# Supplementary material for: Synthesis of new quinolizinium-based fluorescent compounds and studies on their applications in photocatalysis
Source: Royal Society of Chemistry journal article supplement (doi:10.1039/d1ob00716e), 2021-01-01

**Synthesis of new quinolizinium-based fluorescent  
compounds and studies on their applications in  
photocatalysis**

Wai-Ming Yip,<sup>‡ab</sup> Qiong Yu,<sup>‡a</sup> Ajcharapan Tantipanjaporn,<sup>‡b</sup> Wing-Cheung Chan,<sup>b</sup>  
Jie-Ren Deng,<sup>ab</sup> Ben Chi-bun Ko\*<sup>b</sup> and Man-Kin Wong\*<sup>ab</sup>

<sup>a</sup> The Hong Kong Polytechnic University, Shenzhen Research Institute, Shenzhen,  
518057, People's Republic of China

<sup>b</sup> State Key Laboratory of Chemical Biology and Drug Discovery, Department of  
Applied Biology and Chemical Technology, The Hong Kong Polytechnic University,  
Hung Hum, Hong Kong

**SUPPORTING INFORMATION**

## General procedure

All of the photochemical experiments were performed in a custom made “light box” with 4 reaction vessels surrounded by 16 Blue LEDs. The temperature was maintained by a fan attached to the “light box”. A voltage transformer was connected with the Blue LEDs and employed to monitor the power of the light source ( $P = U \times I = 14.3 \text{ V} \times 2.3 \text{ A} = 32.9 \text{ W}$ ). 4 reactions were performed in the “light box” every time for measurement of the reaction yields. The emission spectra of the Blue LEDs revealed a maximum emission wavelength of the light source at  $\lambda_{\text{max}} = 468 \text{ nm}$ . The emission spectra of the light source was shown below.

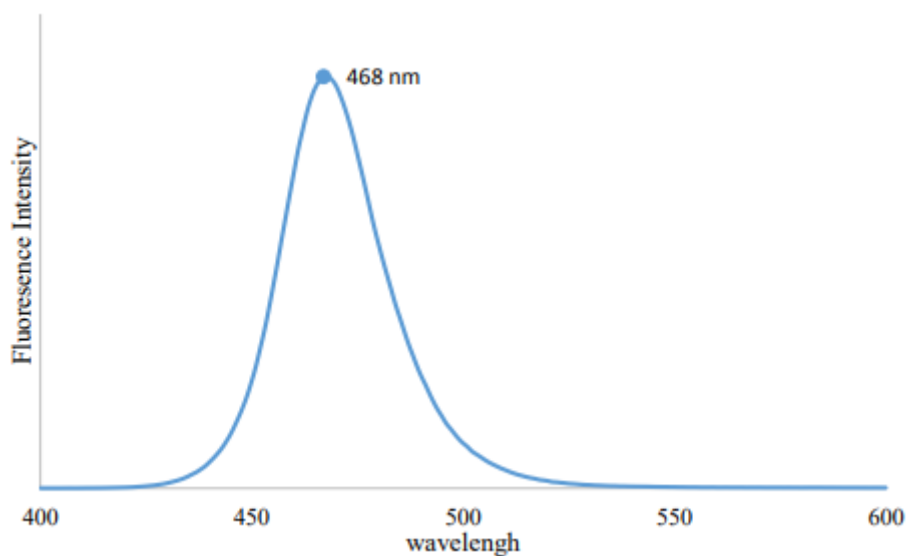

**Figure S1** Emission spectrum of the Blue LEDs light source.

Literature references:

|                                                                                                                                   |                                                                                                                                |
|-----------------------------------------------------------------------------------------------------------------------------------|--------------------------------------------------------------------------------------------------------------------------------|
| 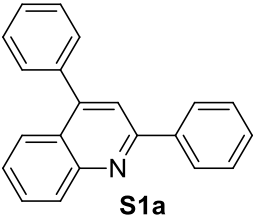 <p style="text-align: center;"><b>S1a</b></p>   | <p>Y.-Y. Liu, Y. Wei, Z. –H. Huang, Y. Liu, <i>Org. Biomol. Chem.</i> 2021, <b>19</b>, 659-666.</p>                            |
|  <p style="text-align: center;"><b>S1b</b></p>   | <p>A. Purkait, S. Saha, S. Ghosh, C. K. Jana, <i>Chem. Commun.</i> 2020, <b>56</b>, 15032-15035.</p>                           |
|  <p style="text-align: center;"><b>S1c</b></p>  | <p>Y. Zhang, L. Chen, Y. Shao, F. Zhang, Z. Chen, N. Lv, J. Chen, R. Li, <i>Org. Chem. Front.</i> 2021, <b>8</b>, 254-259.</p> |
|  <p style="text-align: center;"><b>S1d</b></p> | <p>Y. Zhang, L. Chen, Y. Shao, F. Zhang, Z. Chen, N. Lv, J. Chen, R. Li, <i>Org. Chem. Front.</i> 2021, <b>8</b>, 254-259.</p> |
|  <p style="text-align: center;"><b>S1e</b></p> | <p>Y. Zhang, L. Chen, Y. Shao, F. Zhang, Z. Chen, N. Lv, J. Chen, R. Li, <i>Org. Chem. Front.</i> 2021, <b>8</b>, 254-259.</p> |
|  <p style="text-align: center;"><b>S1f</b></p> | <p>Y. Zhang, L. Chen, Y. Shao, F. Zhang, Z. Chen, N. Lv, J. Chen, R. Li, <i>Org. Chem. Front.</i> 2021, <b>8</b>, 254-259.</p> |

|                                                                                                                                  |                                                                                                                                                                      |
|----------------------------------------------------------------------------------------------------------------------------------|----------------------------------------------------------------------------------------------------------------------------------------------------------------------|
| 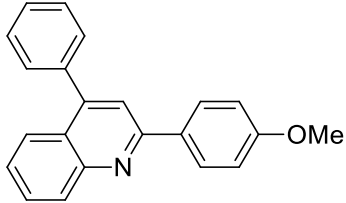 <p style="text-align: center;"><b>S1g</b></p>  | <p>Y. Zhang, L. Chen, Y. Shao, F. Zhang, Z. Chen, N. Lv, J. Chen, R. Li, <i>Org. Chem. Front.</i> 2021, 8, 254-259.</p>                                              |
|  <p style="text-align: center;"><b>S1h</b></p>  | <p>Y. Zhang, L. Chen, Y. Shao, F. Zhang, Z. Chen, N. Lv, J. Chen, R. Li, <i>Org. Chem. Front.</i> 2021, 8, 254-259.</p>                                              |
|  <p style="text-align: center;"><b>S1j</b></p>  | <p>J. Zhang, J. Chen, Zhang, X. X. Lei, <i>J. Org. Chem.</i> 2014, <b>79</b>, 10682-10688.</p>                                                                       |
|  <p style="text-align: center;"><b>1a</b></p> | <p>C.-Z. Luo, P. Gandeepan, J. Jayakumar, K. Parthasarathy, Y.-W. Chang and C.-H. Cheng, <i>Chem. Eur. J.</i>, 2013, <b>19</b>, 14181-14186.</p>                     |
|  <p style="text-align: center;"><b>1b</b></p> | <p>J.-R. Deng, W.-C. Chan, N. Chun-Him Lai, B. Yang, C.-S. Tsang, B. Chi-Bun Ko, S. Lai-Fung Chan and M. -K. Wong, <i>Chem. Sci.</i>, 2017, <b>8</b>, 7537-7544.</p> |
|  <p style="text-align: center;"><b>1c</b></p> | <p>C.-Z. Luo, P. Gandeepan, J. Jayakumar, K. Parthasarathy, Y.-W. Chang and C.-H. Cheng, <i>Chem. Eur. J.</i>, 2013, <b>19</b>, 14181-14186</p>                      |

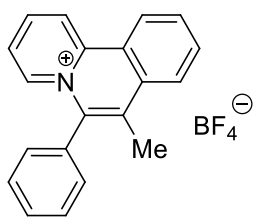

**1t**

C.-Z. Luo, P. Gandeepan, J. Jayakumar, K. Parthasarathy, Y.-W. Chang and C.-H. Cheng, *Chem. Eur. J.*, 2013, **19**, 14181-14186

## General procedure for synthesis of quinolines by three-component coupling

### reaction of aldehydes, amines and alkynes

A mixture of aldehyde (10 mmol, 1equiv.), aniline (12 mmol, 1.2equiv.), aryl alkyne (12 mmol, 1.2 equiv), KAuCl<sub>4</sub> (5 mol%), CuBr (30 mol%) and 20 mL of methanol was heated in 50 mL round bottom flask at 40°C under N<sub>2</sub> overnight. The solvent was removed by evaporation under reduced pressure, and the residue was purified by flash column chromatography using DCM/hexane as eluent to give the quinoline products.

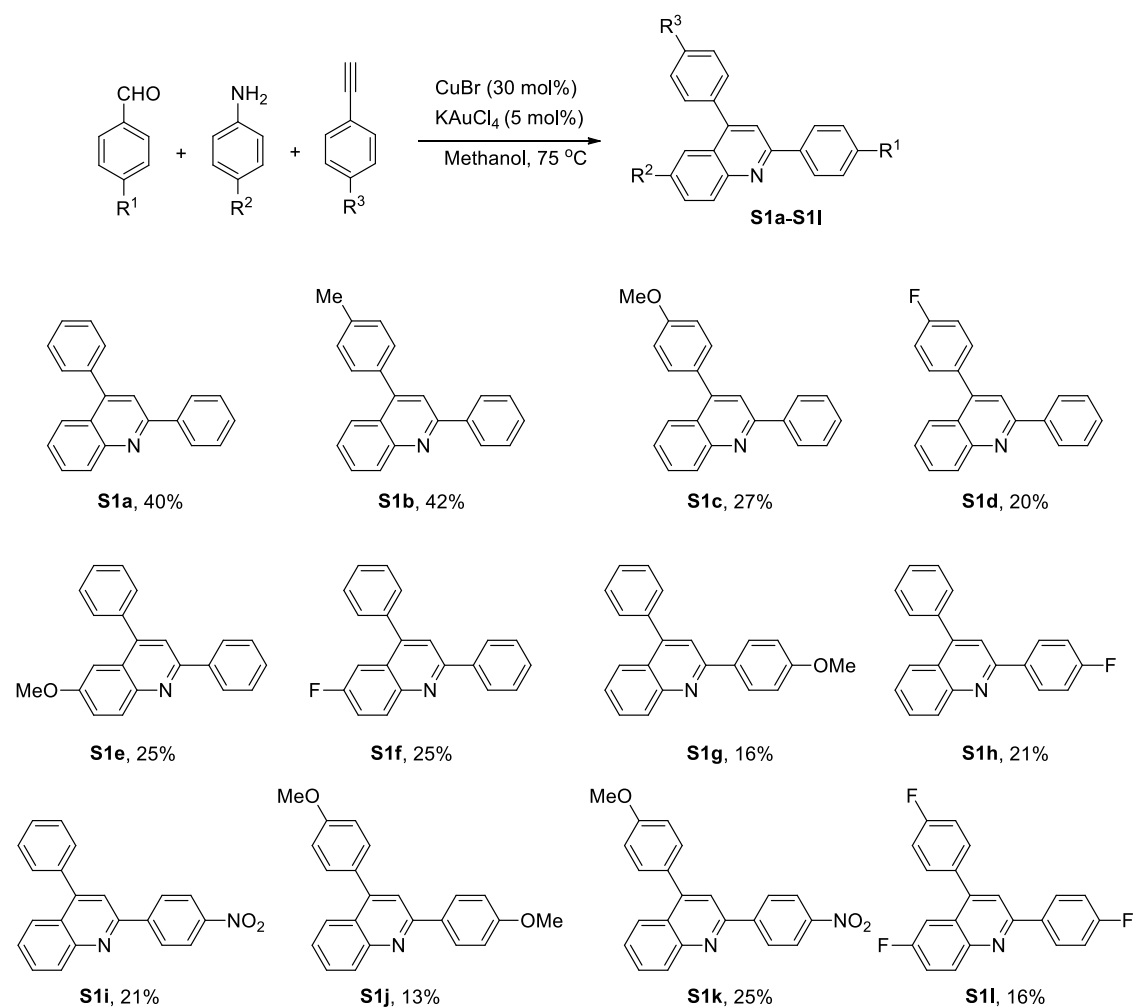

Scheme S1 Synthetic routes of Quinoline substrates S1a-S1l

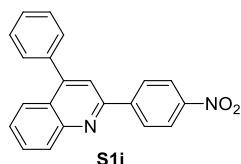

**$^1\text{H NMR}$**  (400 MHz,  $\text{CDCl}_3$ )  $\delta$  8.30 (q,  $J = 9.0$  Hz, 4H), 8.24 (d,  $J = 8.4$  Hz, 1H), 7.93 (d,  $J = 8.3$  Hz, 1H), 7.81 (s, 1H), 7.76 (t,  $J = 7.2$  Hz, 1H), 7.59 – 7.47 (m, 6H).

**$^{13}\text{C NMR}$**  (100 MHz,  $\text{CDCl}_3$ )  $\delta$  153.76, 149.67, 148.62, 148.10, 145.14, 137.74, 130.21, 129.92, 129.39, 128.61, 128.15, 127.99, 127.19, 125.99, 125.62, 123.72, 118.87.

**HRMS** (ESI) calcd for  $\text{C}_{21}\text{H}_{15}\text{N}_2\text{O}_2^+$  ( $\text{M} + \text{H}$ ) $^+$  327.1128, found 327.1165.

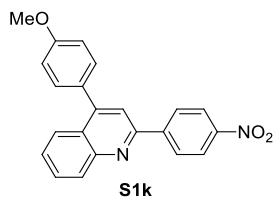

**$^1\text{H NMR}$**  (400 MHz,  $\text{CDCl}_3$ )  $\delta$  8.46 – 8.36 (m, 4H), 8.27 (d,  $J = 8.4$  Hz, 1H), 8.02 (d,  $J = 8.3$  Hz, 1H), 7.86 (s, 1H), 7.80 (t,  $J = 7.6$  Hz, 1H), 7.56 (dd,  $J = 15.1, 8.2$  Hz, 3H), 7.13 (d,  $J = 8.6$  Hz, 2H), 3.95 (s, 3H).

**$^{13}\text{C NMR}$**  (100 MHz,  $\text{CDCl}_3$ )  $\delta$  160.11, 154.13, 149.63, 148.91, 148.34, 145.61, 130.83, 130.35, 130.20, 130.00, 128.35, 127.21, 125.86, 124.04, 119.07, 114.23, 55.48.

**HRMS** (ESI) calcd for  $\text{C}_{22}\text{H}_{17}\text{N}_2\text{O}_3^+$  ( $\text{M} + \text{H}$ ) $^+$  357.1234, found 327.1277.

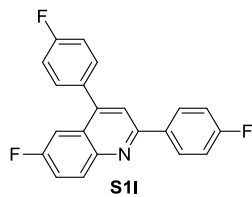

**$^1\text{H NMR}$**  (400 MHz,  $\text{CDCl}_3$ )  $\delta$  8.29 – 8.12 (m, 3H), 7.78 (s, 1H), 7.60 – 7.39 (m, 4H), 7.33 – 7.21 (m, 4H).

**$^{13}\text{C NMR}$**  (100 MHz,  $\text{CDCl}_3$ )  $\delta$  165.13, 164.30, 162.65, 161.91, 161.83, 159.45, 155.15, 147.80, 147.74, 145.89, 135.34, 133.81, 132.62, 132.53, 131.13, 131.05, 129.35, 129.26, 126.44, 126.34, 120.05, 119.79, 119.53, 116.05, 115.97, 115.83, 115.75, 108.97, 108.74.

**$^{19}\text{F NMR}$**  (377 MHz,  $\text{CDCl}_3$ )  $\delta$  -112.03, -112.51, -112.64.

**HRMS** (ESI) calcd for  $\text{C}_{21}\text{H}_{13}\text{F}_3\text{N}^+$  ( $\text{M} + \text{H}$ ) $^+$  336.0995, found 336.1007.



## General Procedure for Photooxidative of Aromatic Alkene with Quinolinium

### Photocatalysts

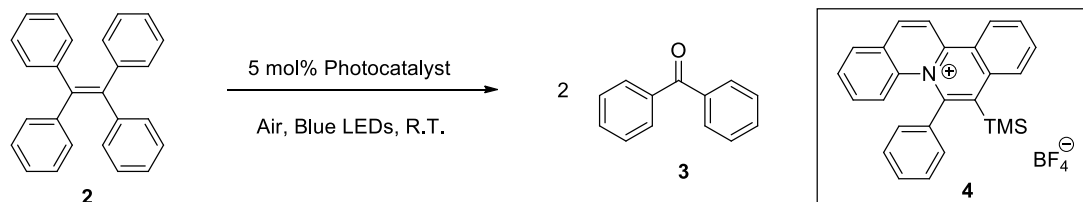

A mixture of tetraphenylethylene **2** (0.2mmol), photocatalysts (5 mol%) in 5 mL of DCE or 5 mL of chloroform was added to a 20 mL test tube. The test tube was irradiated with Blue LEDs for 4 h. After 4 h, the reaction mixture was concentrated under reduced pressure. To determinate the NMR yield, internal standard 1,3,5-trimethoxybenzene (0.2 mmol, 1equiv.) and 2 mL of CDCl<sub>3</sub> were mixed with the residue for <sup>1</sup>H NMR analysis. For product isolation, the resulting residue was purified by flash chromatography on silica gel using EtOAc/hexane as eluent to give the desired product.

**Table S1** Chemical shifts of compounds in CDCl<sub>3</sub>

| Compound                               | Chemical shift of H in <sup>1</sup> H NMR |
|----------------------------------------|-------------------------------------------|
| <br><chem>COc1cc(OC)c(OC)c1</chem>     | 6.12                                      |
| <br><chem>O=C(c1ccccc1)c2ccccc2</chem> | 7.84-7.82                                 |

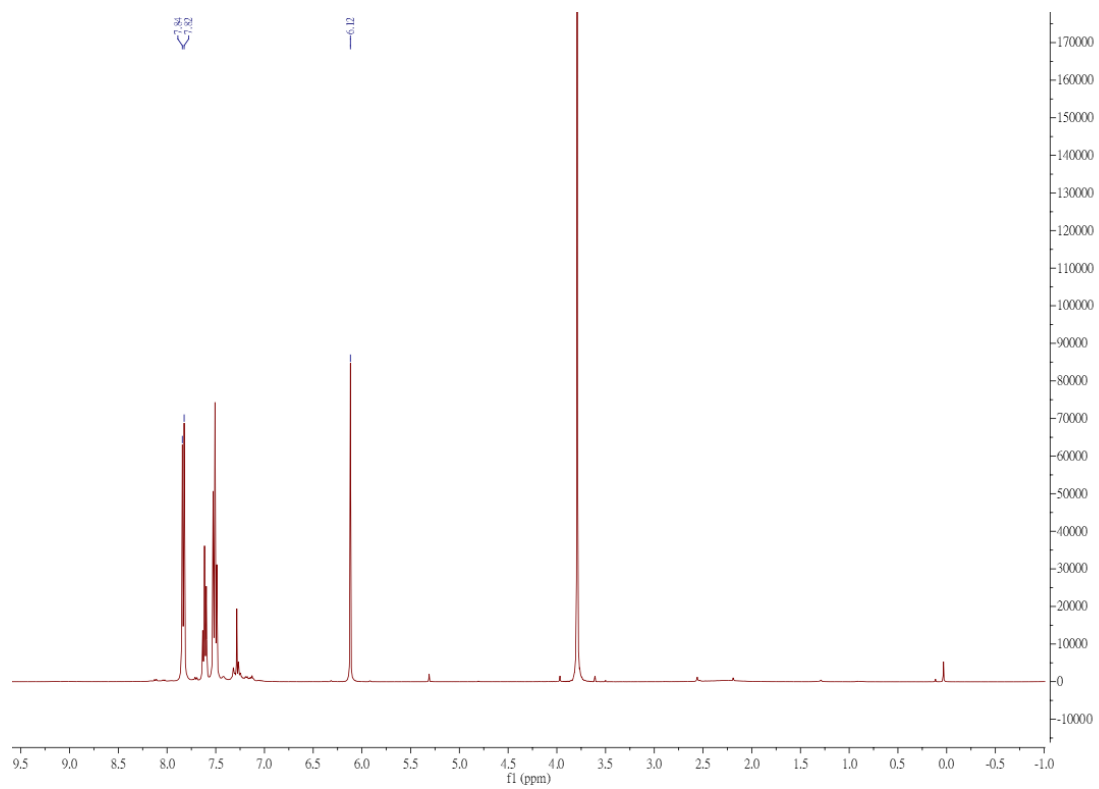

**Figure S2** Determination of the NMR yield of **3** when quinolizinium compounds were employed as photocatalyst and 1,3,5-trimethoxybenzene was used as internal standard.

**Table S2 Photooxidative cleavage of tetraphenylethylene **2** using photocatalyst **4** <sup>a</sup>**

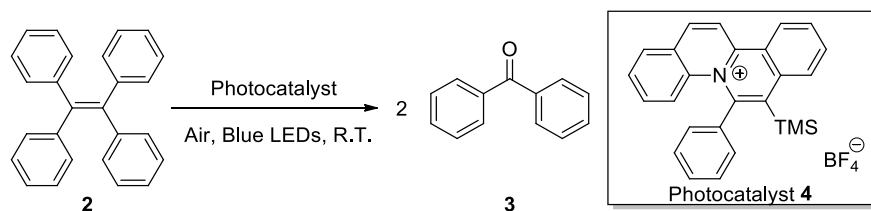

| Entry           | <b>4</b> (mol%) | Solvent                             | Yield(%) <sup>b</sup> |
|-----------------|-----------------|-------------------------------------|-----------------------|
| 1               | 5               | Hexane                              | n.d.                  |
| 2               | 5               | Toluene                             | 50                    |
| 3               | 5               | 1,4 Dioxane                         | 34                    |
| 4               | 5               | THF                                 | 6                     |
| 5               | 5               | CCl <sub>4</sub>                    | n.d.                  |
| 6               | 5               | Chloroform                          | 60                    |
| 7               | 5               | DCM                                 | 37                    |
| 8               | 5               | DCE                                 | 62                    |
| 9               | 5               | Acetone                             | 29                    |
| 10              | 5               | DMF                                 | n.d.                  |
| 11              | 5               | DMSO                                | n.d.                  |
| 12              | 5               | CH <sub>3</sub> CN                  | 40                    |
| 13              | 5               | Ethanol                             | 47                    |
| 14              | 5               | Methanol                            | 51                    |
| 15              | 5               | H <sub>2</sub> O                    | n.d.                  |
| 16              | 5               | CH <sub>3</sub> CN/H <sub>2</sub> O | n.d.                  |
| 17              | 10              | DCE                                 | 60                    |
| 18              | 2.5             | DCE                                 | 57                    |
| 19              | 1               | DCE                                 | 53                    |
| 20              | 0               | DCE                                 | n.d.                  |
| 21 <sup>c</sup> | 5               | DCE                                 | n.d.                  |
| 22 <sup>d</sup> | 5               | DCE                                 | n.d.                  |
| 23 <sup>e</sup> | 5               | DCE                                 | 82                    |

<sup>a</sup> Reaction conditions: treatment of tetraphenylethylene **2** (0.2 mmol), photocatalyst **4** (5 mol%) in 5 mL of solvent under air and blue LEDs light for 4 h at room temperature. <sup>b</sup> Yield was determined by <sup>1</sup>H NMR using 1,3,5-trimethoxybenzene as internal standard. <sup>c</sup> The reaction was conducted without light. <sup>d</sup> The reaction was conducted under N<sub>2</sub>. <sup>e</sup> The reaction was conducted under 1 atm O<sub>2</sub>.

## General Procedure for photocatalysts for C-H bond functionalization

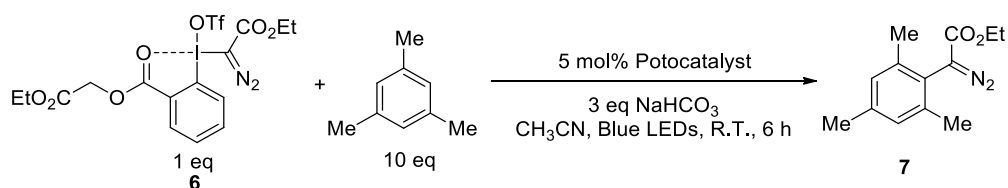

To a 10 mL oven-dried tube equipped with a stirring bar was added photocatalyst (0.01 mmol, 5 mol%), NaHCO<sub>3</sub> (50.4 mg, 0.6 mmol, 3.0 equiv), the 1,3,5-trimethoxybenzene (2 mmol, 10.0 equiv), hypervalent iodine reagent **6** (0.2 mmol, 1.0 equiv) and MeCN (2.0 mL). The tube was sealed with a septum and degassed by three freeze-pump-thaw cycles under nitrogen. Then the reaction tube was placed in a photoreactor equipped with Blue LEDs. A mini-fan was kept on top to maintain room temperature. After the reaction completed after 6 hours, the reaction mixture was passed through a short pad of silica gel and washed with dichloromethane. The solvent was removed under vacuum and the residue was purified by column chromatography on silica gel to give the corresponding diazo compound **7**.

**Table S3** Evaluation of photocatalysts for oxygenation of tertiary amine to amide<sup>a</sup>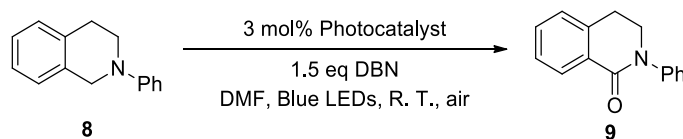

| Entry | Catalyst               | Time (h) | Recovery of <b>8</b> (%) <sup>b</sup> | Yield of <b>9</b> (%) <sup>b</sup> |
|-------|------------------------|----------|---------------------------------------|------------------------------------|
| 1     | <b>1n</b>              | 17       | 76                                    | 24                                 |
| 2     | <b>1n</b>              | 48       | 39                                    | 56                                 |
| 3     | <b>4b</b>              | 17       | 23                                    | 67                                 |
| 4     | <b>4b</b> <sup>c</sup> | 24       | 16                                    | 76                                 |
| 5     | <b>4b</b>              | 48       | 0                                     | 87 <sup>d</sup>                    |
| 6     | <b>4</b>               | 30       | 0                                     | 88 <sup>d</sup>                    |

<sup>a</sup> Reaction conditions: treatment of amine **8** (0.15 mmol), photocatalyst (3 mol%) in 0.5 mL of DMF and blue LEDs light at room temperature. <sup>b</sup> Yield was determined by <sup>1</sup>H NMR using CH<sub>2</sub>Br<sub>2</sub> as internal standard. <sup>c</sup> 5 mol% photocatalyst was used. <sup>d</sup> Isolated yield.

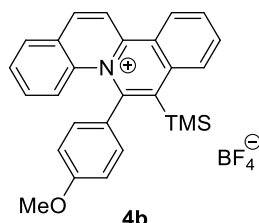

### Experimental procedure for light-induced oxygenation of tertiary amine to amide

To a mixture of amine **8** (31 mg, 0.15 mmol, 1.0 equiv.) and photocatalyst (0.0045 mmol, 3mol%) in DMF (0.5 mL) was added DBN (28 mg, 0.225 mmol, 1.5 equiv.) in a 10 mL test tube. The solution was stirred at room temperature under Blue LEDs irradiation in open to air (without bubbling air). The mixture was concentrated in vacuo to yield the crude product, which was purified by flash chromatography on silica gel (eluent: Petroleum/EtOAc = 10/1 ~ 5/1) to yield the desired amide **9** as a white solid.

### Photophysical measurements of quinolizinium compounds

The absorption and emission spectra were measured by Cary 8454 UV-Vis Diode Array System and Cary Eclipse Fluorescence Spectrophotometer, respectively, and a final concentration of each quinolizinium compound in CH<sub>2</sub>Cl<sub>2</sub> was diluted to 1 × 10<sup>-5</sup> M. The excitation slit and emission slit for emission measurement were set at 5 nm with scan rate at 120 nm/min and medium PMT voltage. Fluorescent quantum yield of each compound was determined by a comparative method employing fluorescein (Φ = 0.95 in 0.1 N NaOH solution) as standard and calculated with the following equation.

$$\Phi_{sample} = \Phi_{standard} \times \frac{F_{sample}}{F_{standard}} \times \left( \frac{n_{sample}}{n_{standard}} \right)^2 \times \frac{Abs_{sample}}{Abs_{standard}}$$

**Table S4** Photophysical properties of published quinolizinium dyes

| Quinolizinium            | Solvent | $\lambda_{\text{ex}}$ (nm)<br>( $\epsilon$ ; $\text{M}^{-1}\text{cm}^{-1}$ ) | $\lambda_{\text{em}}$<br>(nm) | $\Phi_{\text{F}}$ | $\tau_{\text{F}}$<br>(ns) | Application (Reference)                                                                                                                                                                        |
|--------------------------|---------|------------------------------------------------------------------------------|-------------------------------|-------------------|---------------------------|------------------------------------------------------------------------------------------------------------------------------------------------------------------------------------------------|
|                          | MeCN    | 350 (-)                                                                      | 457                           | 0.17              | 10.5                      | DNA Detection<br>(A. Barbafina, M. Amelia, L. Latterini, G. G. Aloisi and F. Elisei, <i>J. Phys. Chem.</i> , 2009, <b>113</b> , 14514-14520.)                                                  |
|                          | MeCN    | 400 (-)                                                                      | 420                           | 0.15              | 8.7                       |                                                                                                                                                                                                |
|                          | MeCN    | 390 (-)                                                                      | 425                           | 0.34              | 5.6                       |                                                                                                                                                                                                |
|                          | Water   | 407<br>(7400)                                                                | 420                           | 0.30              | -                         | Bromide or iodide sensor<br>(R. B. Jagt, M. S. Kheibari and M. Nitz, <i>Dyes Pigm.</i> , 2009, <b>81</b> , 161-165.)                                                                           |
|                          | DCM     | 430<br>(16596)                                                               | 559                           | 0.079             | -                         | Magnesium detection<br>(M. Tian, H. Ihmels and S. Ye, <i>Org. Biomol. Chem.</i> , 2012, <b>10</b> , 3010-3018.)                                                                                |
|                          | DCM     | 411<br>(10965)                                                               | 538                           | 0.17              | -                         | Fluorosolvatochromism<br>(M. Pithan, D. Decker, M. S. Sardo, G. Viola and H. Ihmels, <i>Beilstein J. Org. Chem.</i> , 2016, <b>12</b> , 854-862.)                                              |
|                          | Water   | 397<br>(4168)                                                                | 532                           | 0.056             | -                         | Fluorosolvatochromism<br>(P. M. Pithan, K. Schwan and H. Ihmels, <i>Arkivoc</i> , 2020, 1-11.)                                                                                                 |
|                          | Water   | 368<br>(12022)                                                               | 544                           | 0.012             | -                         |                                                                                                                                                                                                |
| <br>Our previous version | DCM     | 423<br>(14500)                                                               | 491                           | 0.44              | -                         | Photocatalyst, Cell imaging<br>(J. -R. Deng, W. -C. Chan, N. C. -H. Lai, B. Yang, C. -S. Tsang, B. C. -B. Ko, S. L. -F. Chan and M. -K. Wong, <i>Chem. Sci.</i> , 2017, <b>8</b> , 7537-7544.) |

### UV/Vis Absorption Spectrum of Quinolizinium Compounds

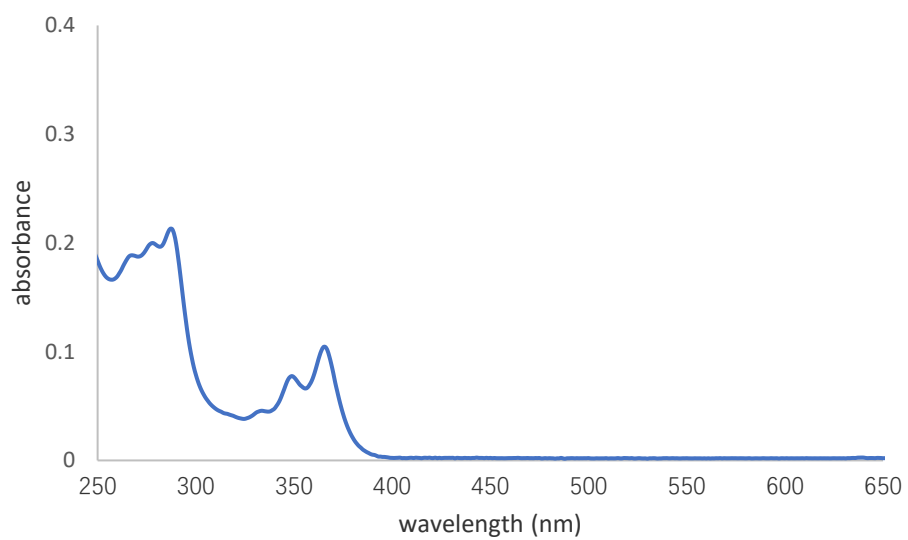

**Figure S3** Absorption spectrum of compound **1a**

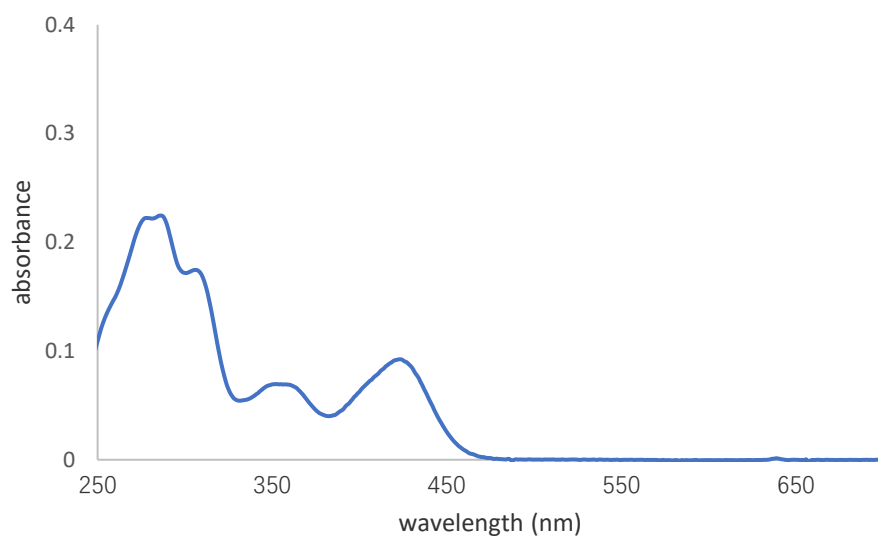

**Figure S4** Absorption spectrum of compound **1b**



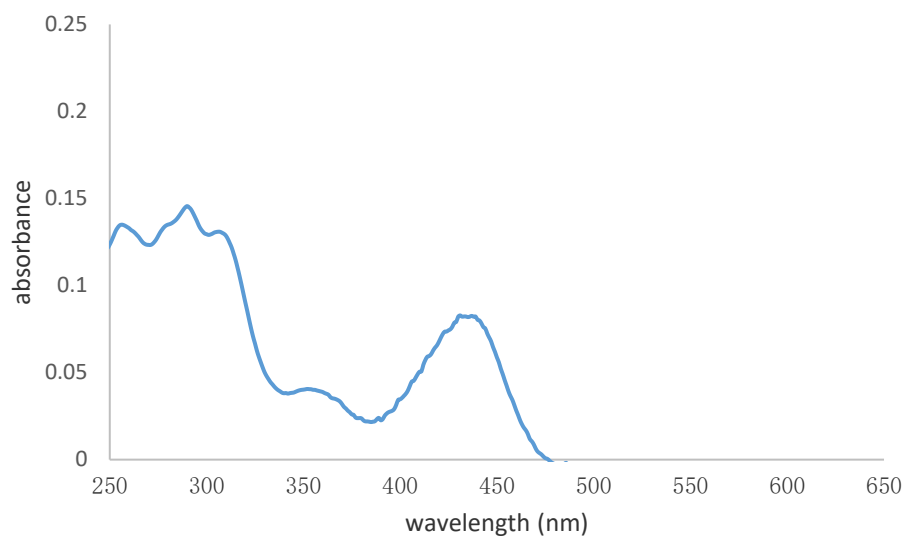

**Figure S5** Absorption spectrum of compound **1c**

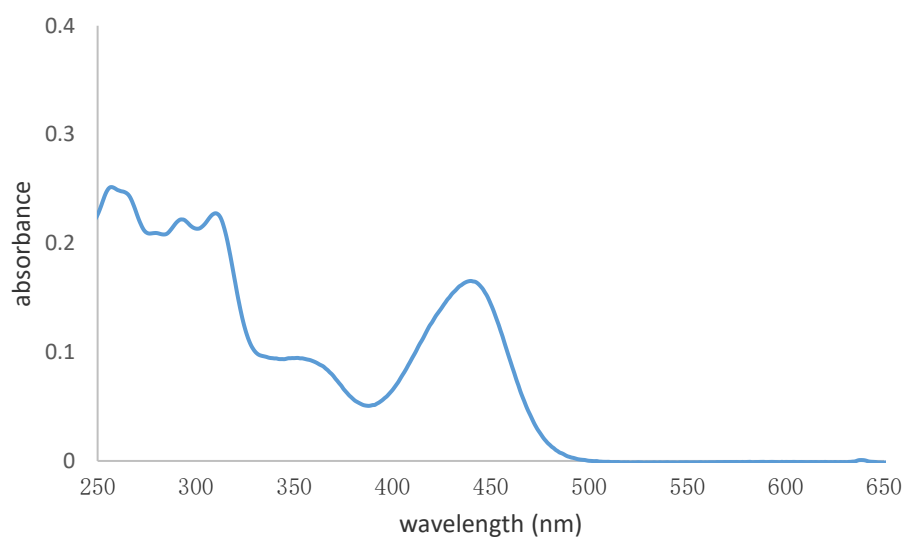

**Figure S6** Absorption spectrum of compound **1d**

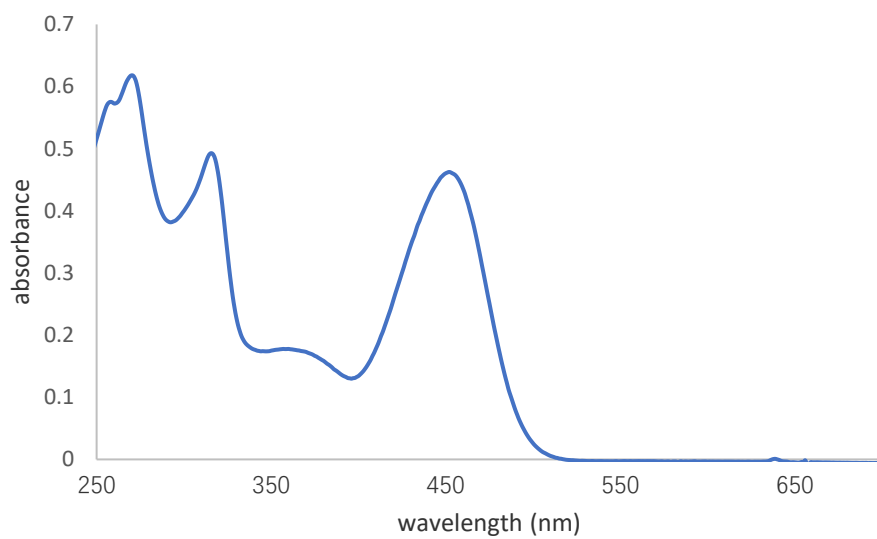

**Figure S7** Absorption spectrum of compound **1e**

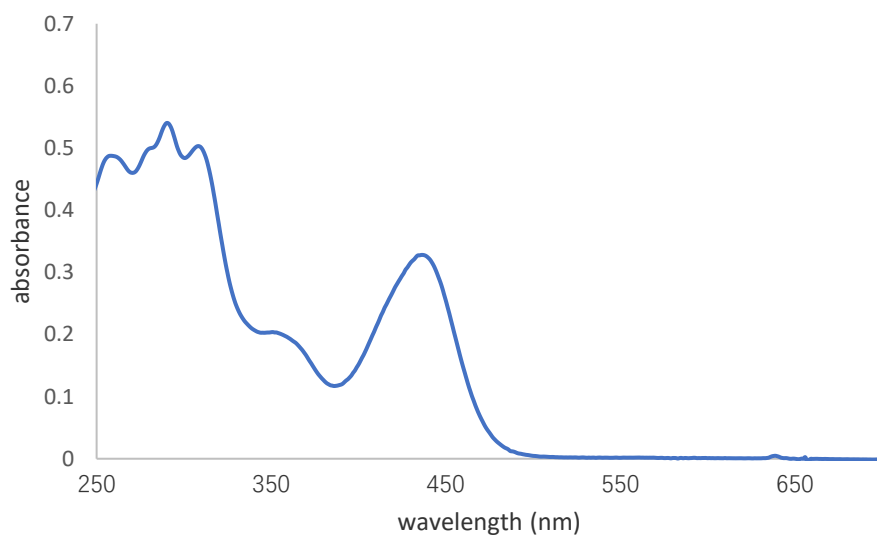

**Figure S8** Absorption spectrum of compound **1f**

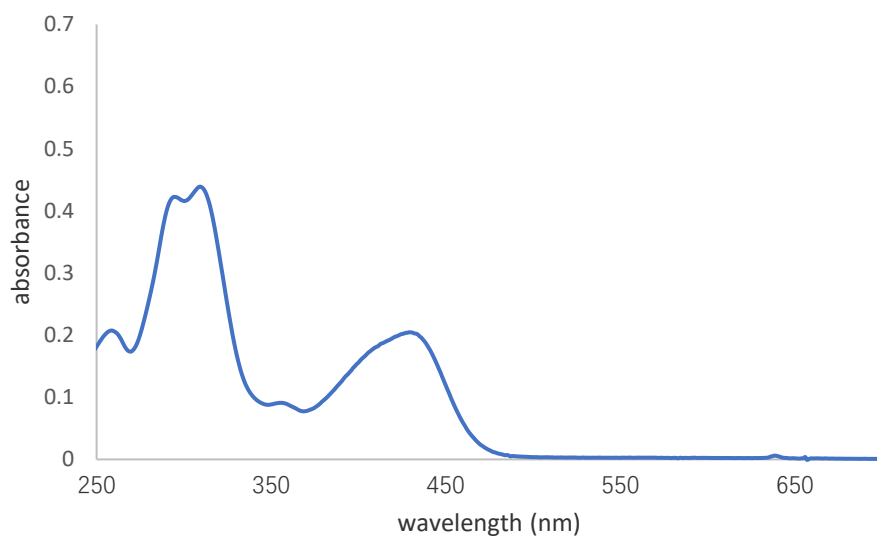

**Figure S9** Absorption spectrum of compound **1g**

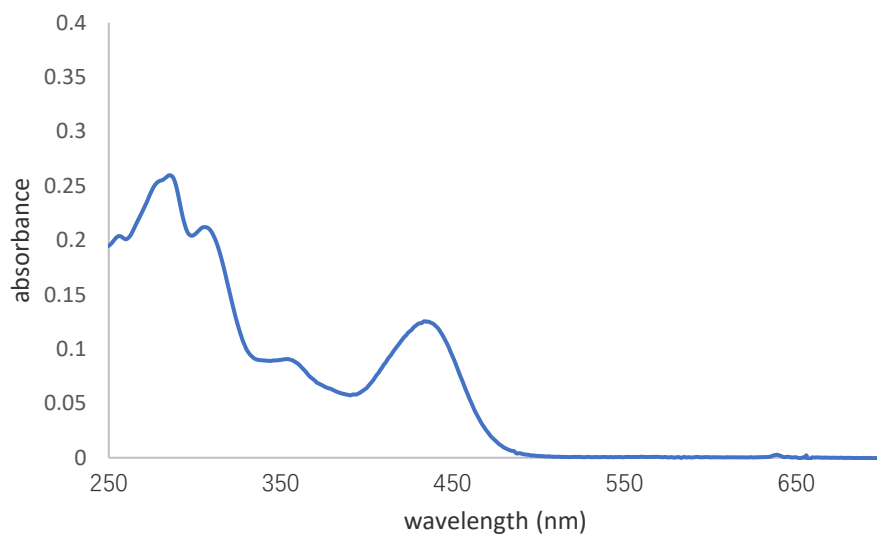

**Figure S10** Absorption spectrum of compound **1h**

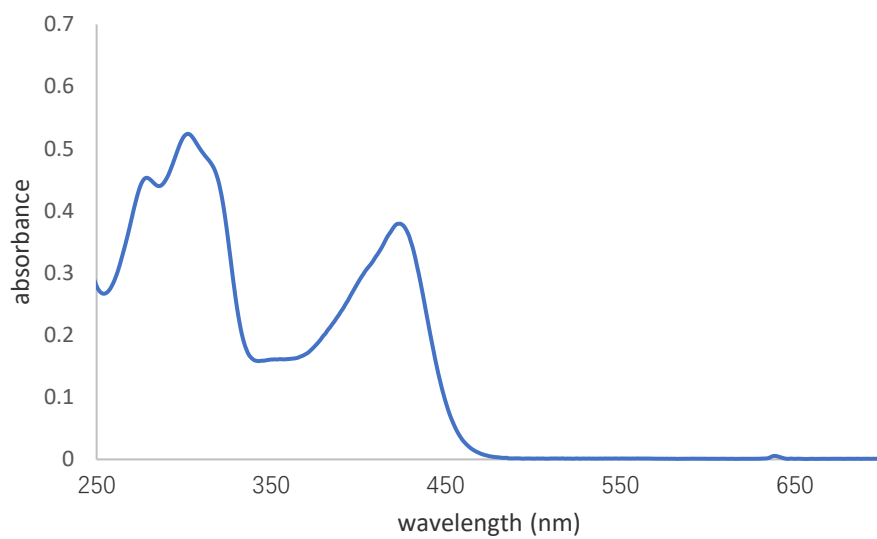

**Figure S11** Absorption spectrum of compound **1i**

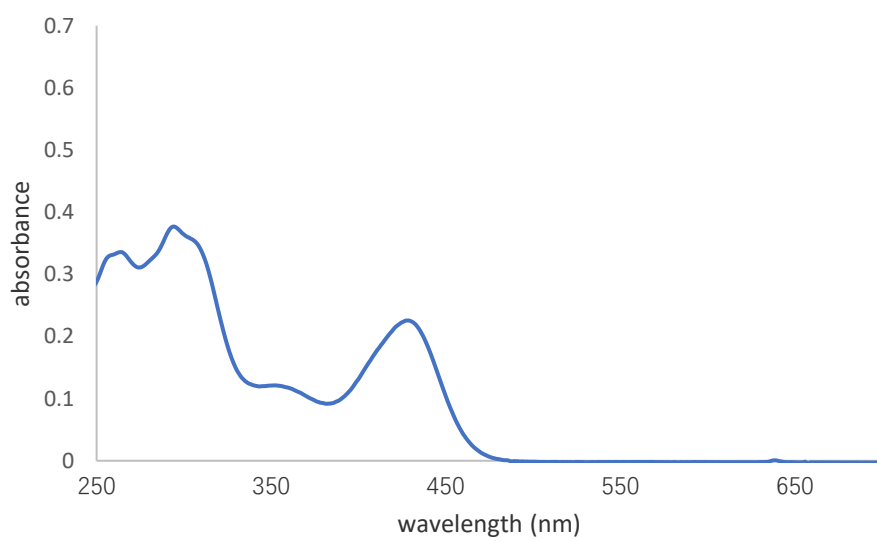

**Figure S12** Absorption spectrum of compound **1j**

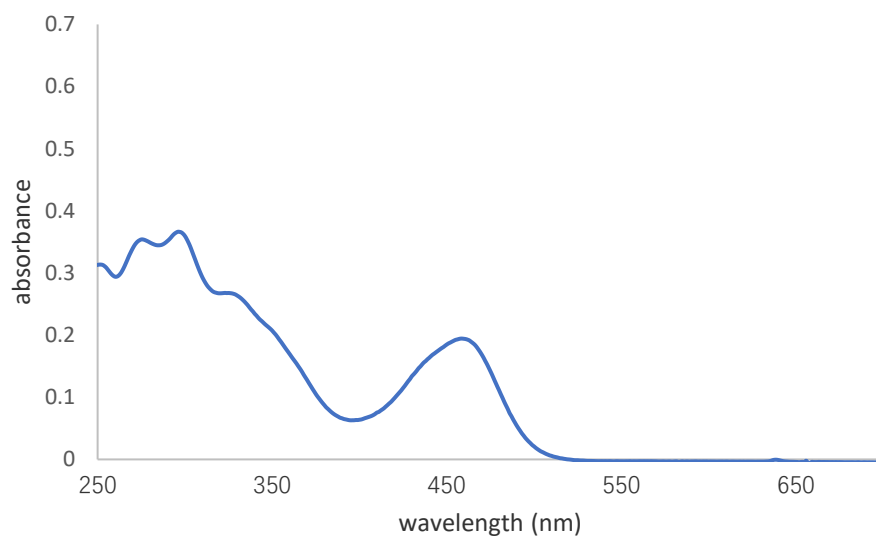

**Figure S13** Absorption spectrum of compound **1k**

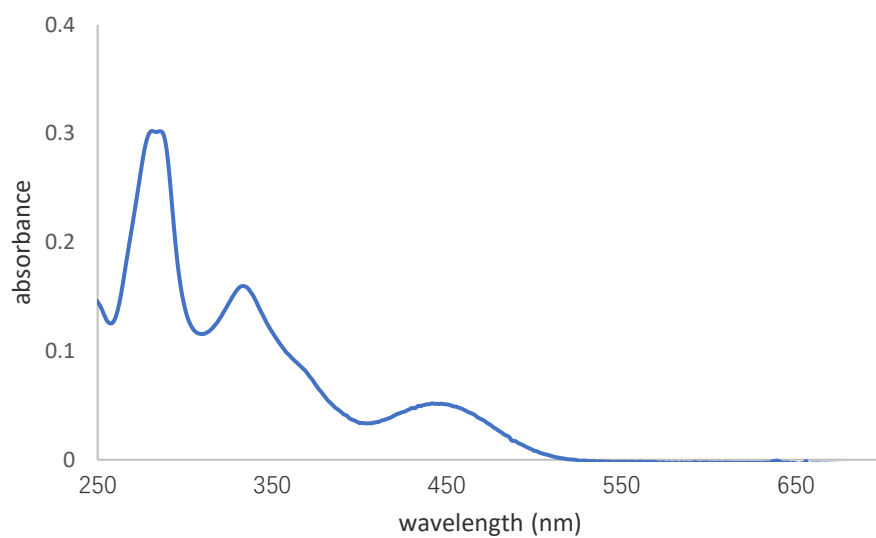

**Figure S14** Absorption spectrum of compound **1l**

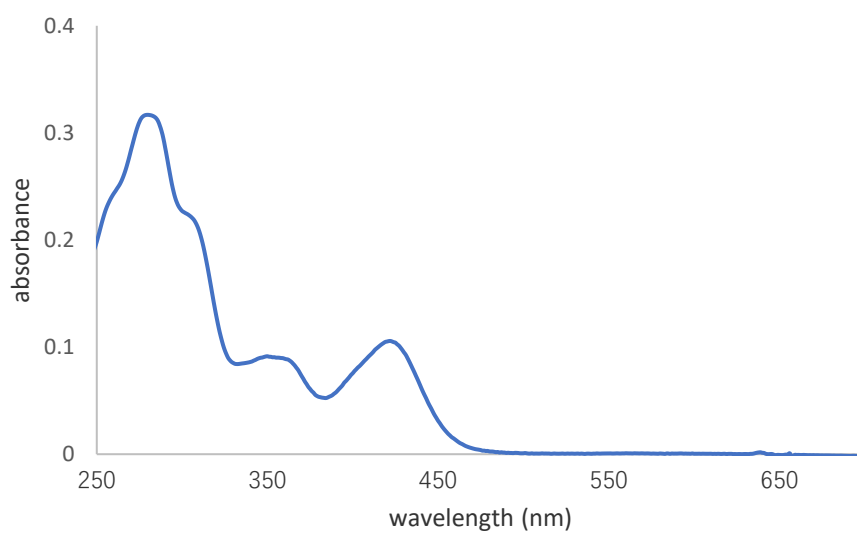

**Figure S15** Absorption spectrum of compound **1m**

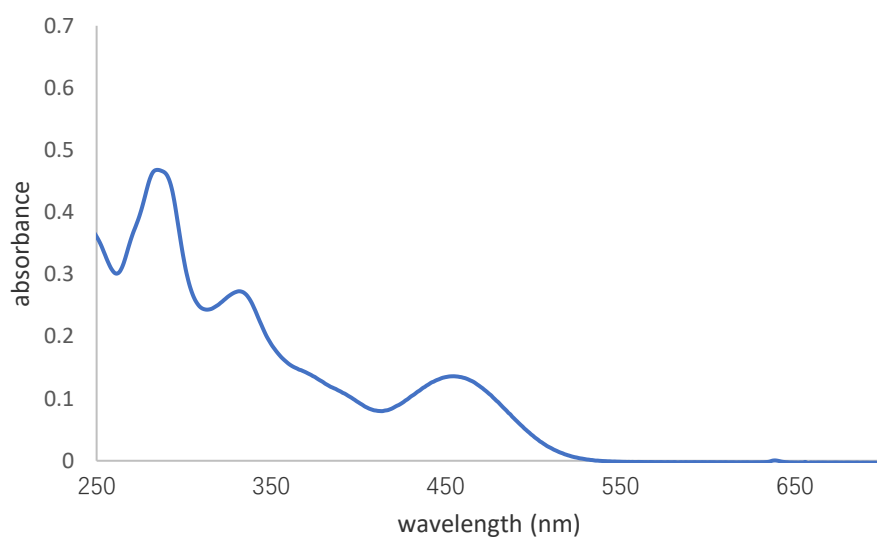

**Figure S16** Absorption spectrum of compound **1n**

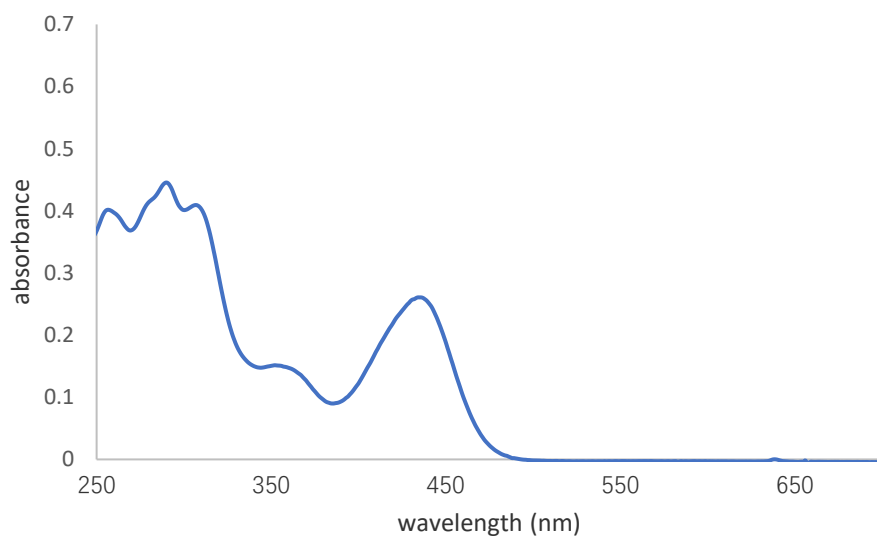

**Figure S17** Absorption spectrum of compound **1o**

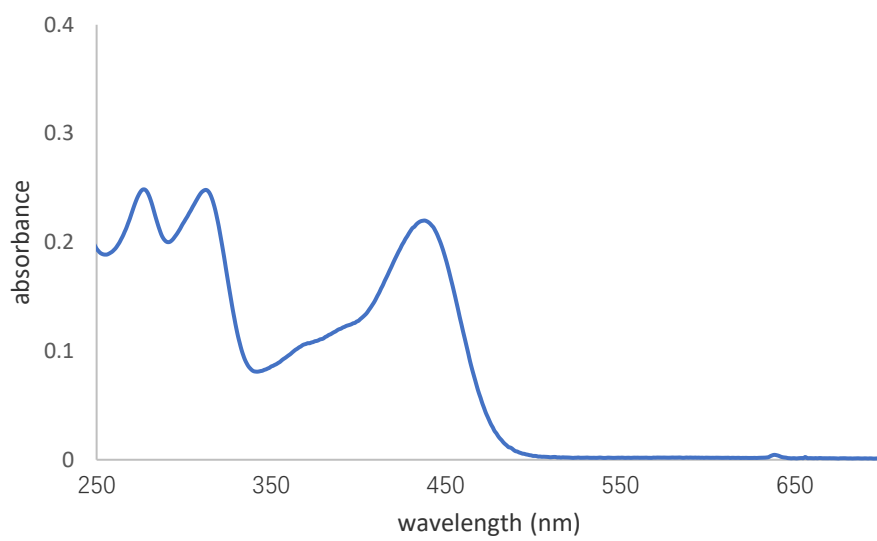

**Figure S18** Absorption spectrum of compound **1p**

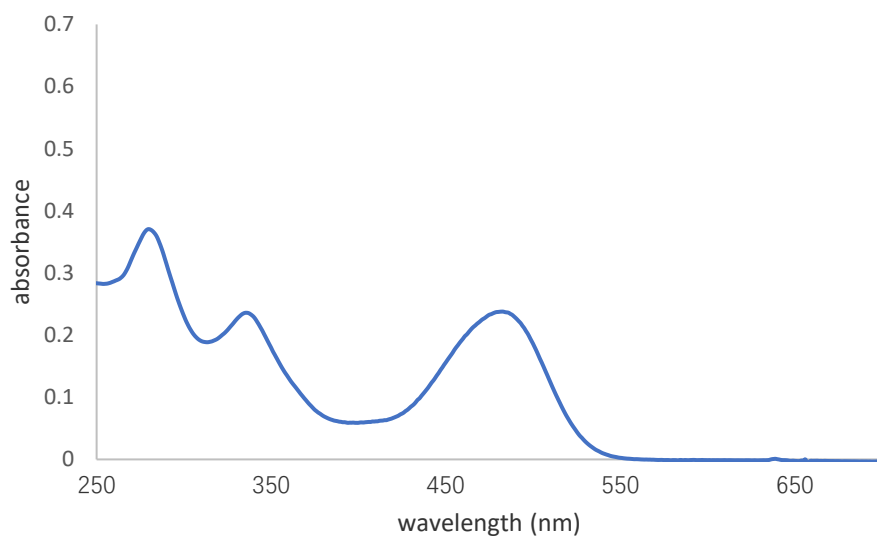

**Figure S19** Absorption spectrum of compound **1q**

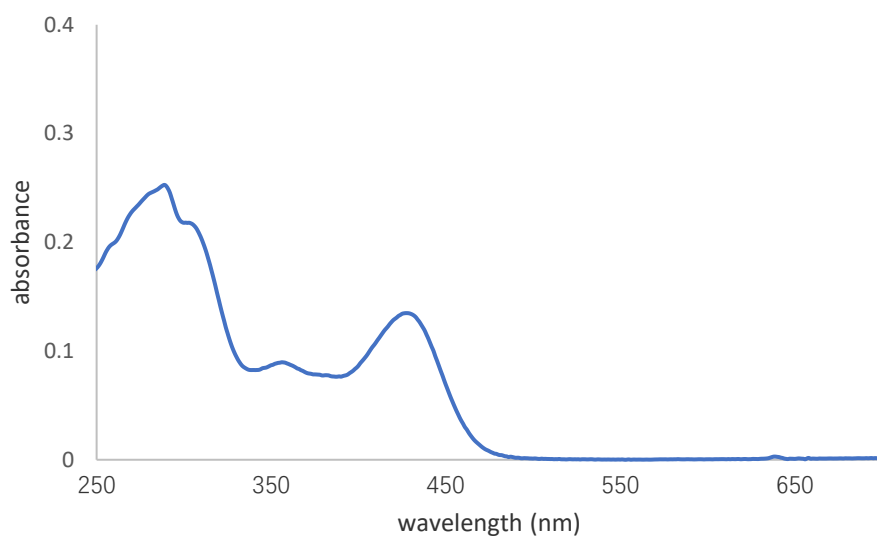

**Figure S20** Absorption spectrum of compound **1r**



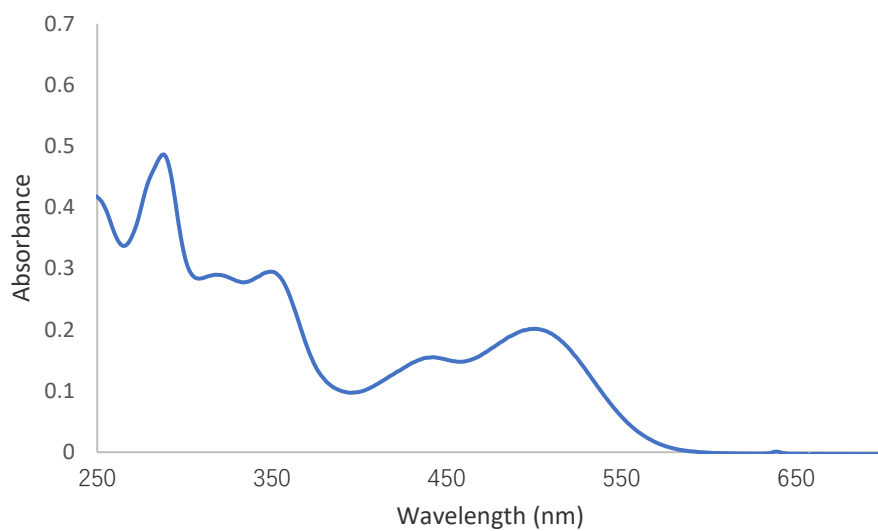

**Figure S21** Absorption spectrum of compound **1s**

## Emission Spectrum of Quinolizinium Compounds

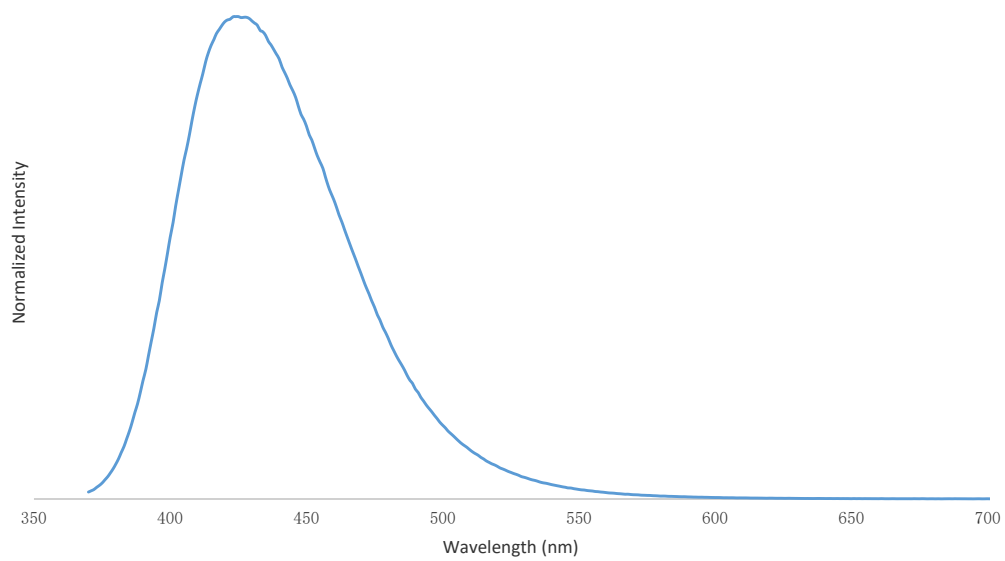

**Figure S22** Emission spectrum of compound **1a**.

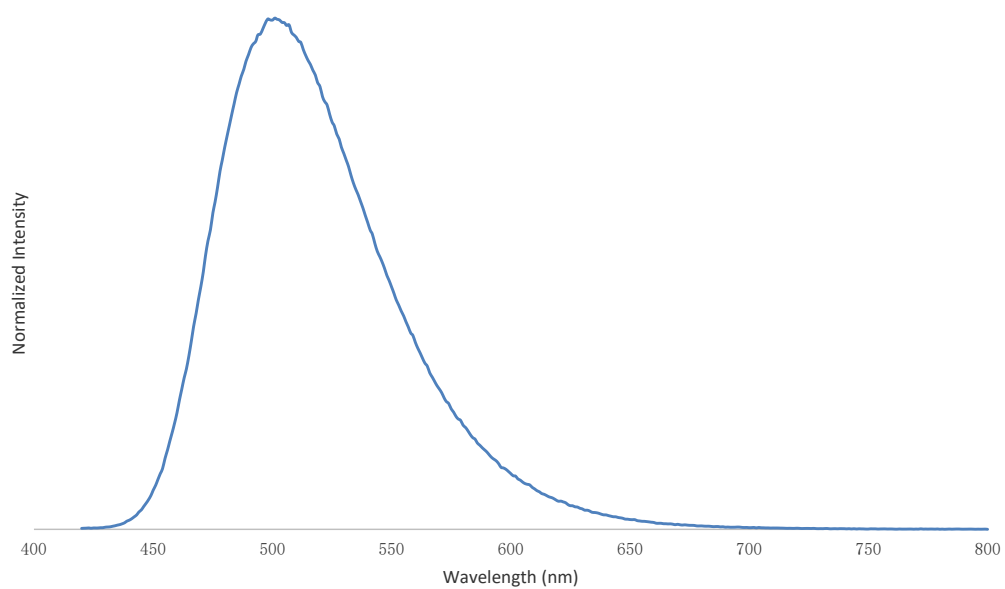

**Figure S23** Emission spectrum of compound **1b**.

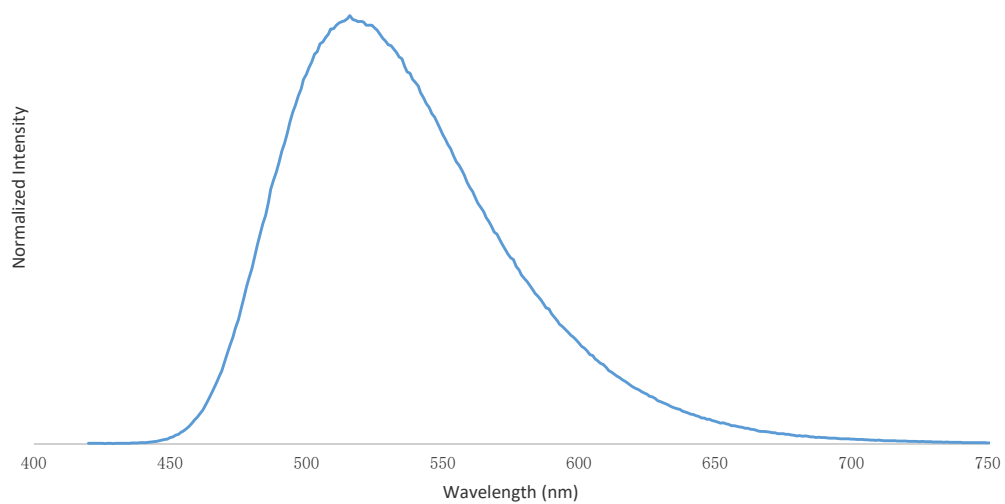

**Figure S24** Emission spectrum of compound **1c**

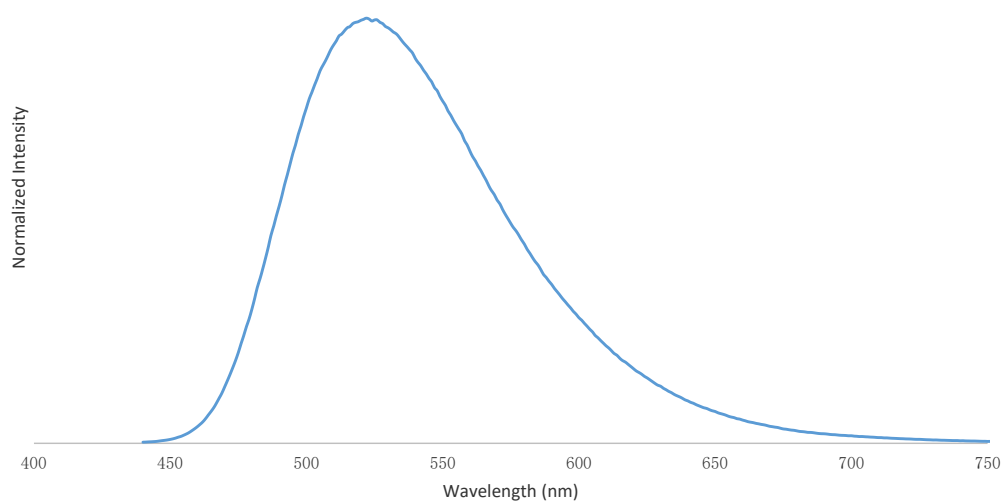

**Figure S25** Emission spectrum of compound **1d**

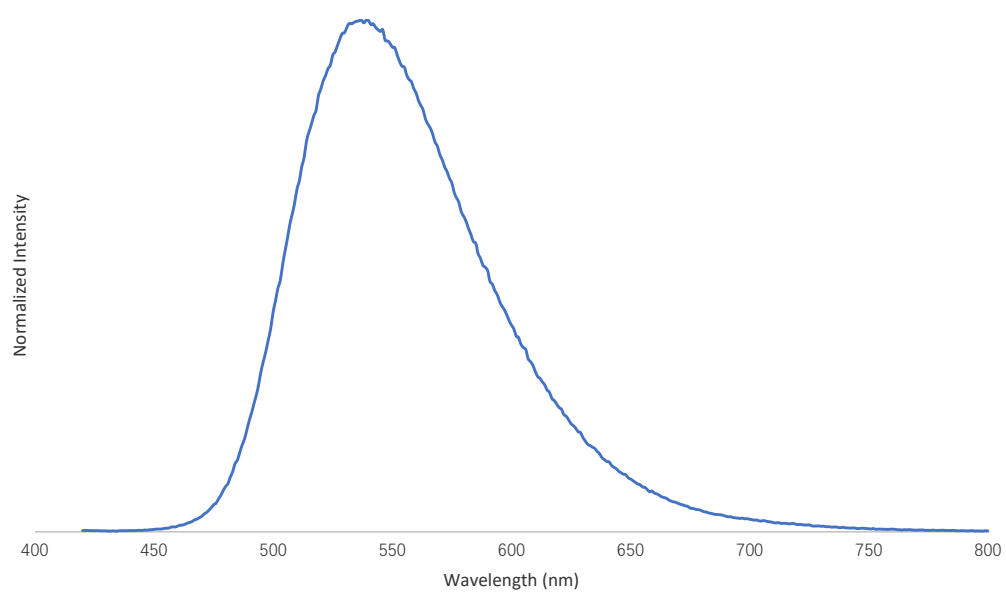

**Figure S26** Emission spectrum of compound **1e**

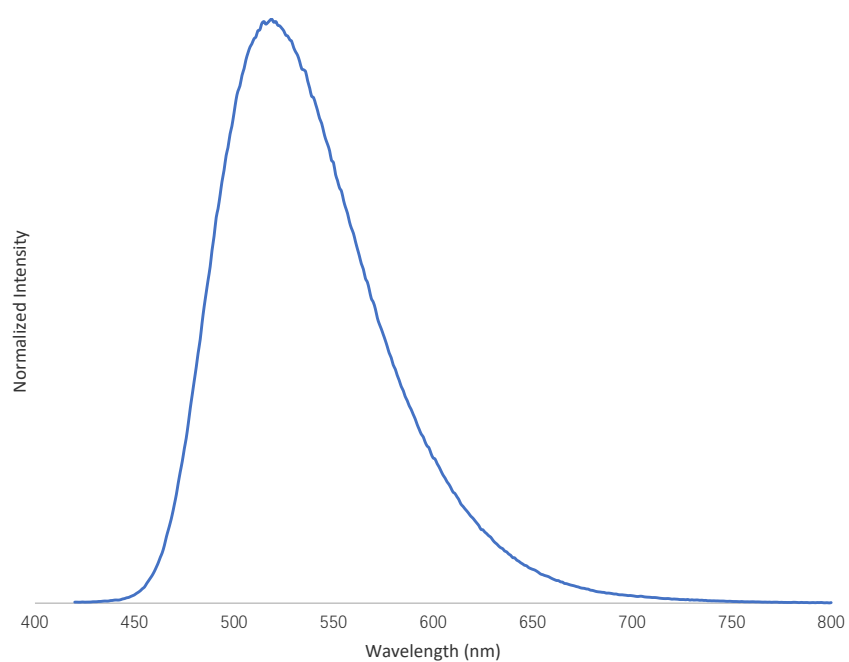

**Figure S27** Emission spectrum of compound **1f**

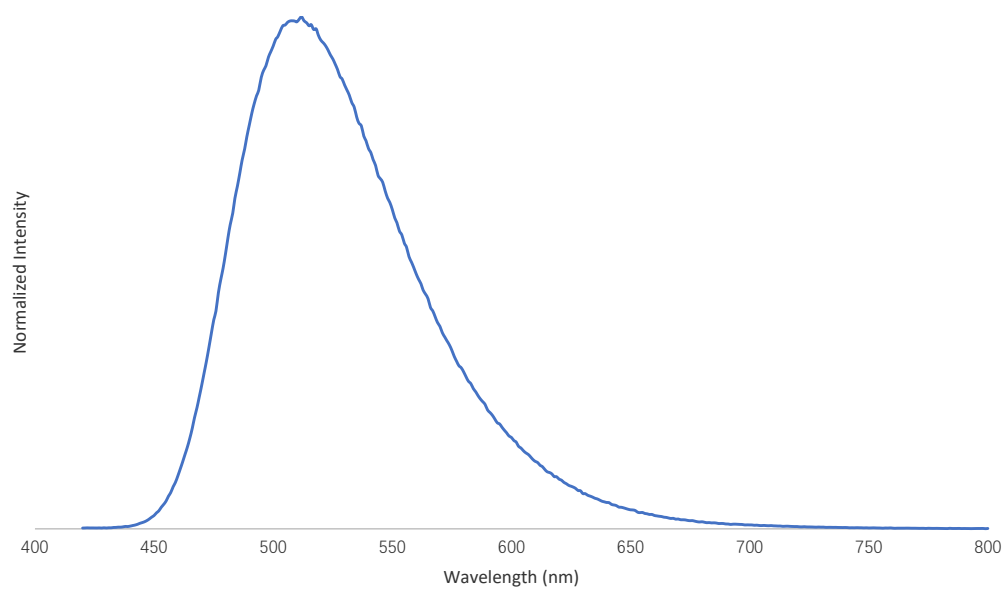

**Figure S28** Emission spectrum of compound **1g**

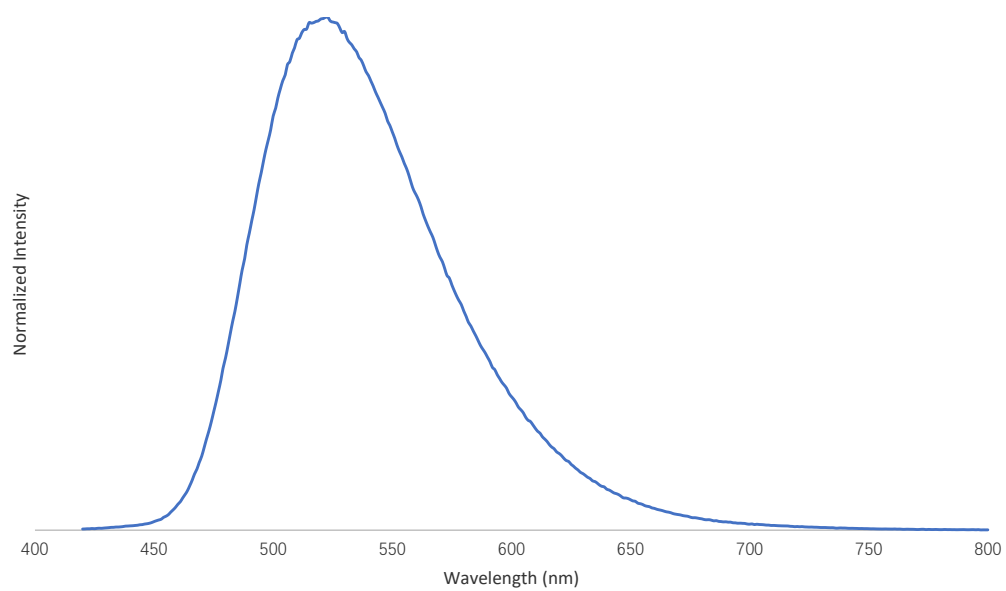

**Figure S29** Emission spectrum of compound **1h**

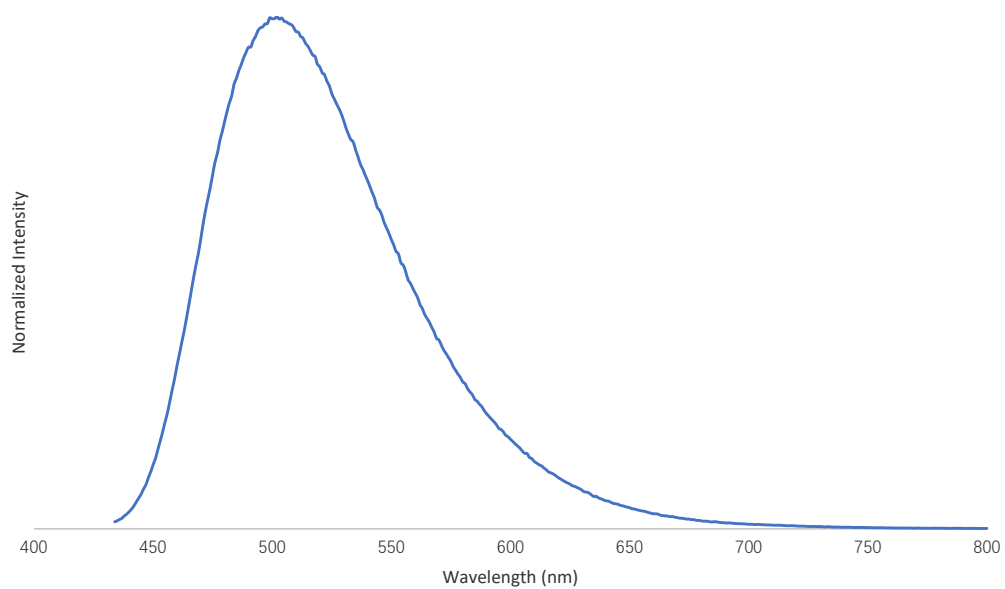

**Figure S30** Emission spectrum of compound **1i**

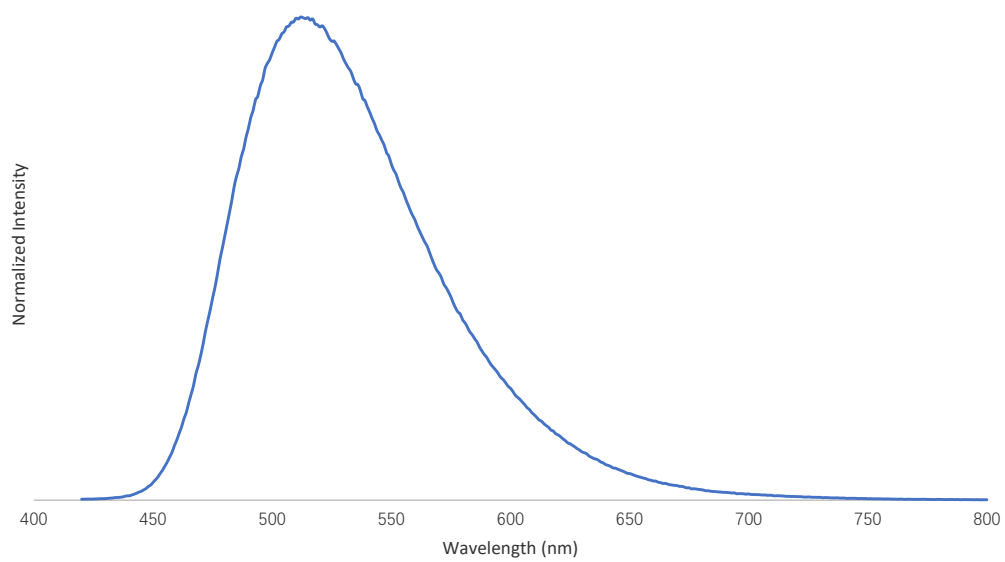

**Figure S31** Emission spectrum of compound **1j**

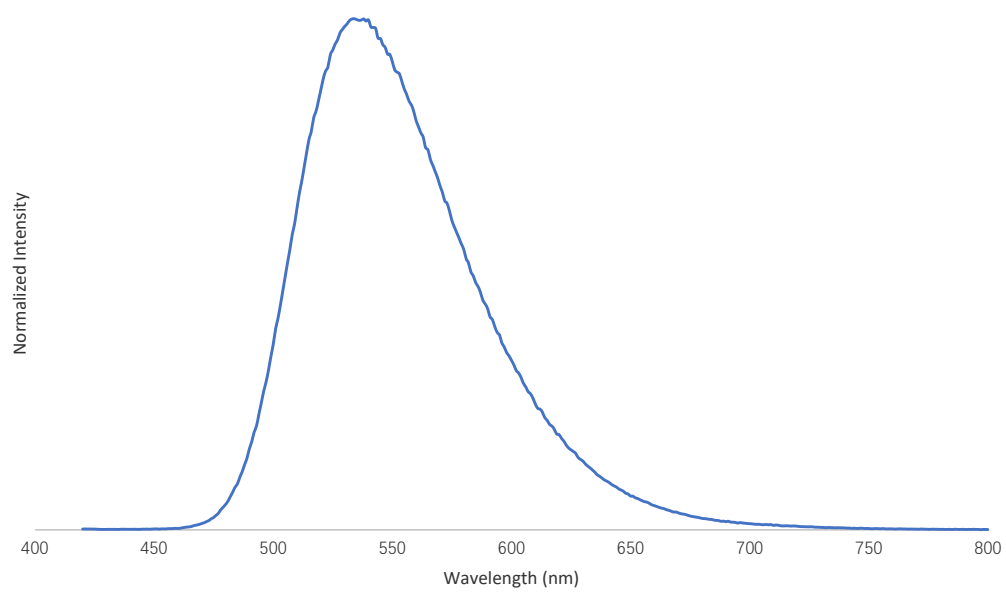

**Figure S32** Emission spectrum of compound **1k**

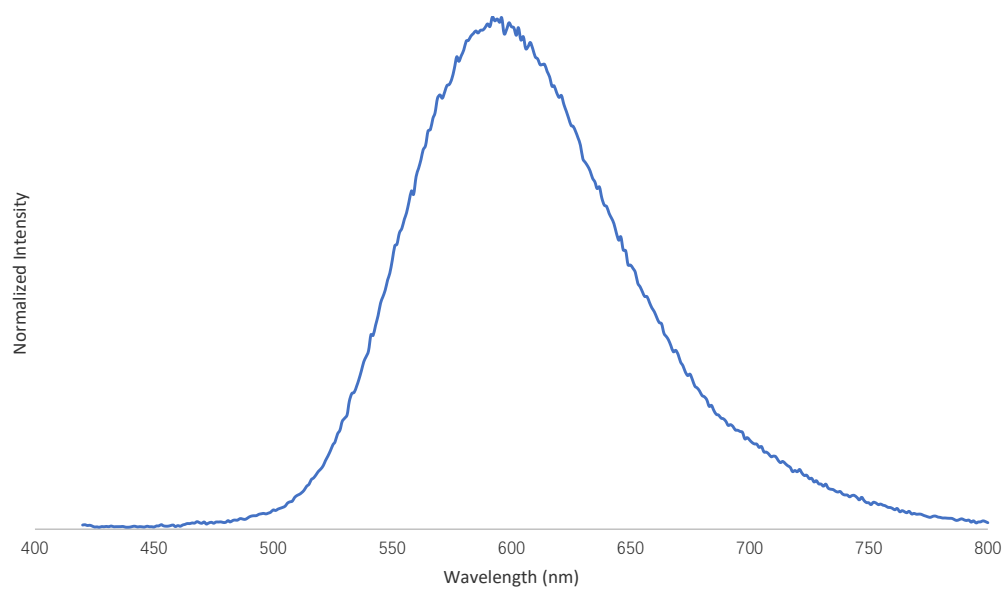

**Figure S33** Emission spectrum of compound **1l**

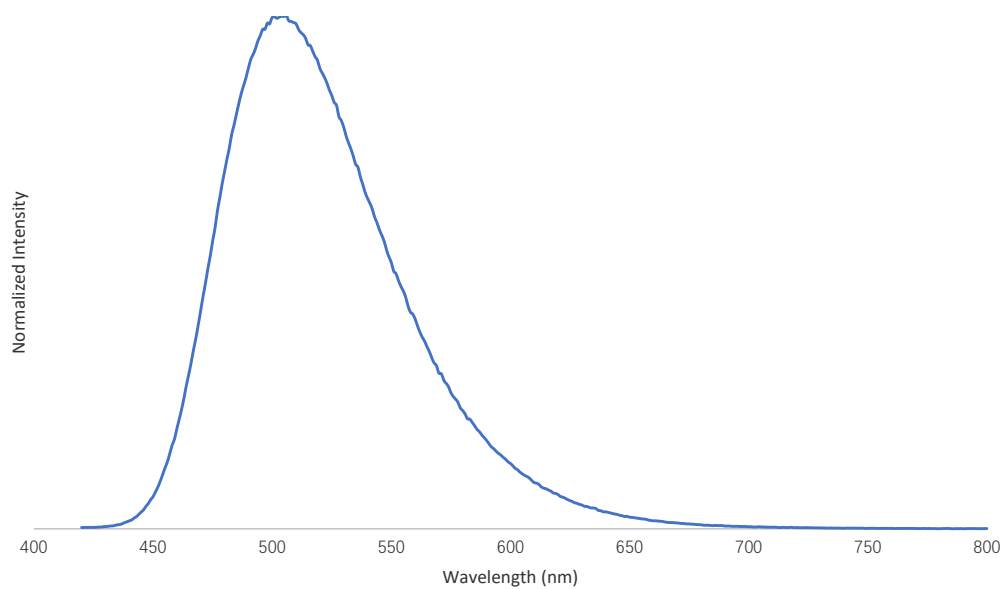

**Figure S34** Emission spectrum of compound **1m**

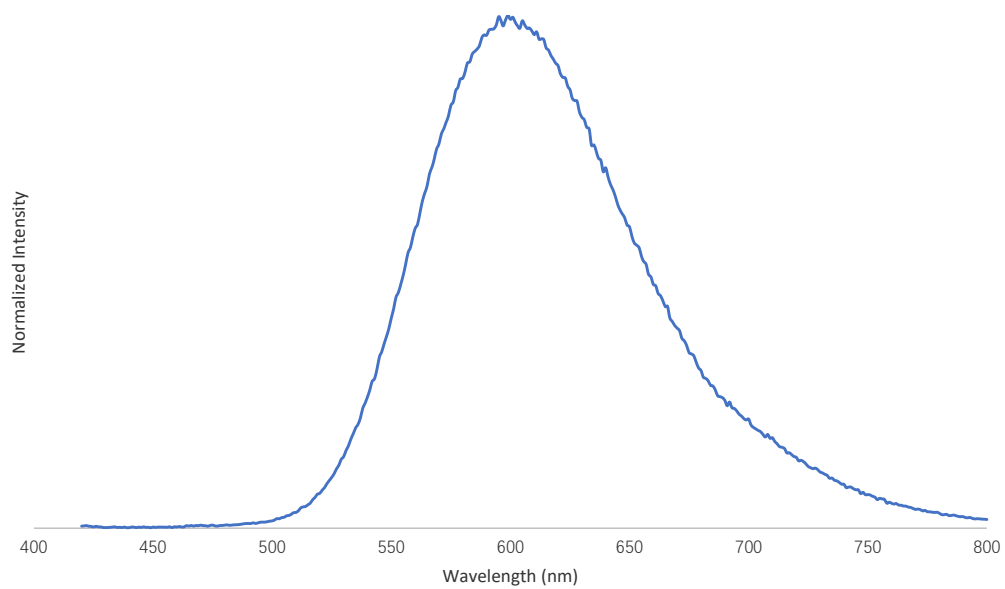

**Figure S35** Emission spectrum of compound **1n**



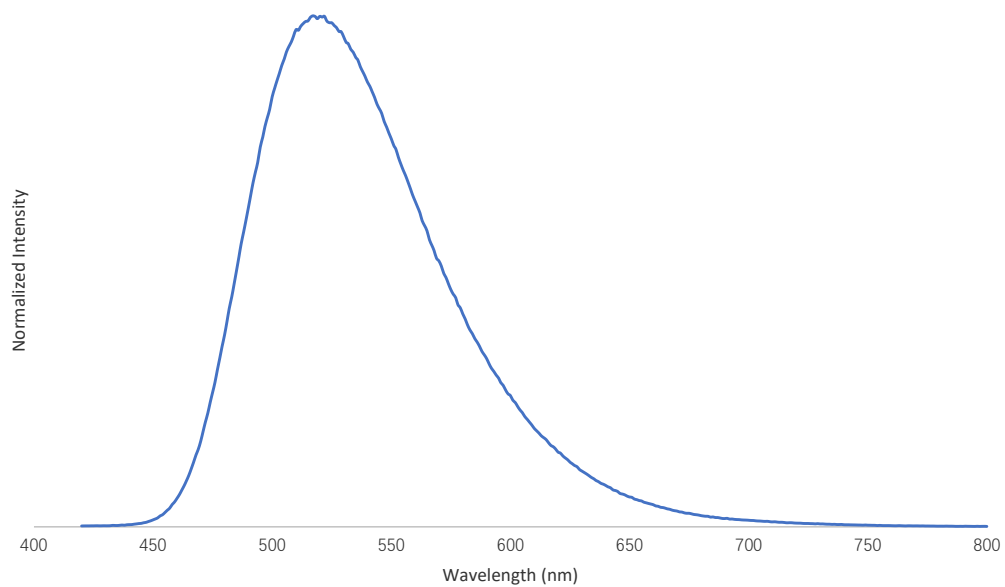

**Figure S36** Emission spectrum of compound **1o**

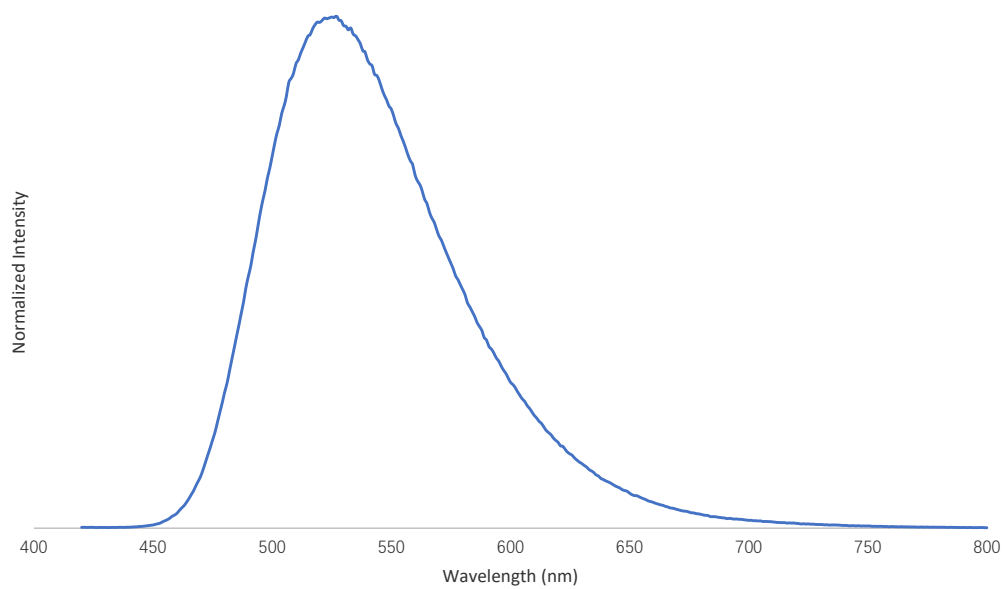

**Figure S37** Emission spectrum of compound **1p**

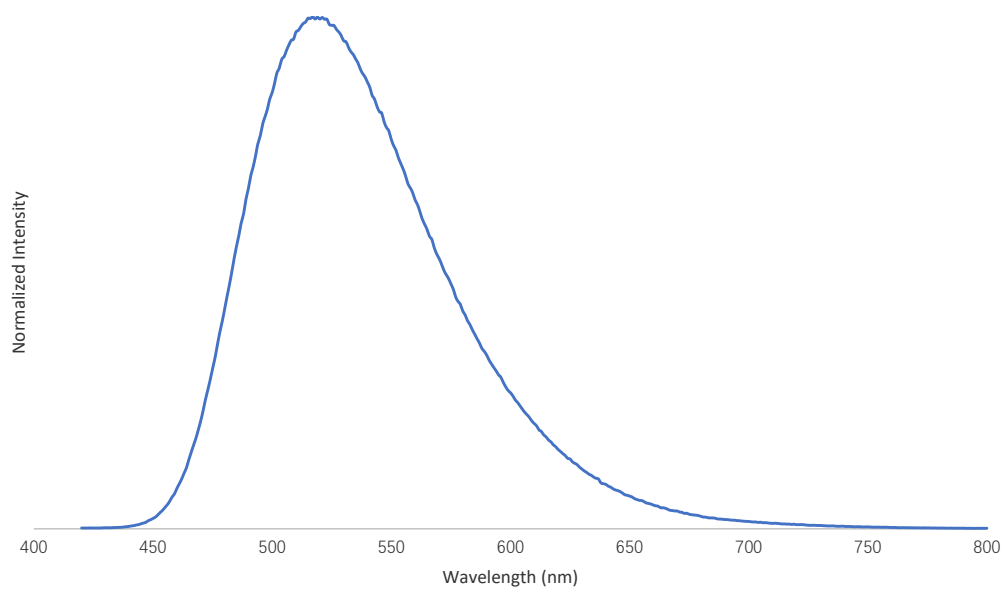

**Figure S38** Emission spectrum of compound **1q**

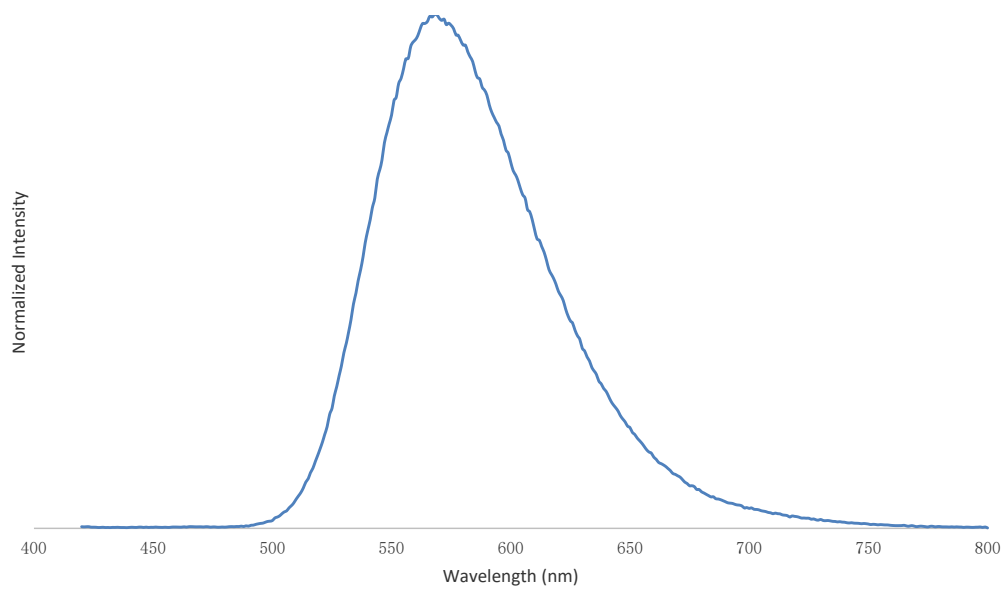

**Figure S39** Emission spectrum of compound **1r**

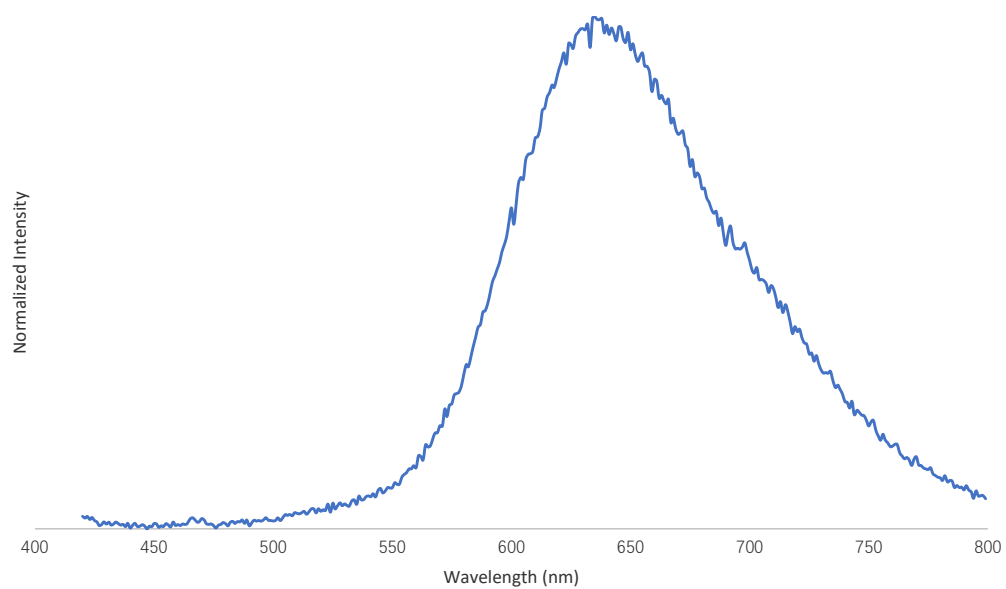

**Figure S40** Emission spectrum of compound **1s**

## DFT Calculations

All calculations were performed using Gaussian 16/A.03.<sup>1</sup> The counter ion was omitted for all calculations. DFT geometry optimizations were performed using B3LYP/Def2SVPP functional/basis set.<sup>2-3</sup> Frequency calculations were performed for the optimized structures. No imaginary vibrational frequency was encountered confirming the optimized stationary point to be local minimum. TD-DFT calculations were conducted for the first 32 excited states and the CH<sub>2</sub>Cl<sub>2</sub> PCM solvent model was used.<sup>4</sup> Natural transition orbitals (NTOs) were calculated for the excited state S<sub>1</sub> for compounds **1b** and **1c**.<sup>5</sup>

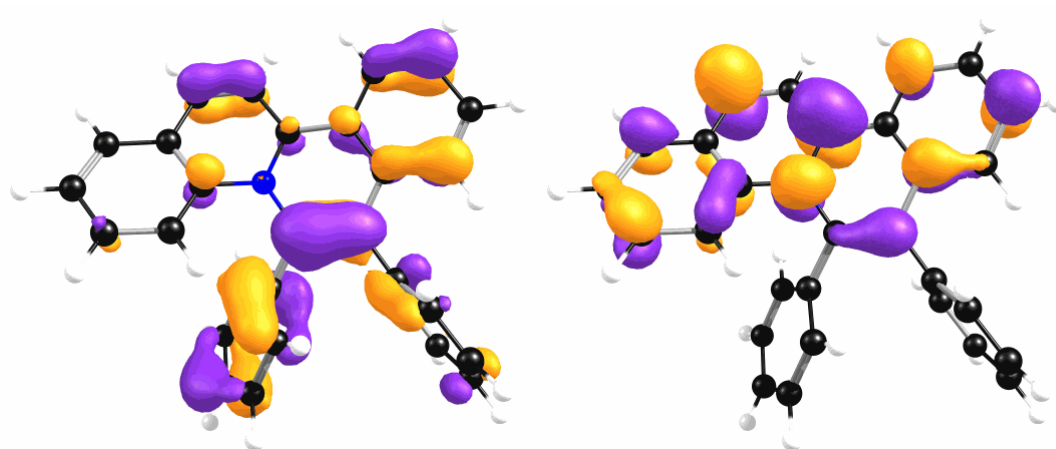

**Figure S41** (left) HOMO of compound **1b**; (right) LUMO of compound **1b** (isovalue = 0.04).

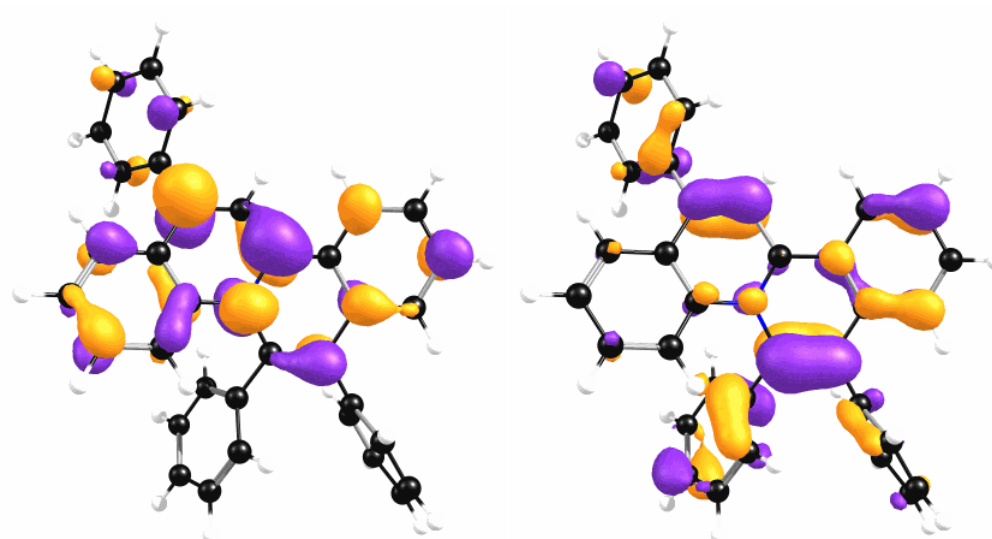

**Figure S42** (left) HOMO of compound **1c**; (right) LUMO of compound **1c** (isovalue = 0.04).

**Table S5** TD-DFT excitation energies and oscillator strengths ( $f$ ) of **1b** and **1c**.

| Compound <b>1b</b> |        |        |        | Compound <b>1c</b> |        |        |        |
|--------------------|--------|--------|--------|--------------------|--------|--------|--------|
| excited state      | nm     | eV     | $f$    | excited state      | nm     | eV     | $f$    |
| 1                  | 428.67 | 2.8923 | 0.1351 | 1                  | 443.03 | 2.7986 | 0.3421 |
| 2                  | 382.05 | 3.2452 | 0.0595 | 2                  | 390.47 | 3.1753 | 0.1216 |
| 3                  | 372    | 3.3329 | 0.0102 | 3                  | 374.55 | 3.3102 | 0.009  |
| 4                  | 357.48 | 3.4683 | 0.0487 | 4                  | 364.73 | 3.3993 | 0.0638 |
| 5                  | 354.19 | 3.5005 | 0.0755 | 5                  | 357.44 | 3.4686 | 0.0131 |
| 6                  | 343.57 | 3.6087 | 0.0009 | 6                  | 352.1  | 3.5213 | 0.0101 |
| 7                  | 318.89 | 3.888  | 0.2744 | 7                  | 345.37 | 3.5899 | 0.0067 |
| 8                  | 308.56 | 4.0182 | 0.0116 | 8                  | 340.35 | 3.6428 | 0.0585 |
| 9                  | 296.8  | 4.1774 | 0.1841 | 9                  | 321.15 | 3.8606 | 0.3571 |
| 10                 | 292.23 | 4.2427 | 0.1816 | 10                 | 309.58 | 4.0049 | 0.0303 |
| 11                 | 284.61 | 4.3563 | 0.1787 | 11                 | 300.27 | 4.1291 | 0.2699 |
| 12                 | 284.12 | 4.3638 | 0.1385 | 12                 | 293.67 | 4.2219 | 0.0685 |
| 13                 | 277.86 | 4.462  | 0.0533 | 13                 | 290.38 | 4.2697 | 0.0077 |
| 14                 | 275.59 | 4.4989 | 0.2415 | 14                 | 286.96 | 4.3206 | 0.0493 |
| 15                 | 261.88 | 4.7345 | 0.1826 | 15                 | 279.06 | 4.4429 | 0.2024 |
| 16                 | 255.19 | 4.8585 | 0.1118 | 16                 | 276.28 | 4.4876 | 0.0691 |
| 17                 | 251.09 | 4.9378 | 0.0254 | 17                 | 270.88 | 4.577  | 0.0102 |
| 18                 | 249.71 | 4.9651 | 0.0485 | 18                 | 266.26 | 4.6566 | 0.1342 |
| 19                 | 246.95 | 5.0207 | 0.0853 | 19                 | 263.03 | 4.7137 | 0.1896 |
| 20                 | 245    | 5.0606 | 0.0704 | 20                 | 256.3  | 4.8375 | 0.085  |
| 21                 | 242.89 | 5.1046 | 0.023  | 21                 | 253.38 | 4.8932 | 0.0792 |
| 22                 | 240.46 | 5.1562 | 0.0048 | 22                 | 251.52 | 4.9294 | 0.0263 |
| 23                 | 238.31 | 5.2025 | 0.02   | 23                 | 250.82 | 4.9431 | 0.1487 |
| 24                 | 236.34 | 5.246  | 0.0348 | 24                 | 247.32 | 5.0131 | 0.0204 |
| 25                 | 233.86 | 5.3015 | 0.0049 | 25                 | 246.06 | 5.0387 | 0.0335 |
| 26                 | 229.92 | 5.3925 | 0.0194 | 26                 | 244.38 | 5.0734 | 0.0373 |
| 27                 | 226.4  | 5.4764 | 0.0222 | 27                 | 241.42 | 5.1357 | 0.0102 |
| 28                 | 224.34 | 5.5266 | 0.0404 | 28                 | 239.04 | 5.1868 | 0.0858 |
| 29                 | 222.72 | 5.5668 | 0.0074 | 29                 | 238.78 | 5.1925 | 0.0124 |
| 30                 | 221.01 | 5.6099 | 0.0052 | 30                 | 236.23 | 5.2485 | 0.0067 |
| 31                 | 220.06 | 5.6341 | 0.0081 | 31                 | 234.62 | 5.2844 | 0.0055 |
| 32                 | 219.74 | 5.6424 | 0.0632 | 32                 | 233.98 | 5.2989 | 0.0297 |

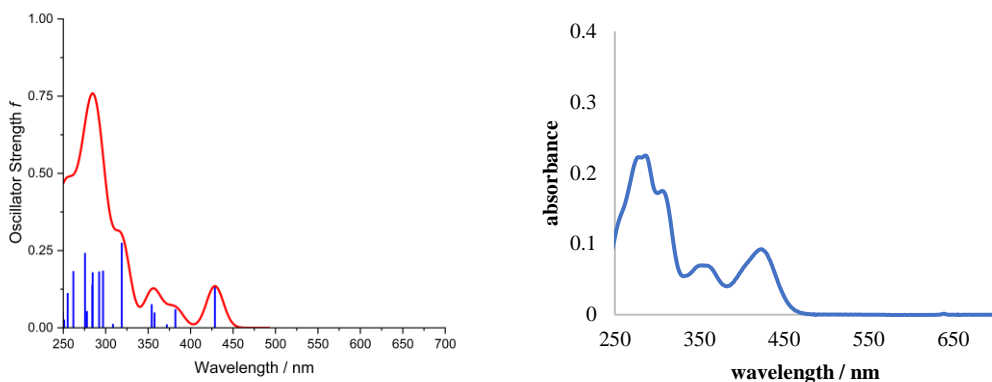

**Figure S43** Left: Simulated absorption spectrum of **1b** assuming a Gaussian line-shape for each transition, with width 25 nm. Calculated for the first 64 excited states. Right: Experimental absorption spectrum of **1b**.

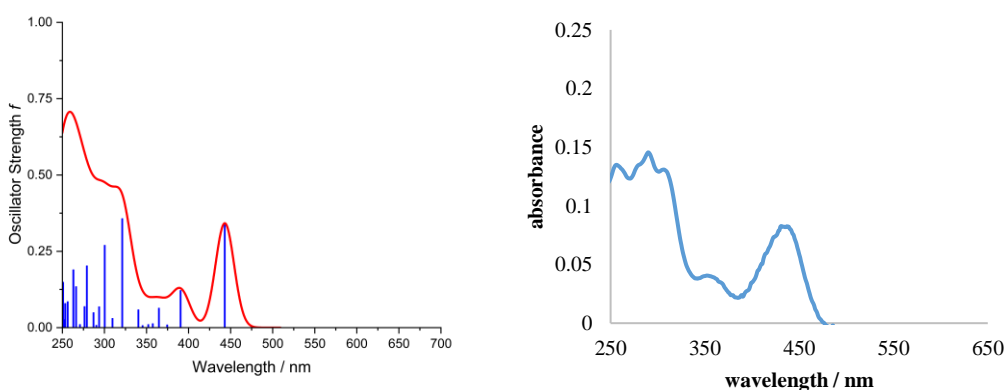

**Figure S44** Left: Simulated absorption spectrum of **1c** assuming a Gaussian line-shape for each transition, with width 25 nm. Calculated for the first 64 excited states. Right: Experimental absorption spectrum of **1c**.

1. Gaussian 09, Revision A.02, M. J. Frisch, G. W. Trucks, H. B. Schlegel, G. E. Scuseria, M. A. Robb, J. R. Cheeseman, G. Scalmani, V. Barone, G. A. Petersson, H. Nakatsuji, X. Li, M. Caricato, A. Marenich, J. Bloino, B. G. Janesko, R. Gomperts, B. Mennucci, H. P. Hratchian, J. V. Ortiz, A. F. Izmaylov, J. L. Sonnenberg, D. Williams-Young, F. Ding, F. Lipparini, F. Egidi, J. Goings, B. Peng, A. Petrone, T. Henderson, D. Ranasinghe, V. G. Zakrzewski, J. Gao, N. Rega, G. Zheng, W. Liang, M. Hada, M. Ehara, K. Toyota, R. Fukuda, J. Hasegawa, M. Ishida, T. Nakajima, Y. Honda, O. Kitao, H. Nakai, T. Vreven, K. Throssell, J. A. Montgomery, Jr., J. E. Peralta, F. Ogliaro, M. Bearpark, J. J. Heyd, E. Brothers, K. N. Kudin, V. N. Staroverov, T. Keith, R. Kobayashi, J. Normand, K. Raghavachari,

- A. Rendell, J. C. Burant, S. S. Iyengar, J. Tomasi, M. Cossi, J. M. Millam, M. Klene, C. Adamo, R. Cammi, J. W. Ochterski, R. L. Martin, K. Morokuma, O. Farkas, J. B. Foresman, and D. J. Fox, Gaussian, Inc., Wallingford CT, **2016**.
2. J.-D. Chai and M. Head-Gordon, *Phys. Chem. Chem. Phys.*, **2008**, *10*, 6615.
  3. F. Weigend and R. Ahlrichs, *Phys. Chem. Chem. Phys.*, **2005**, *7*, 3297.
  4. Furche, F.; Ahlrichs, R. Adiabatic Time-Dependent Density Functional Methods for Excited State Properties. *J. Chem. Phys.* **2002**, *117*, 7433.
  5. Martin, R. L. Natural Transition Orbitals. *J. Chem. Phys.* **2003**, *118*, 4775.

# <sup>1</sup>H NMR S1i

yq-4-18-H

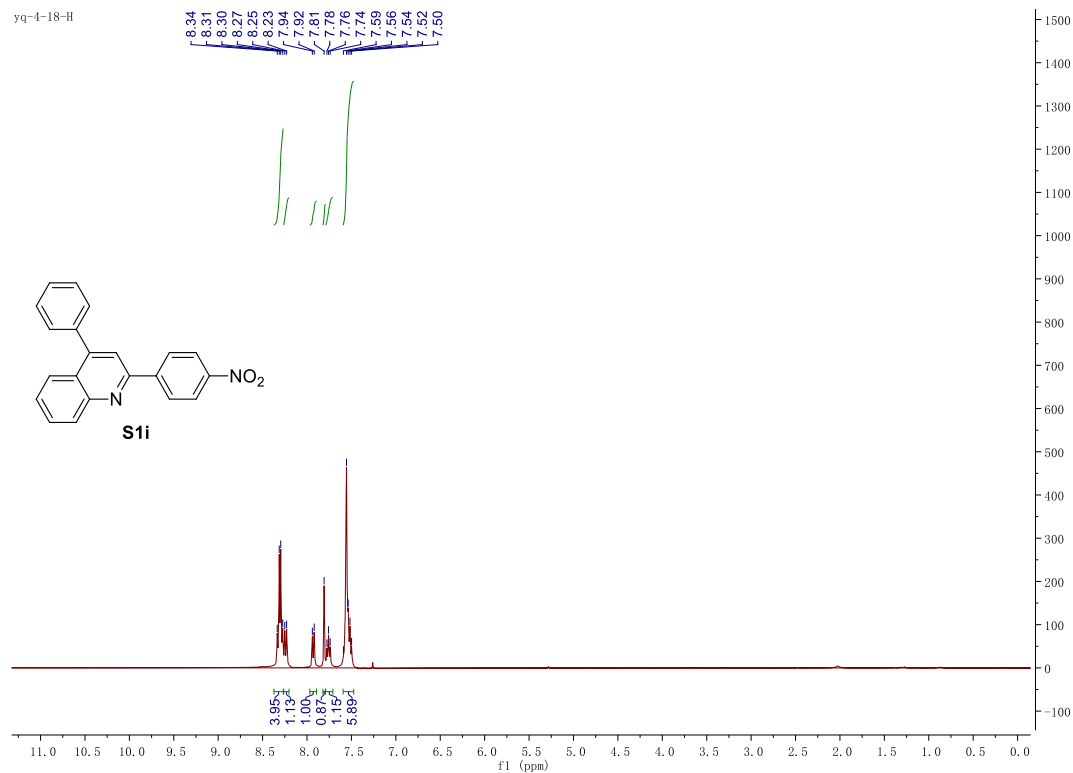

# <sup>13</sup>C NMR

yq-4-18-C

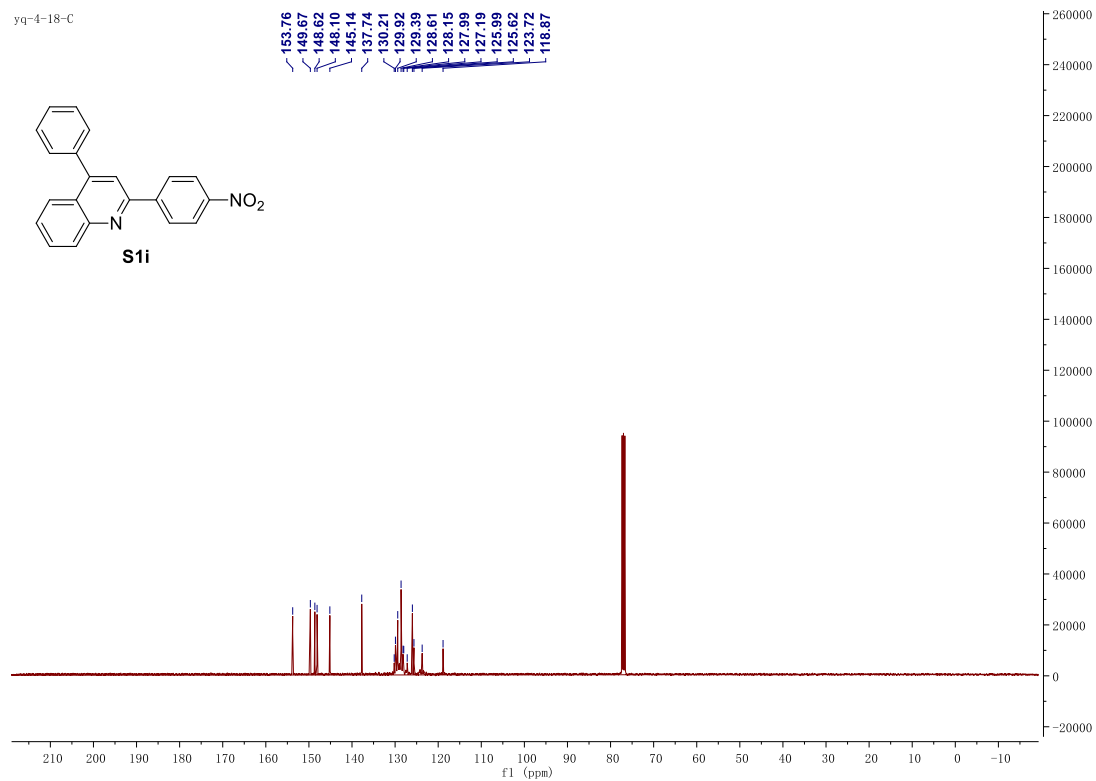



# <sup>1</sup>H NMR S1k

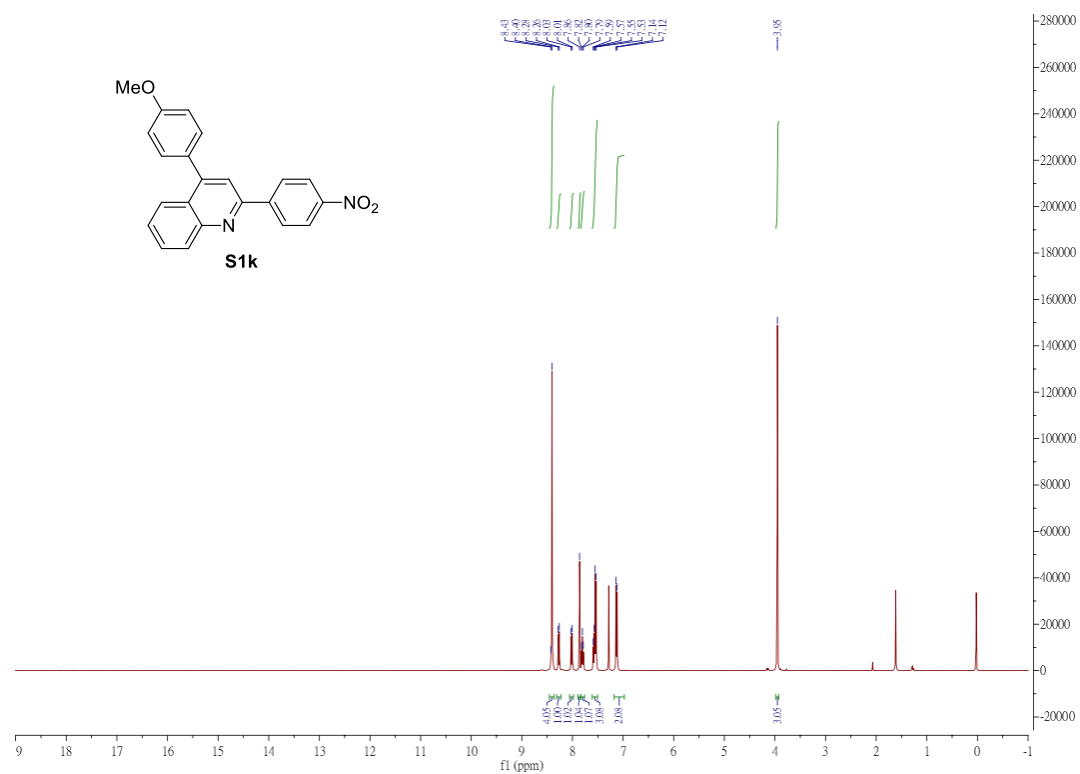

# <sup>13</sup>C NMR

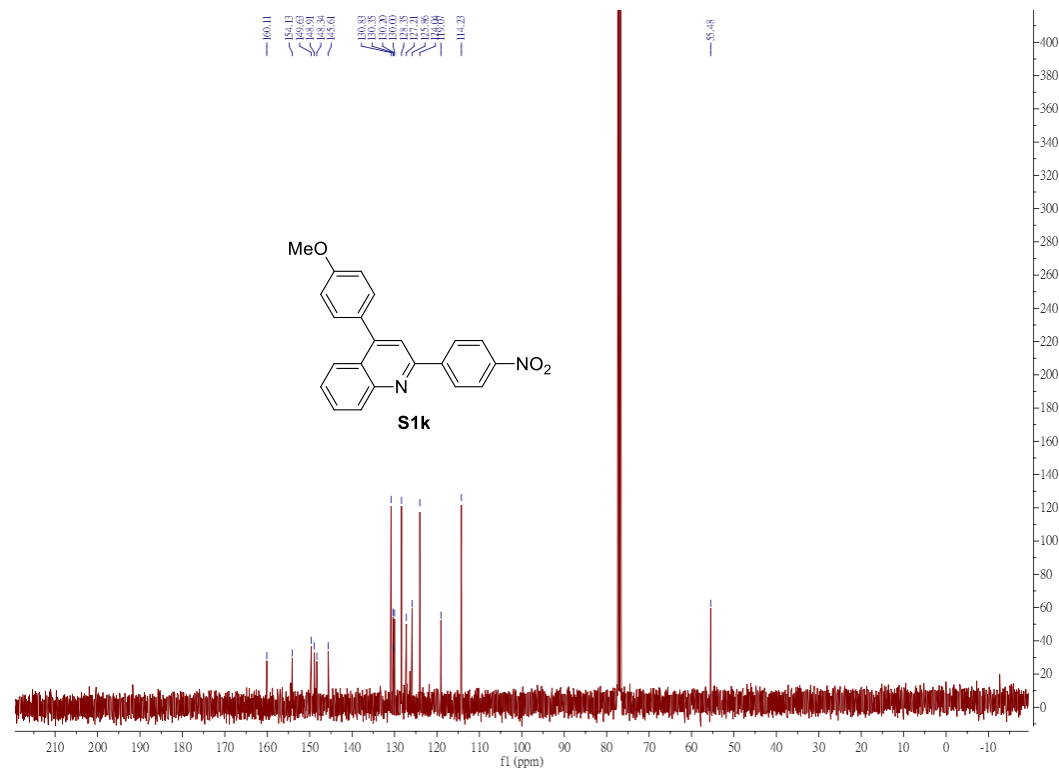



# <sup>19</sup>F NMR

a8f-400f

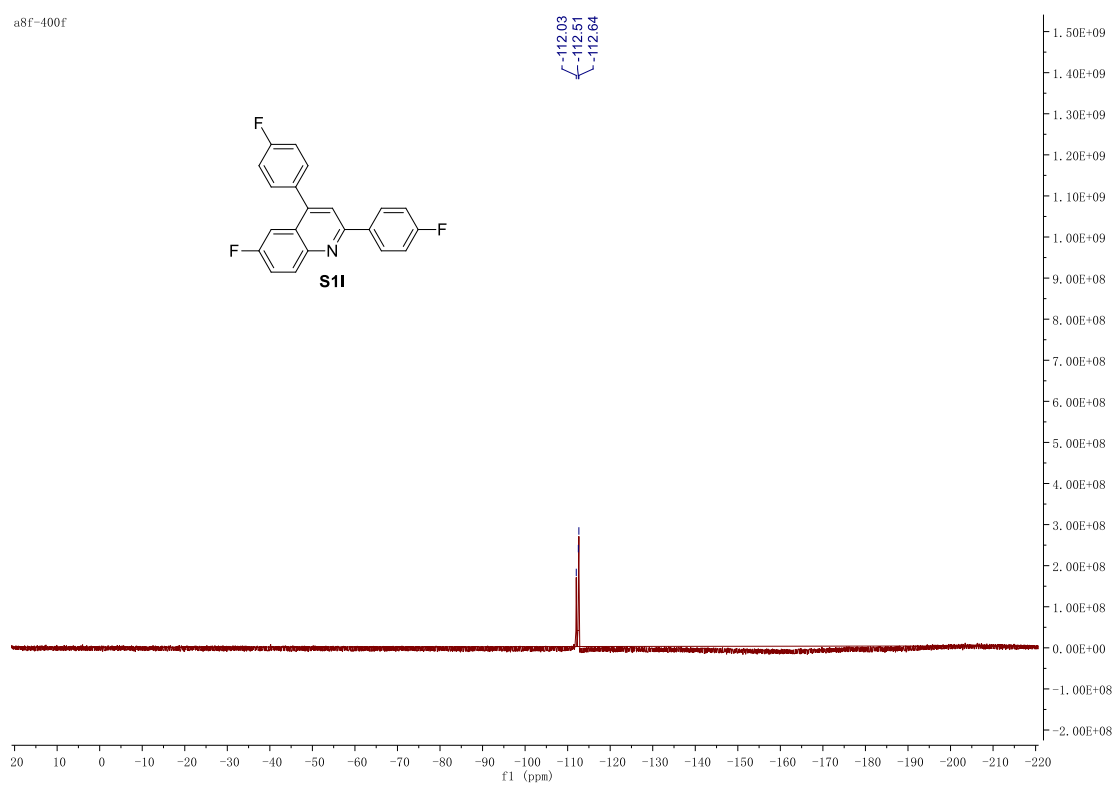

# $^1\text{H}$ NMR 1a

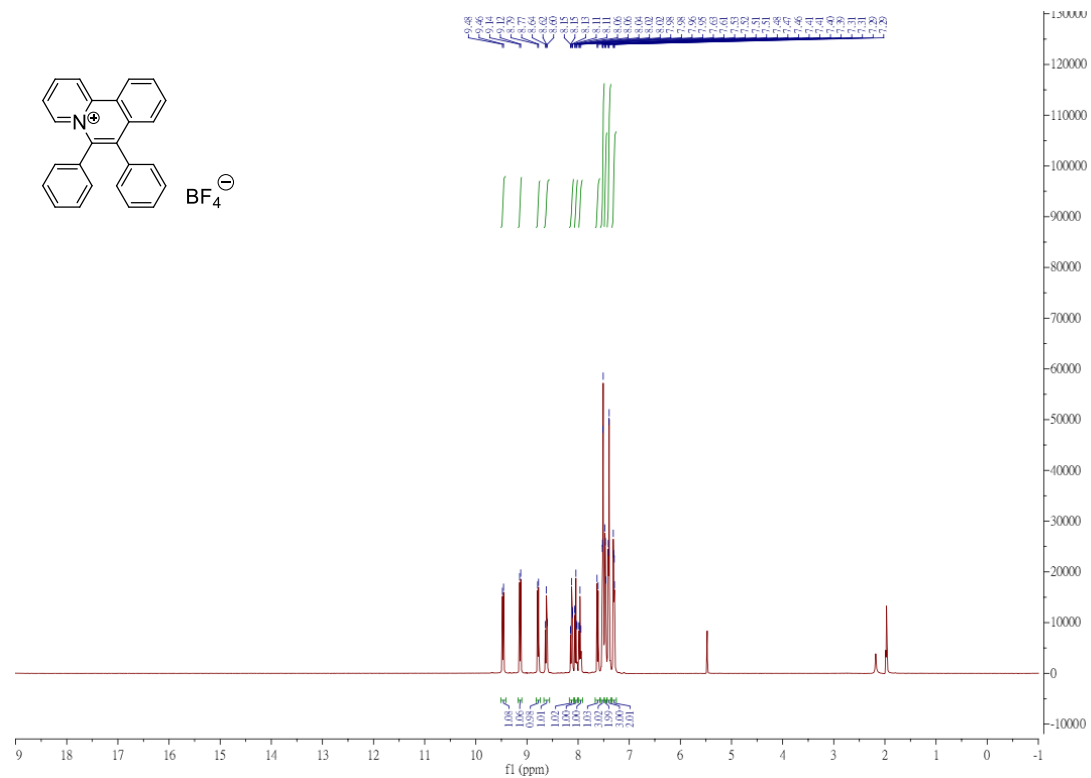

# $^{13}\text{C}$ NMR

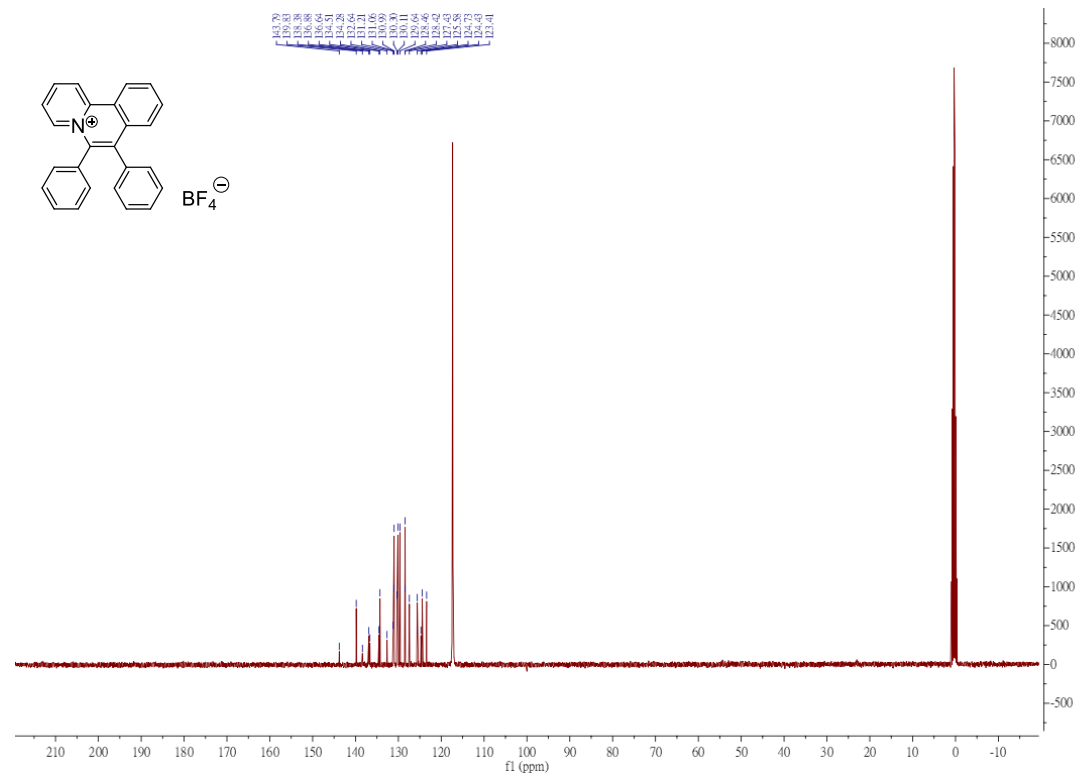

### <sup>1</sup>H NMR 1b

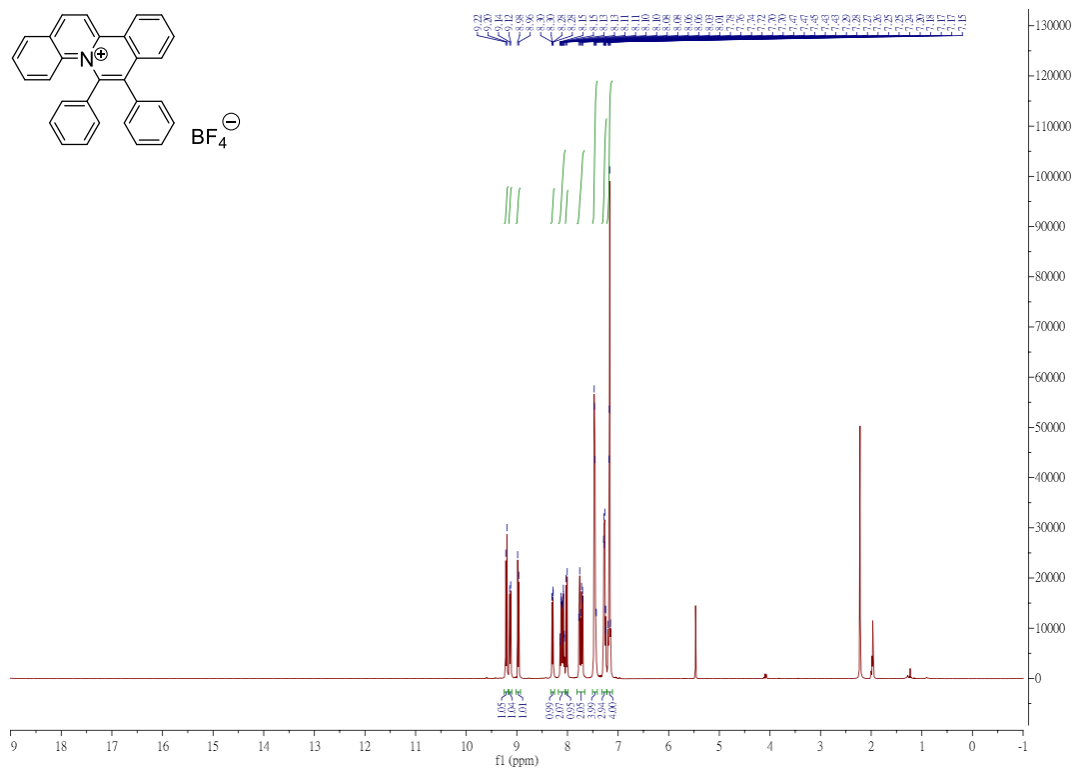

### <sup>13</sup>C NMR

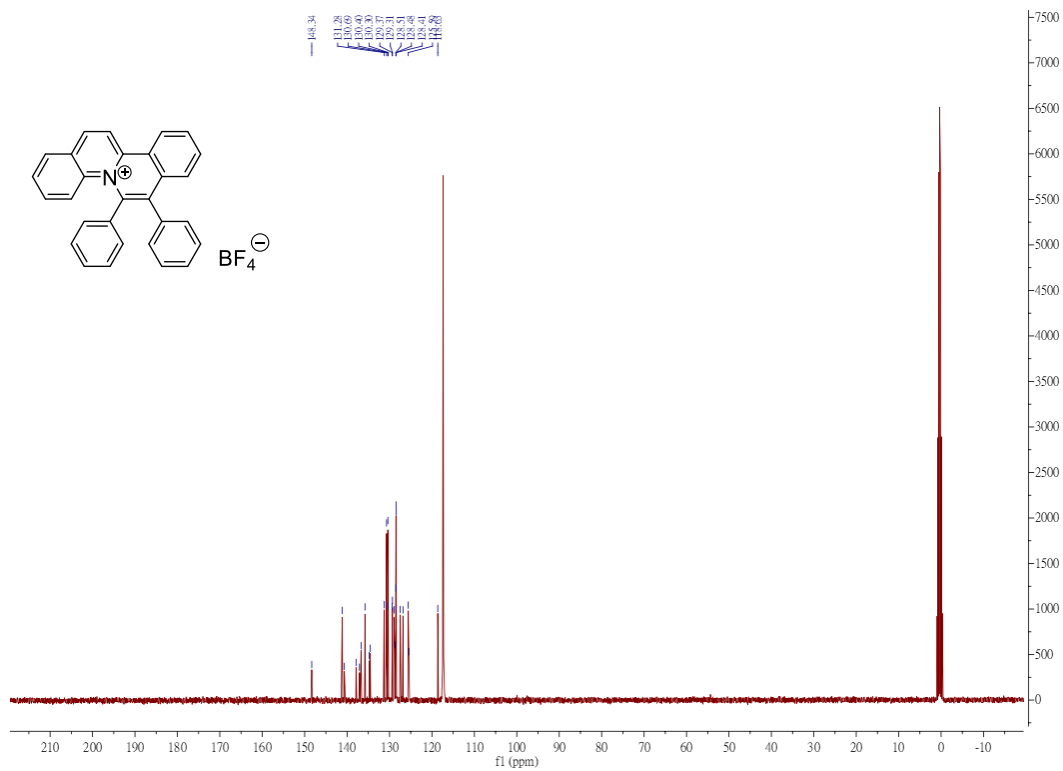

# <sup>1</sup>H NMR 1c

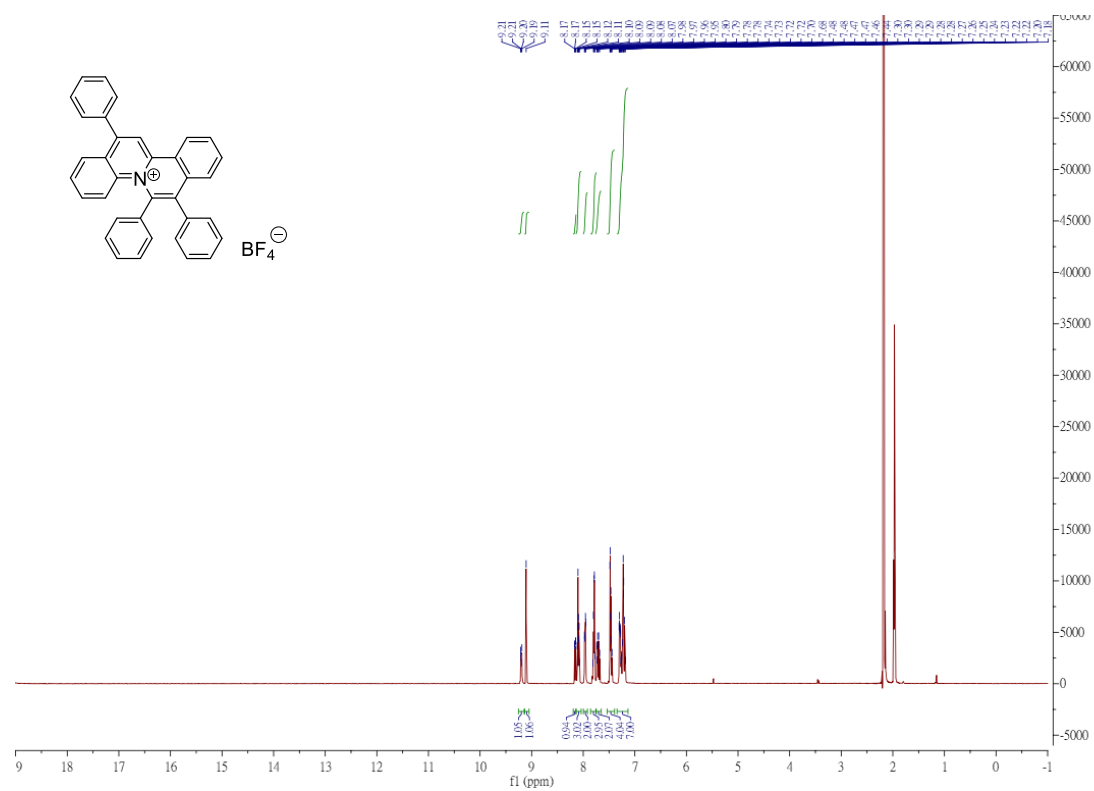

# <sup>13</sup>C NMR

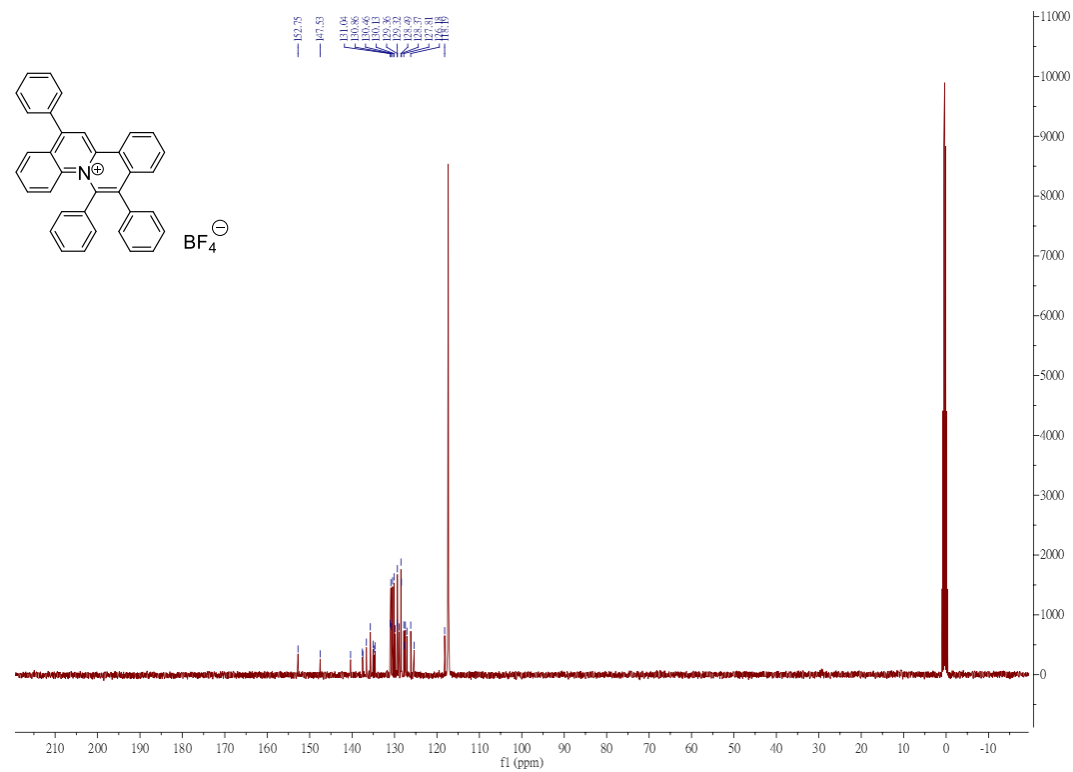

# <sup>1</sup>H NMR 1d

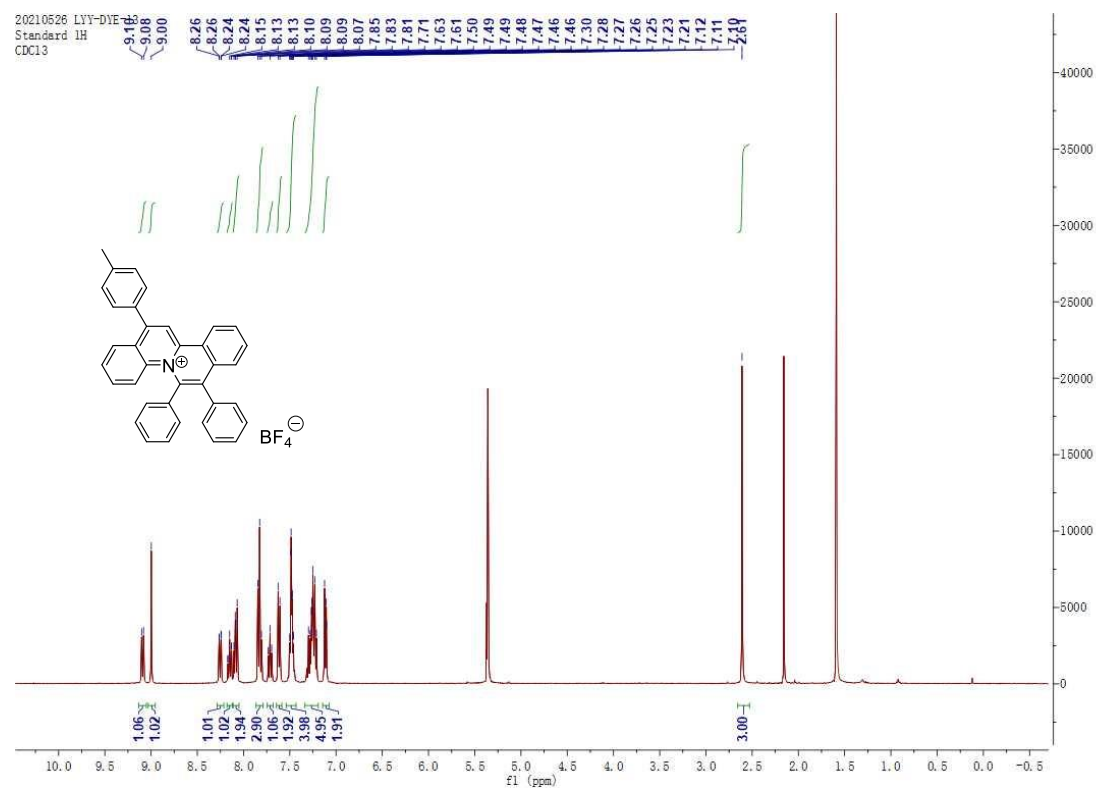

# <sup>13</sup>C NMR

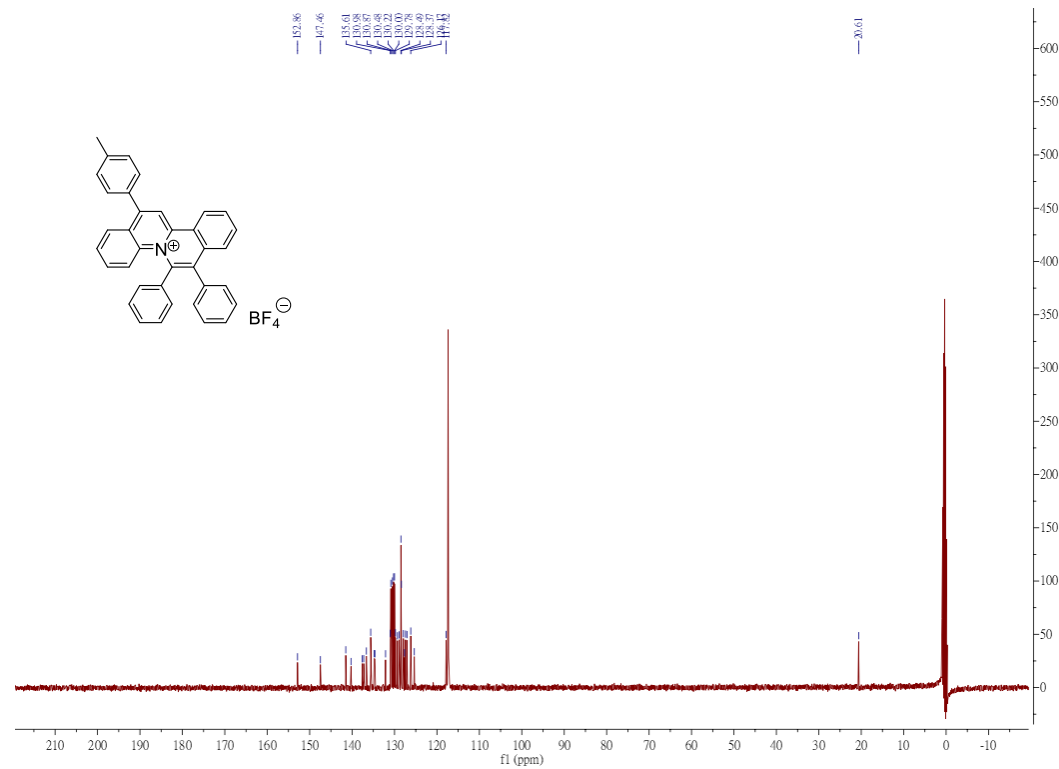

# <sup>1</sup>H NMR 1e

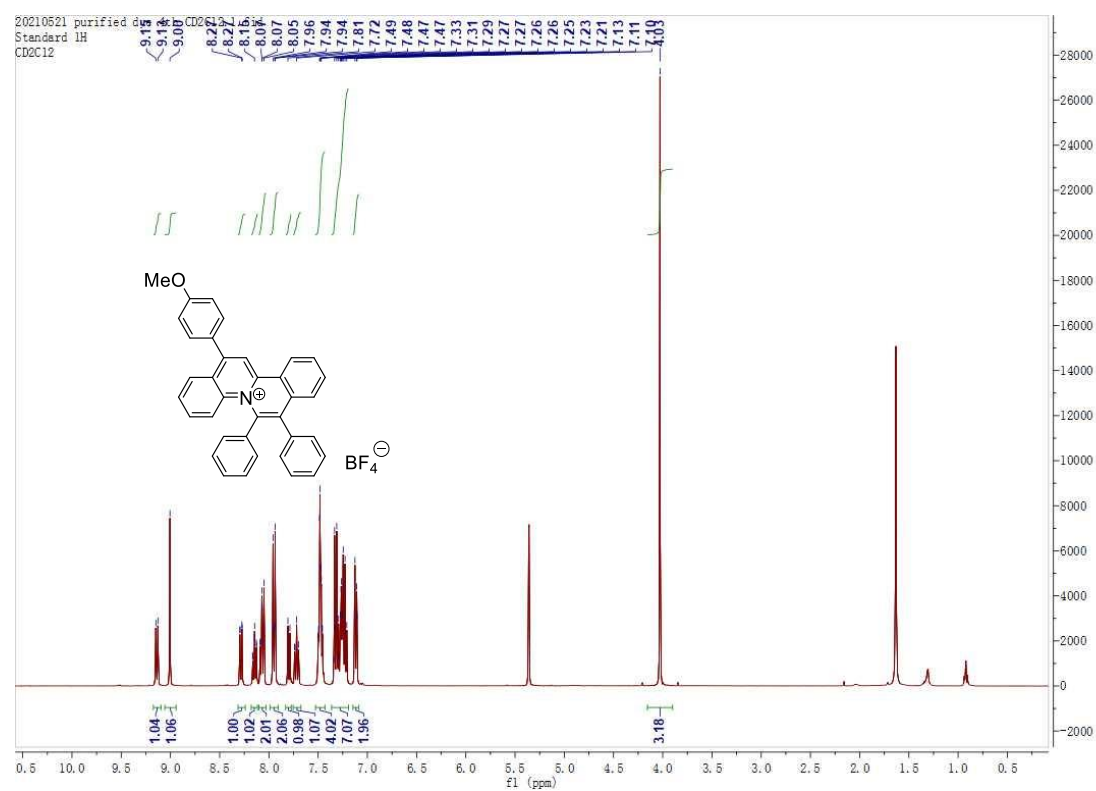

# <sup>13</sup>C NMR

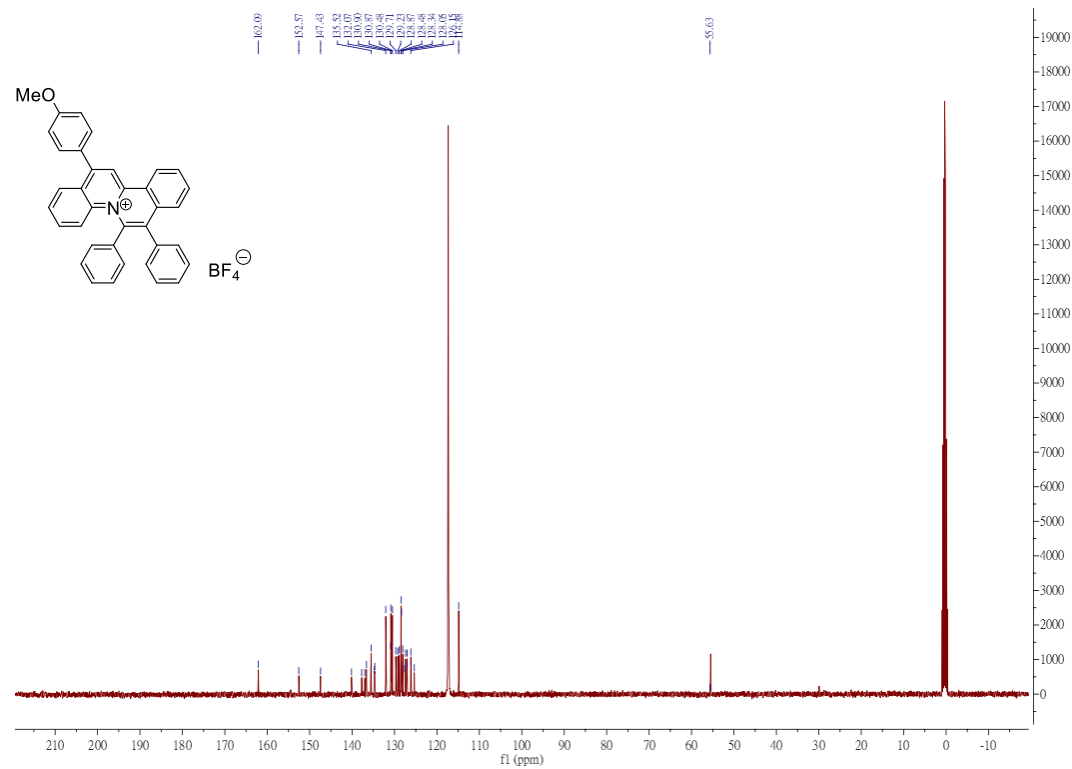



# <sup>1</sup>H NMR 1f

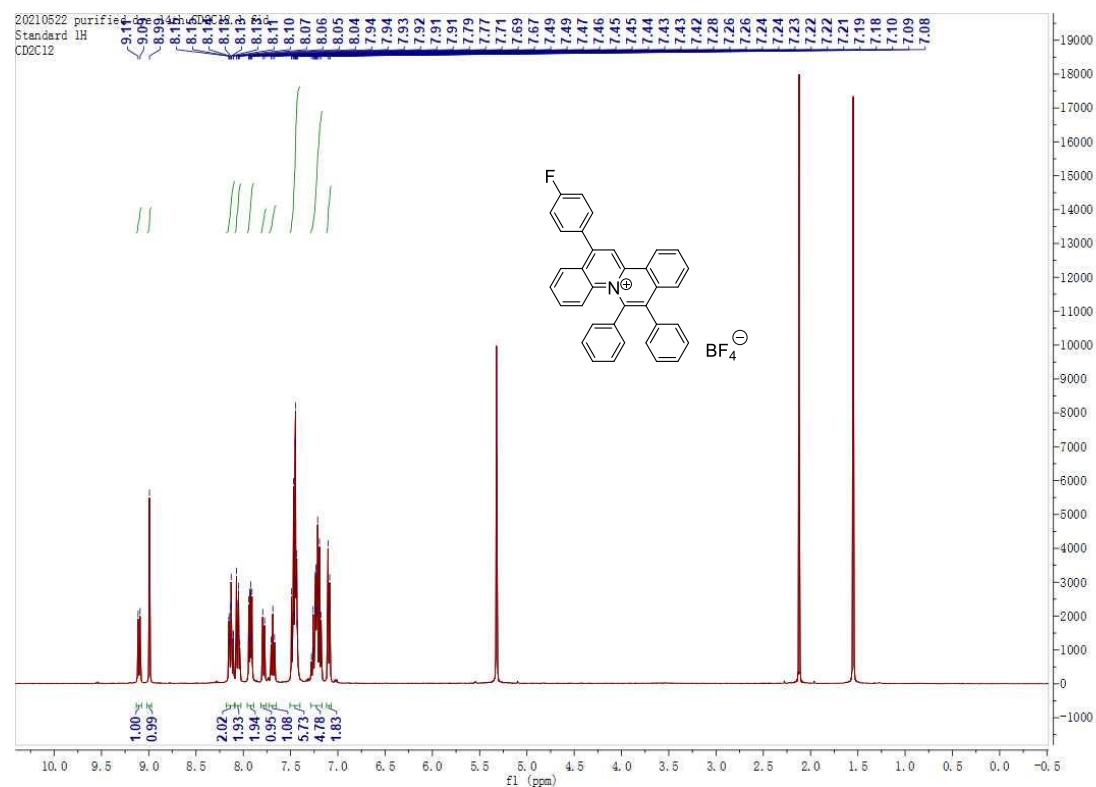

# <sup>13</sup>C NMR

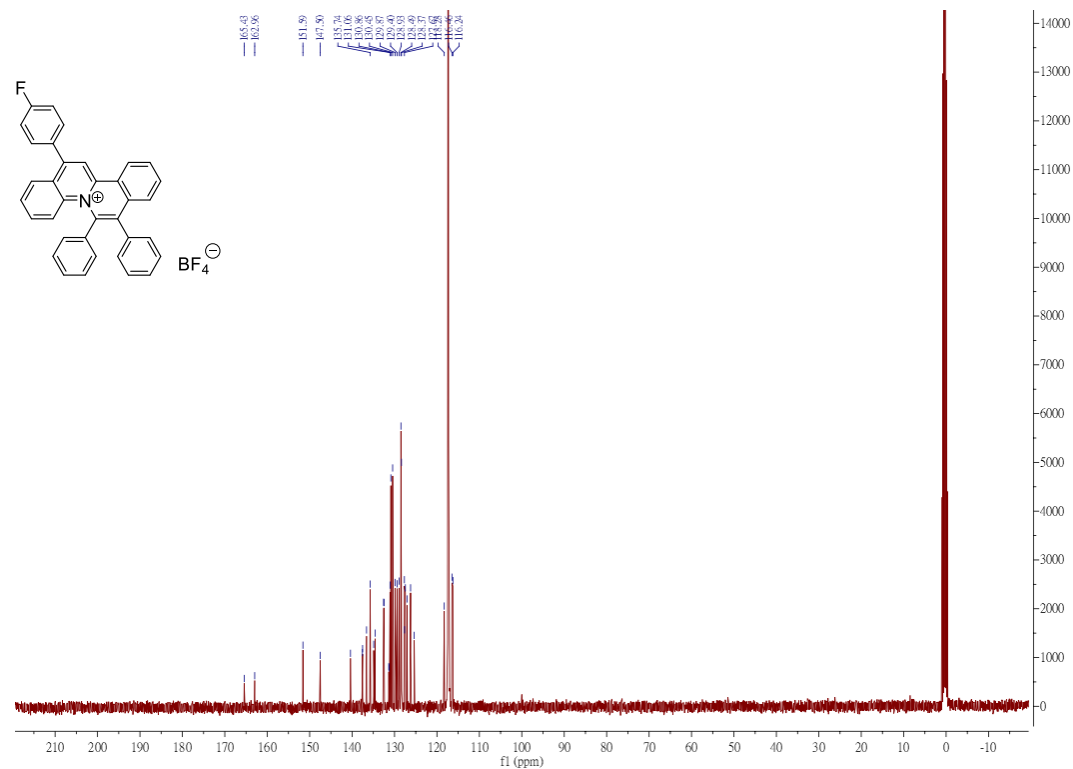

# <sup>19</sup>F NMR

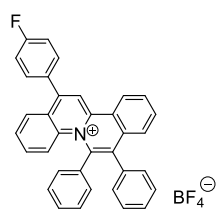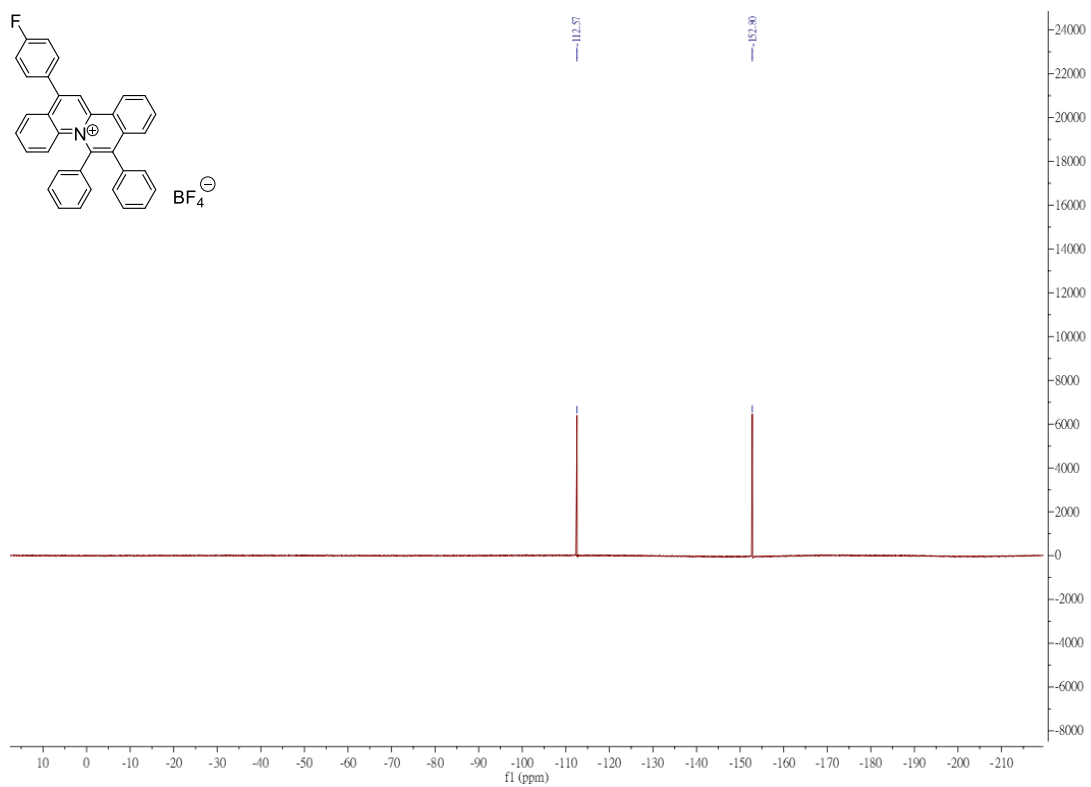

# <sup>1</sup>H NMR 1g

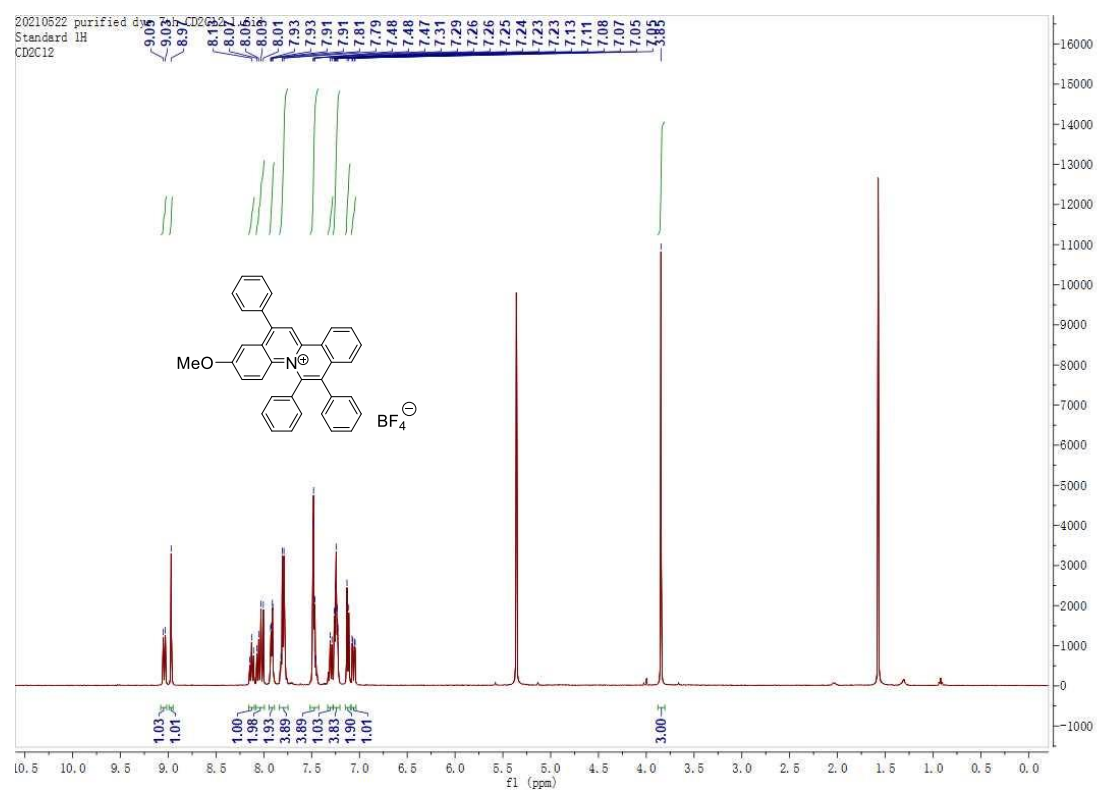

# <sup>13</sup>C NMR

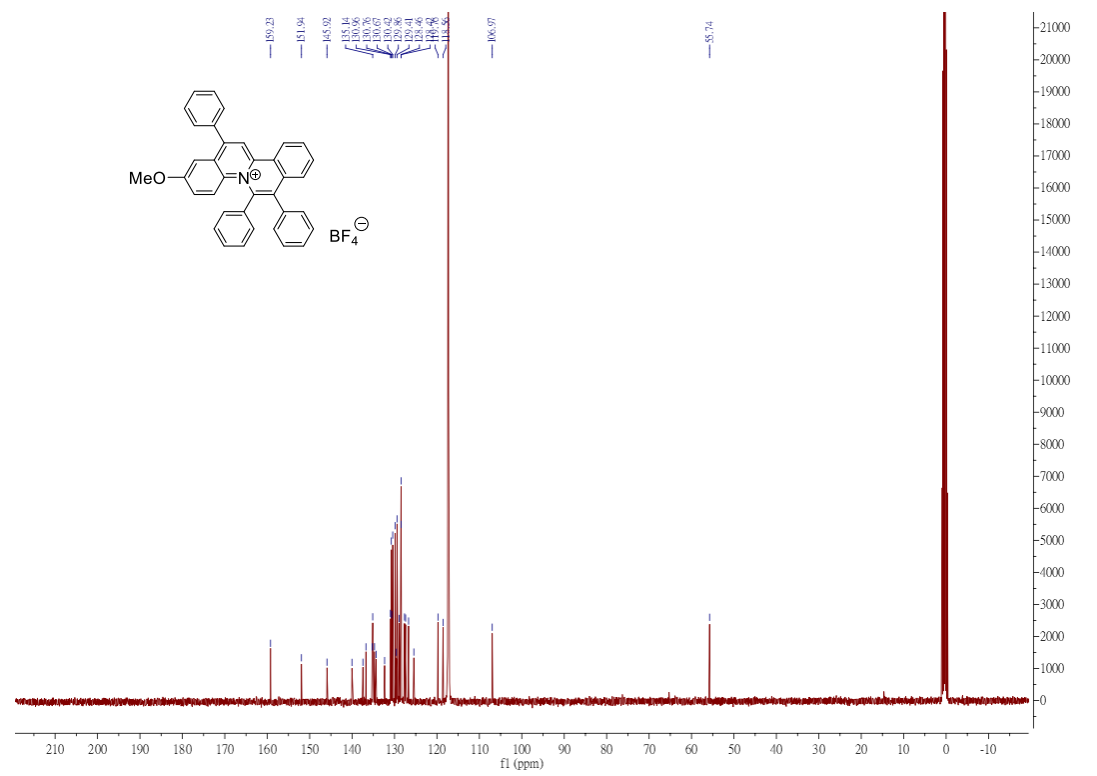

# $^1\text{H}$ NMR 1h

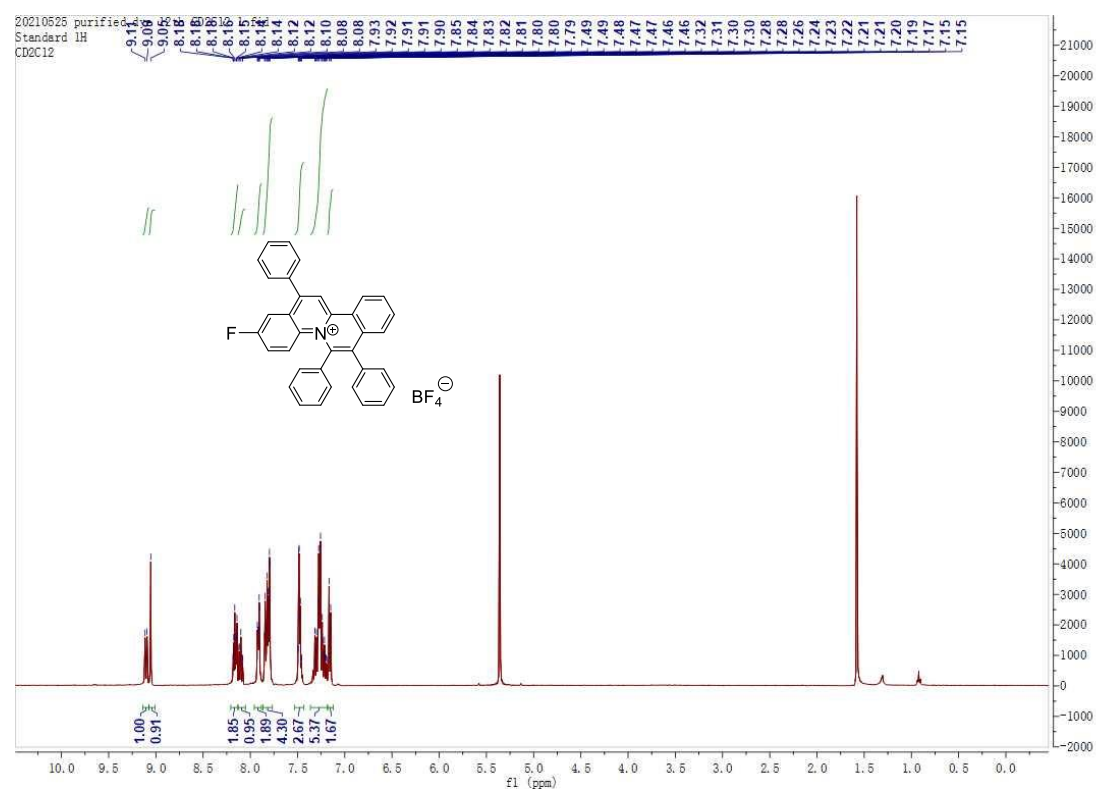

# $^{13}\text{C}$ NMR

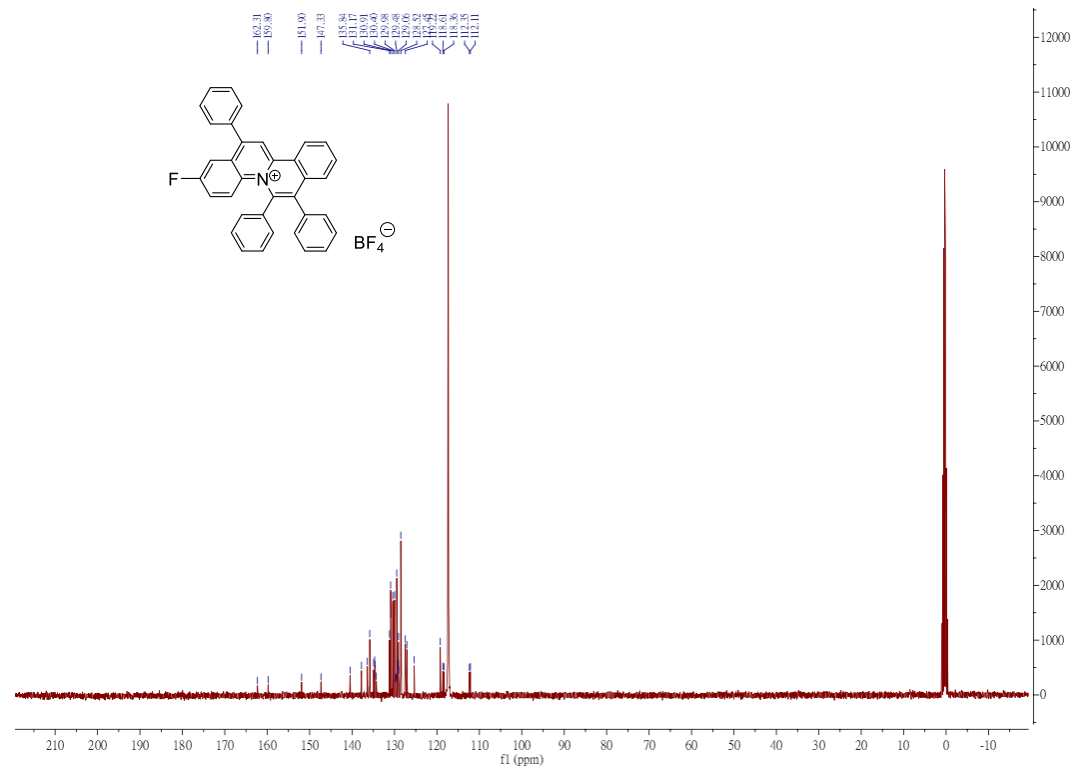

# <sup>19</sup>F NMR

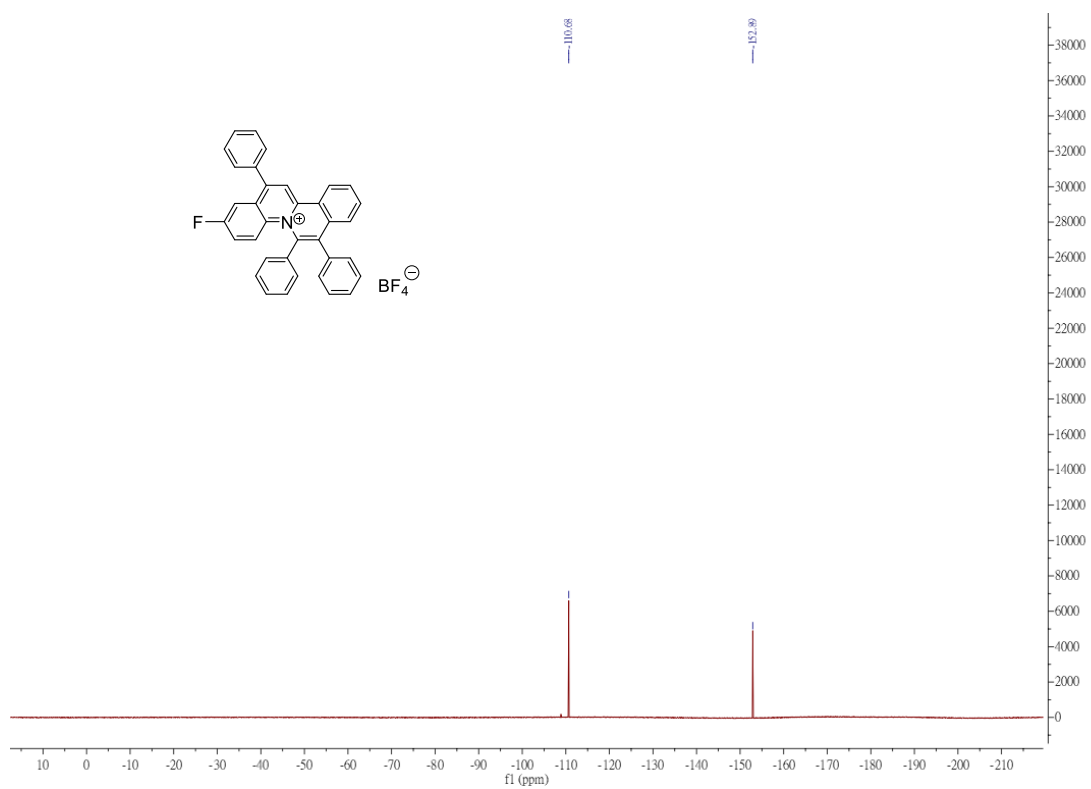

# <sup>1</sup>H NMR 1i

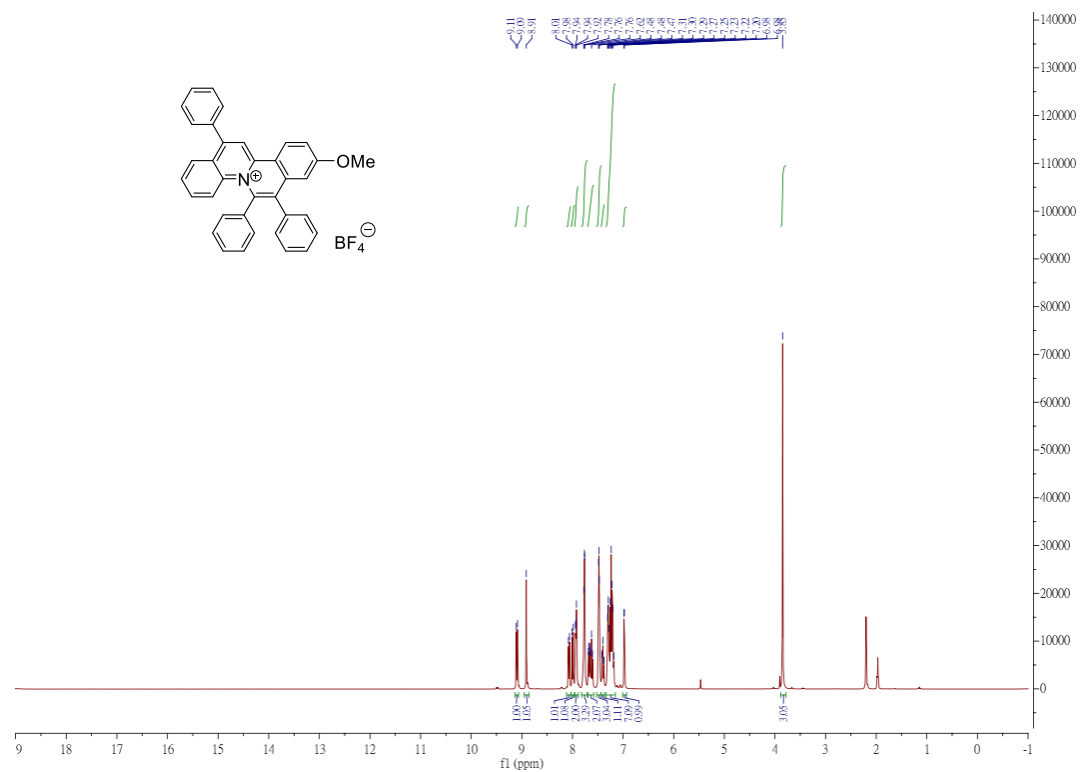

# <sup>13</sup>C NMR

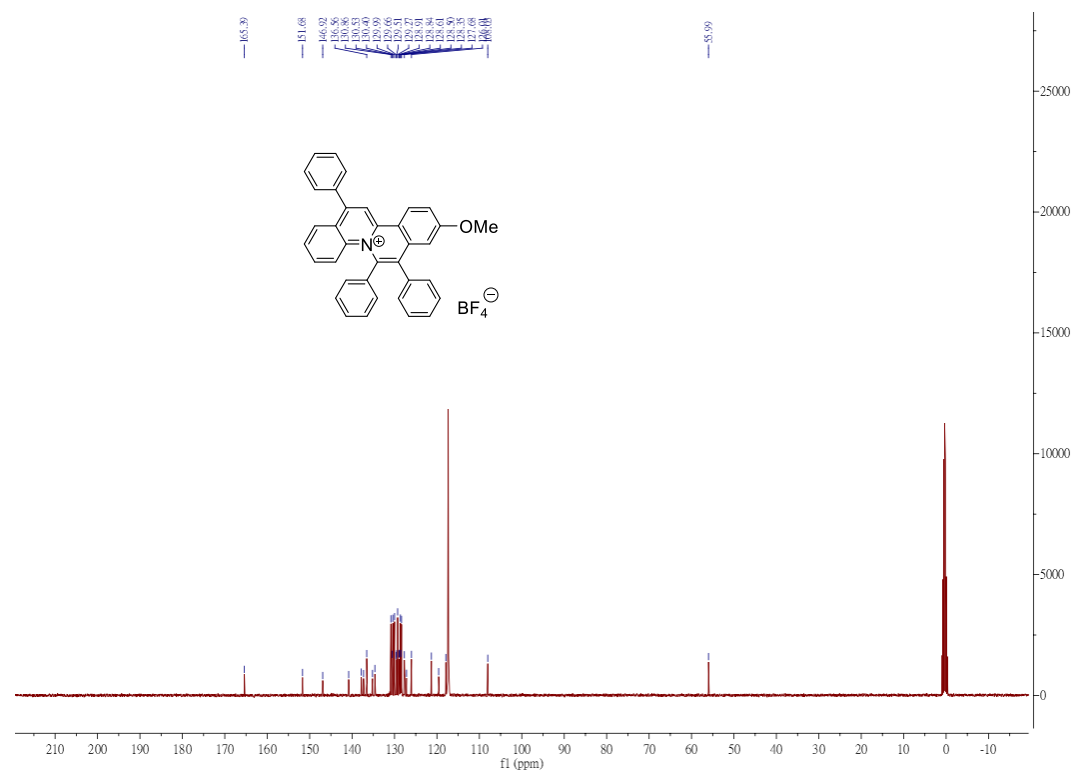

# <sup>1</sup>H NMR 1j

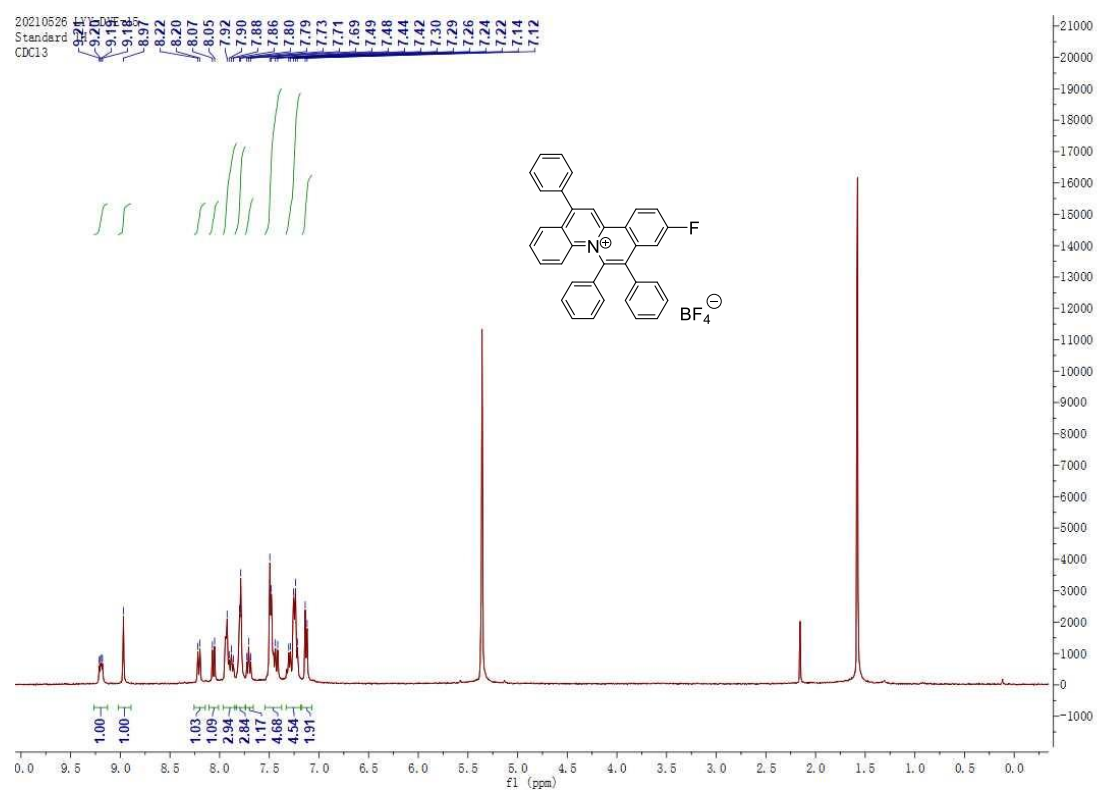

# <sup>13</sup>C NMR

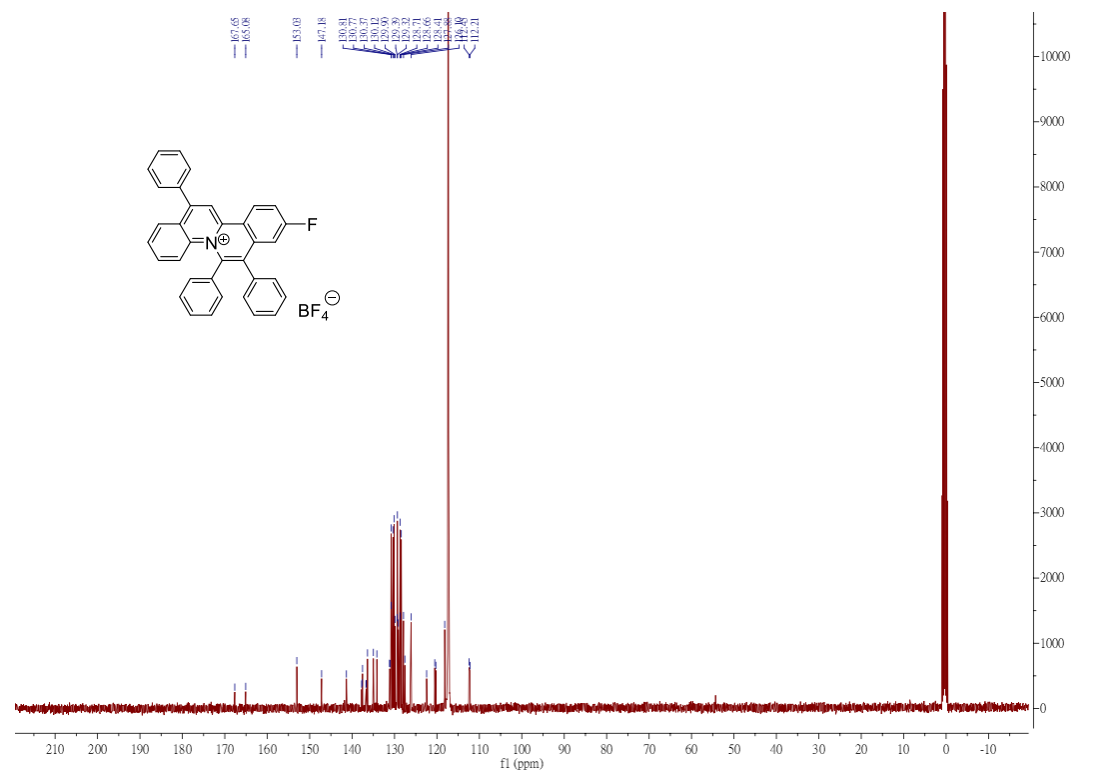

# $^{19}\text{F}$ NMR

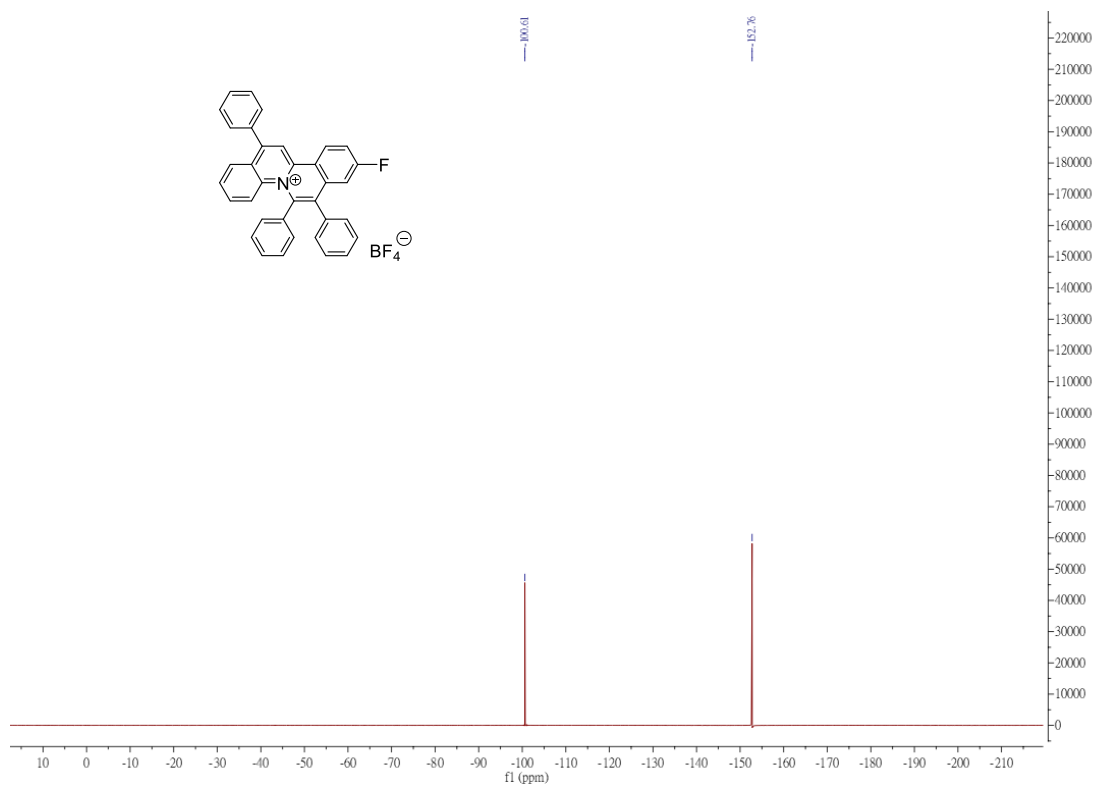



# <sup>1</sup>H NMR 1k

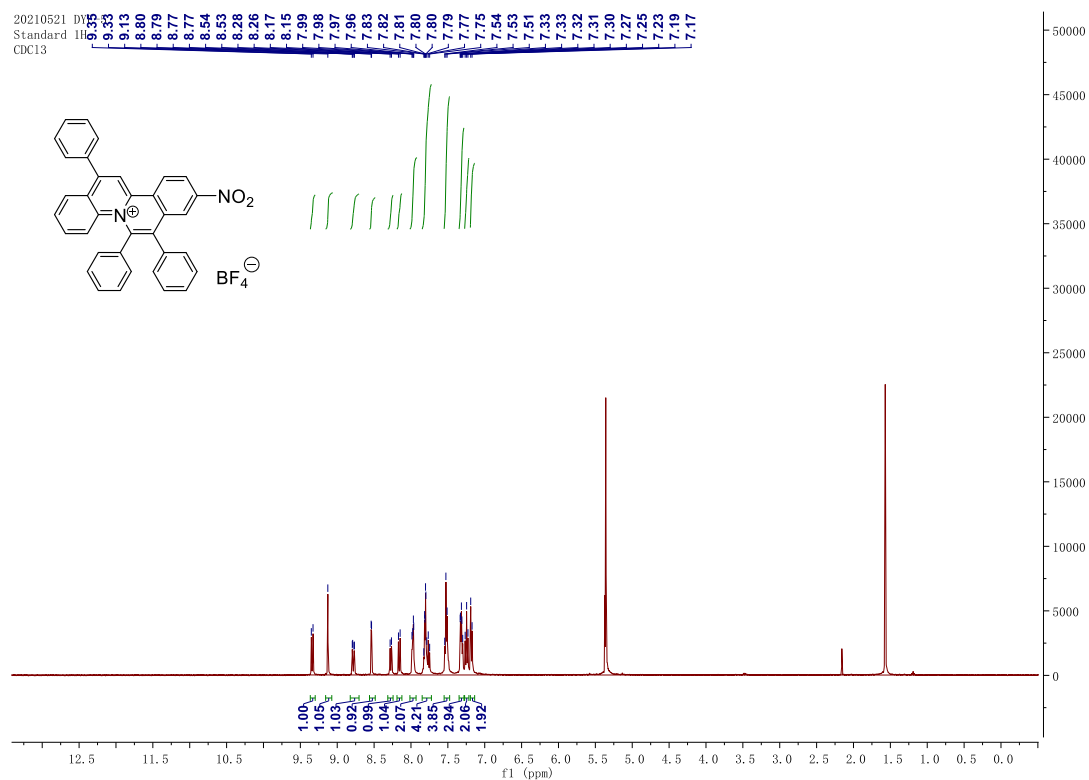

# <sup>13</sup>C NMR

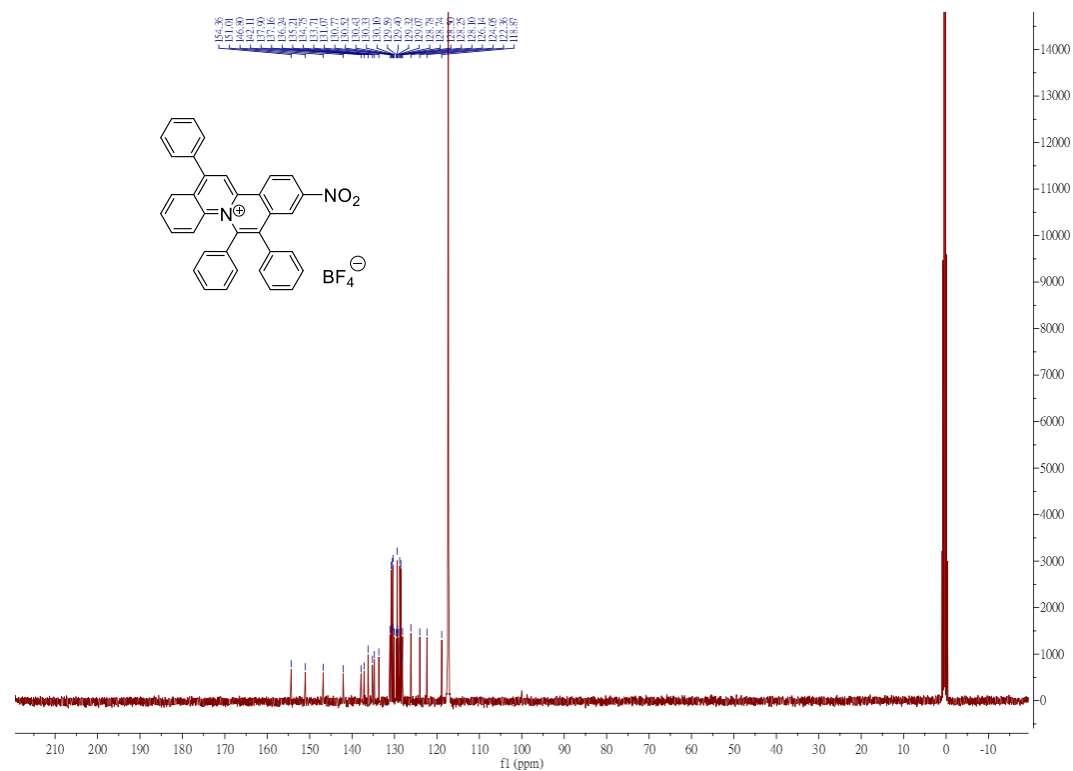

# <sup>1</sup>H NMR 11

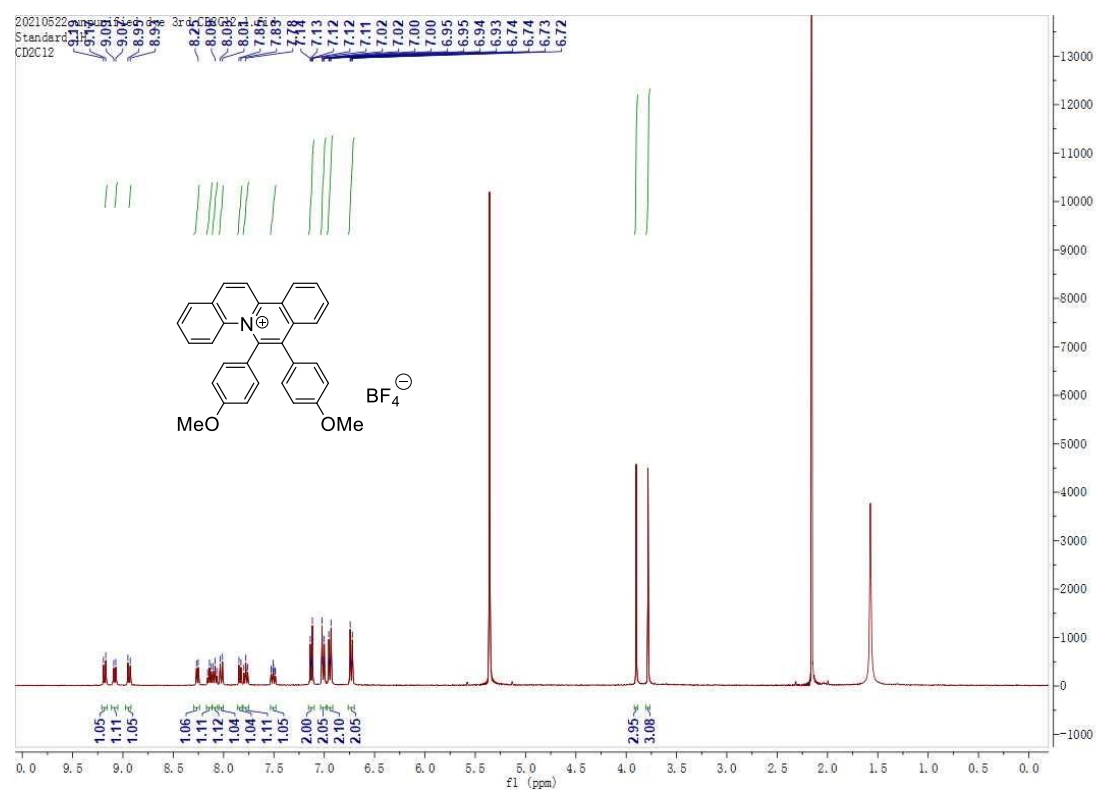

# <sup>13</sup>C NMR

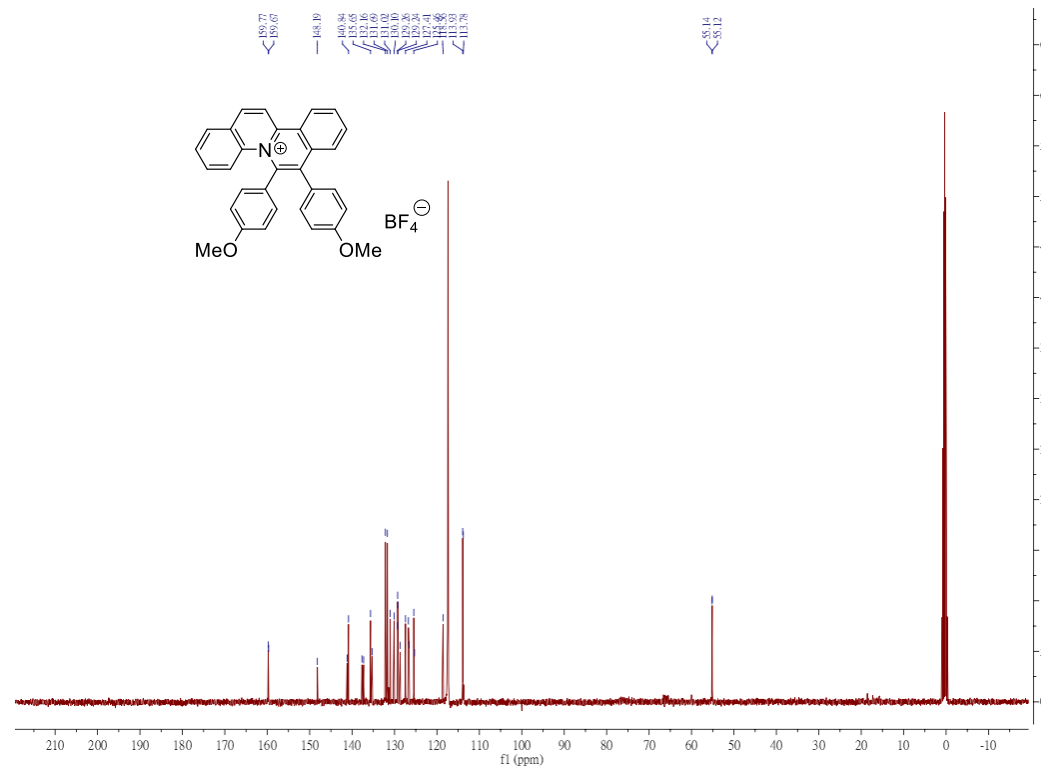

# <sup>1</sup>H NMR 1m

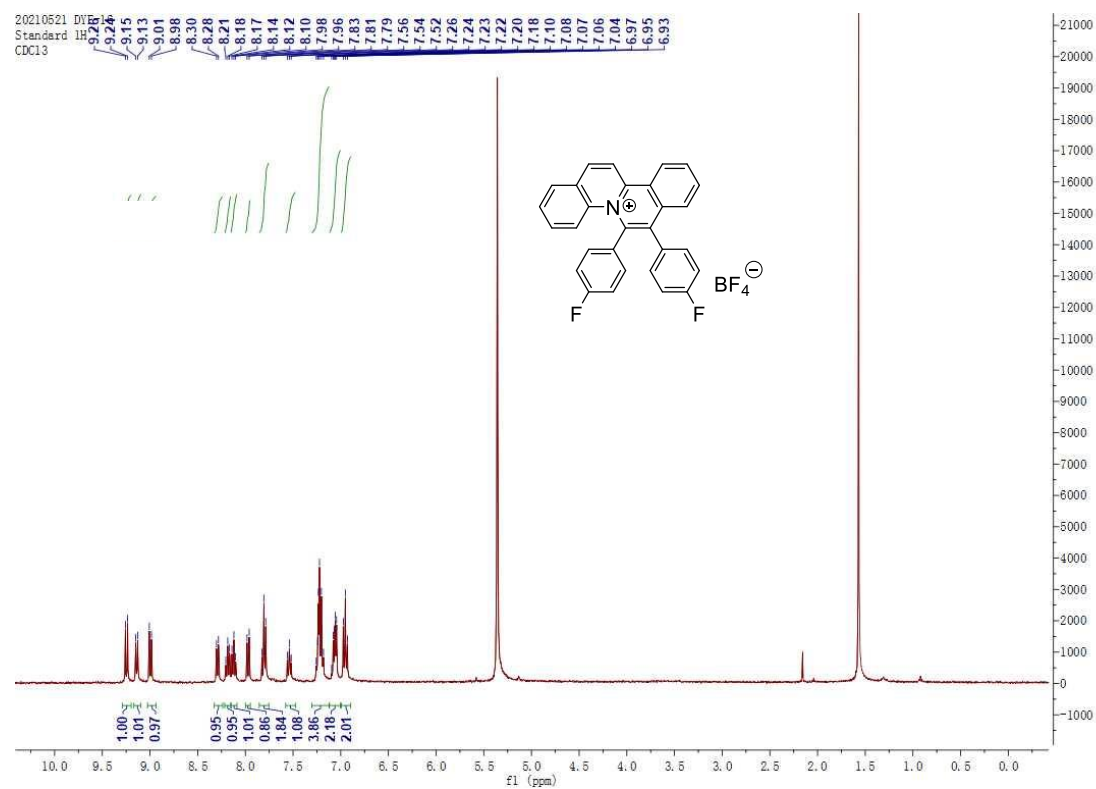

# <sup>13</sup>C NMR

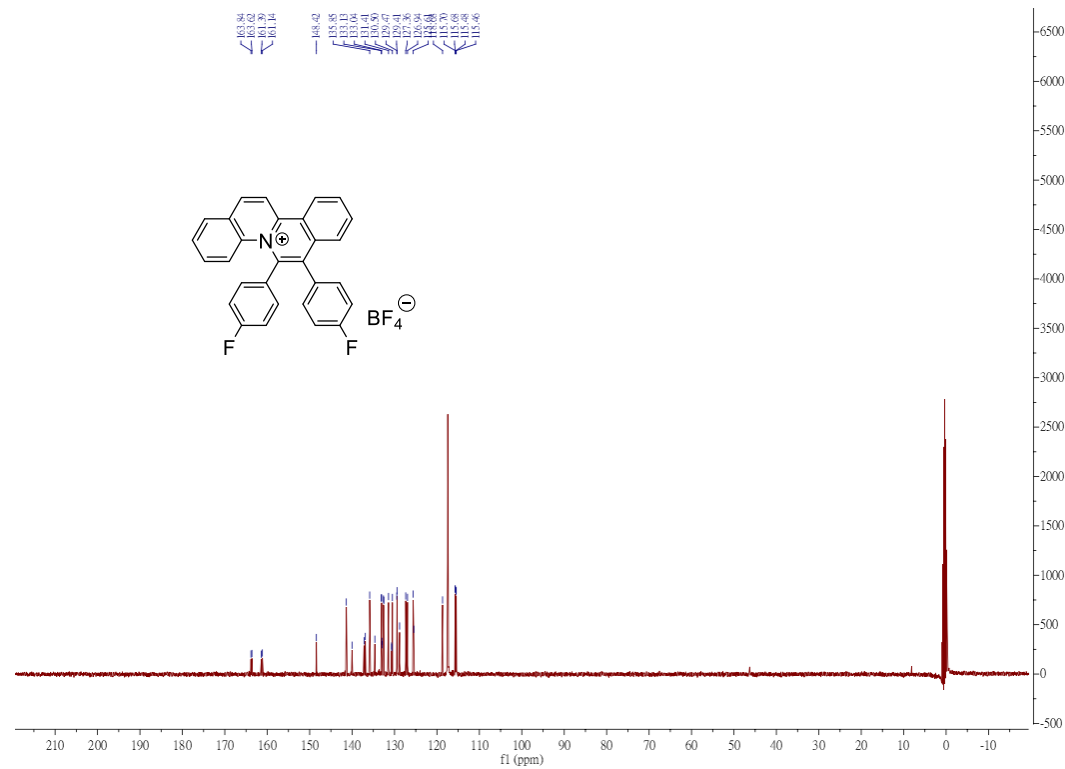

# $^{19}\text{F}$ NMR

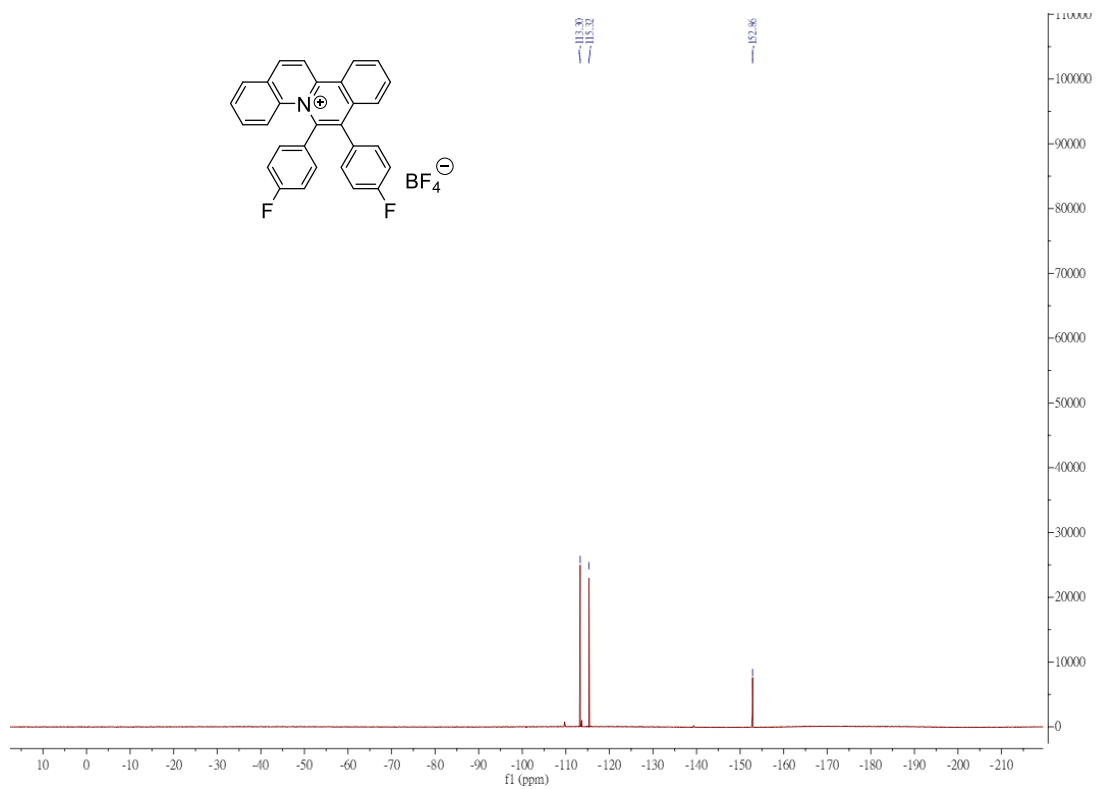

# <sup>1</sup>H NMR 1n

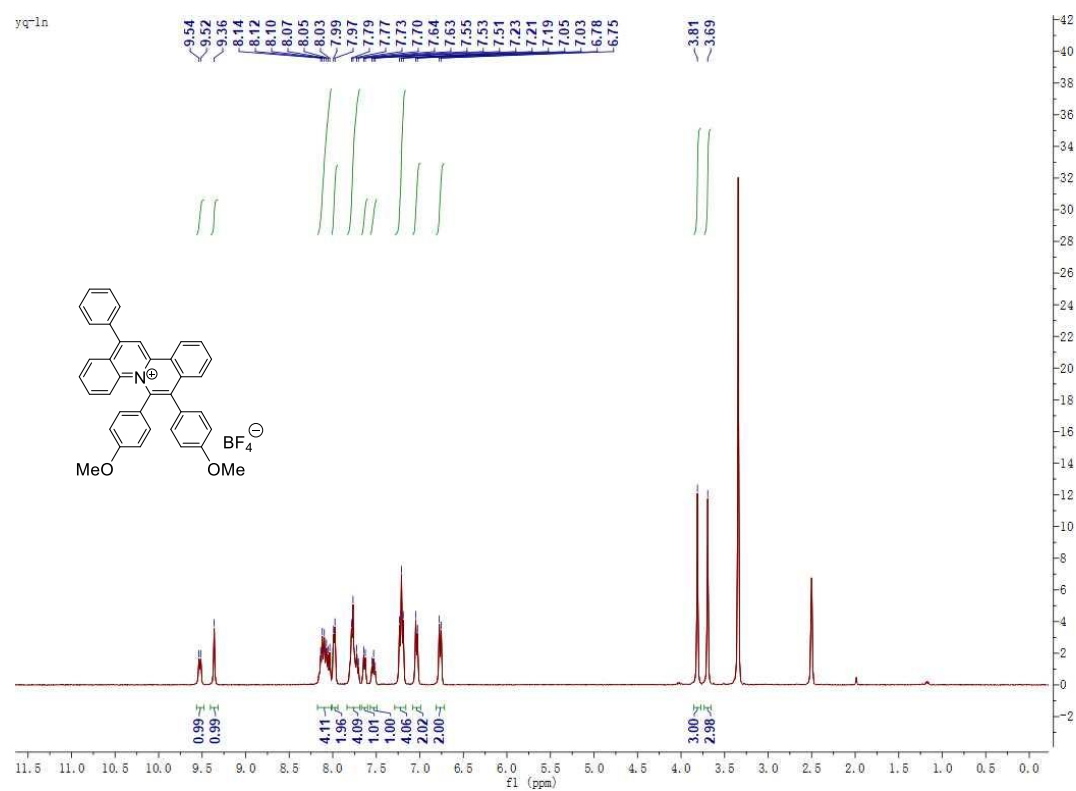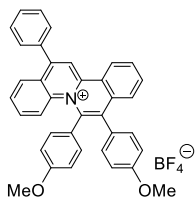

# <sup>13</sup>C NMR

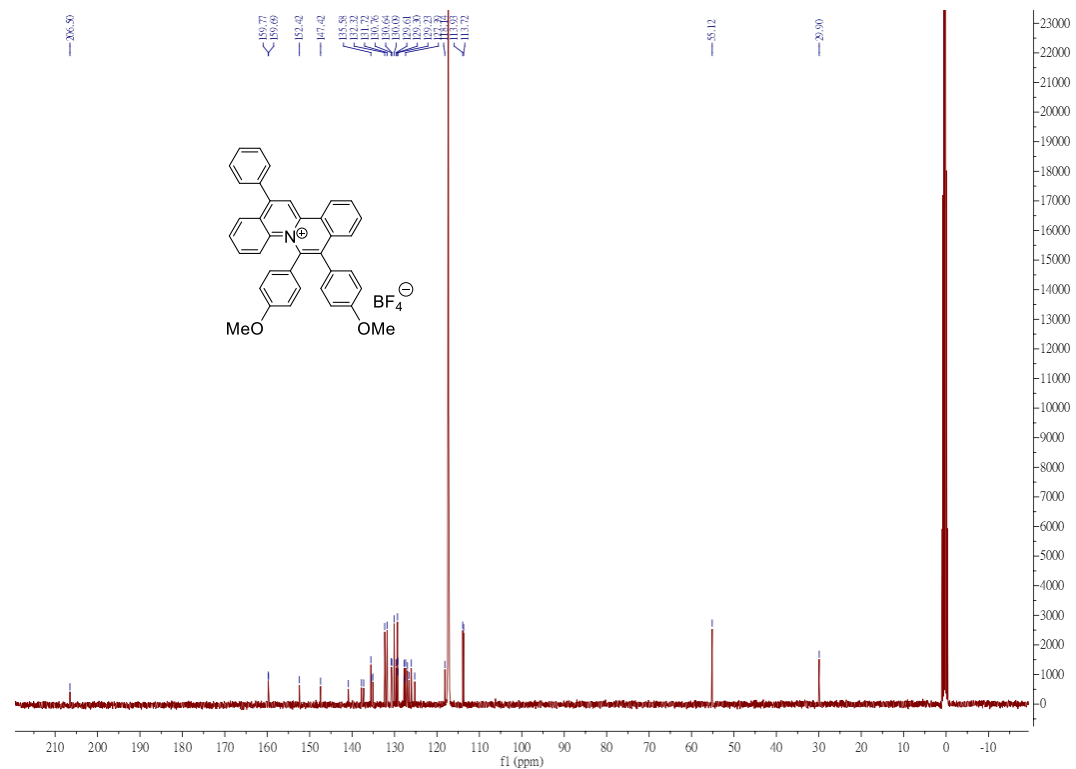

# <sup>1</sup>H NMR 1o

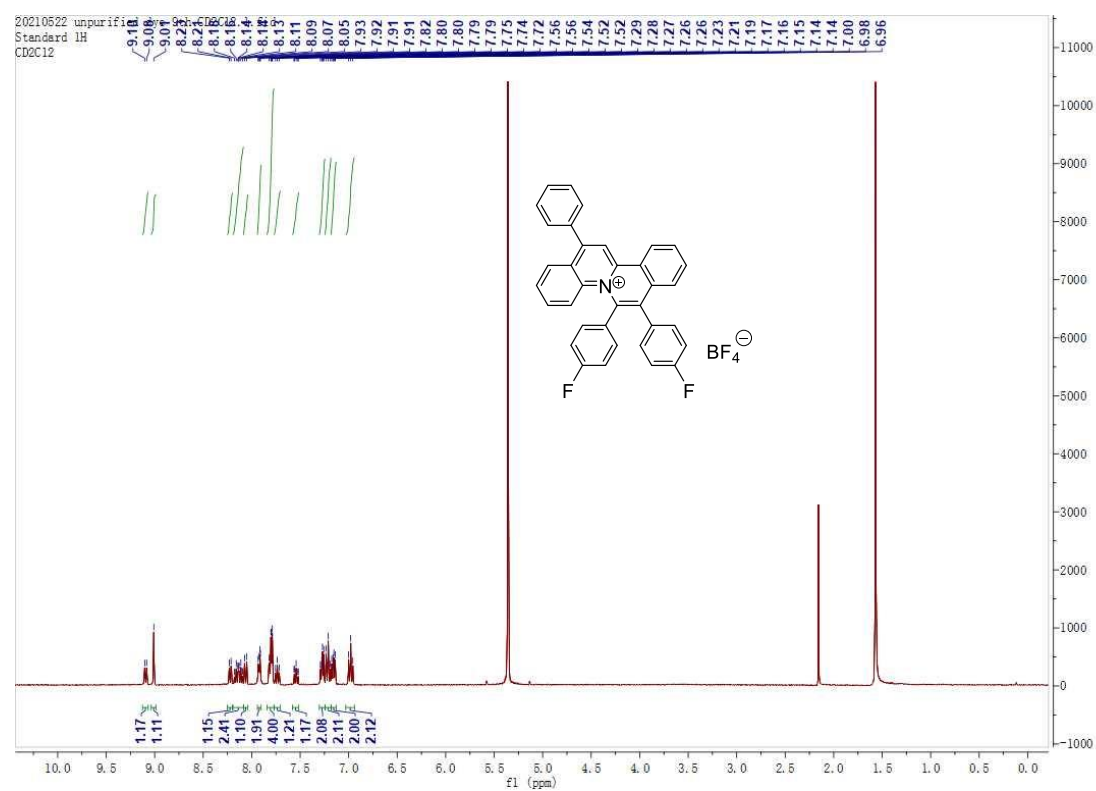

# <sup>13</sup>C NMR

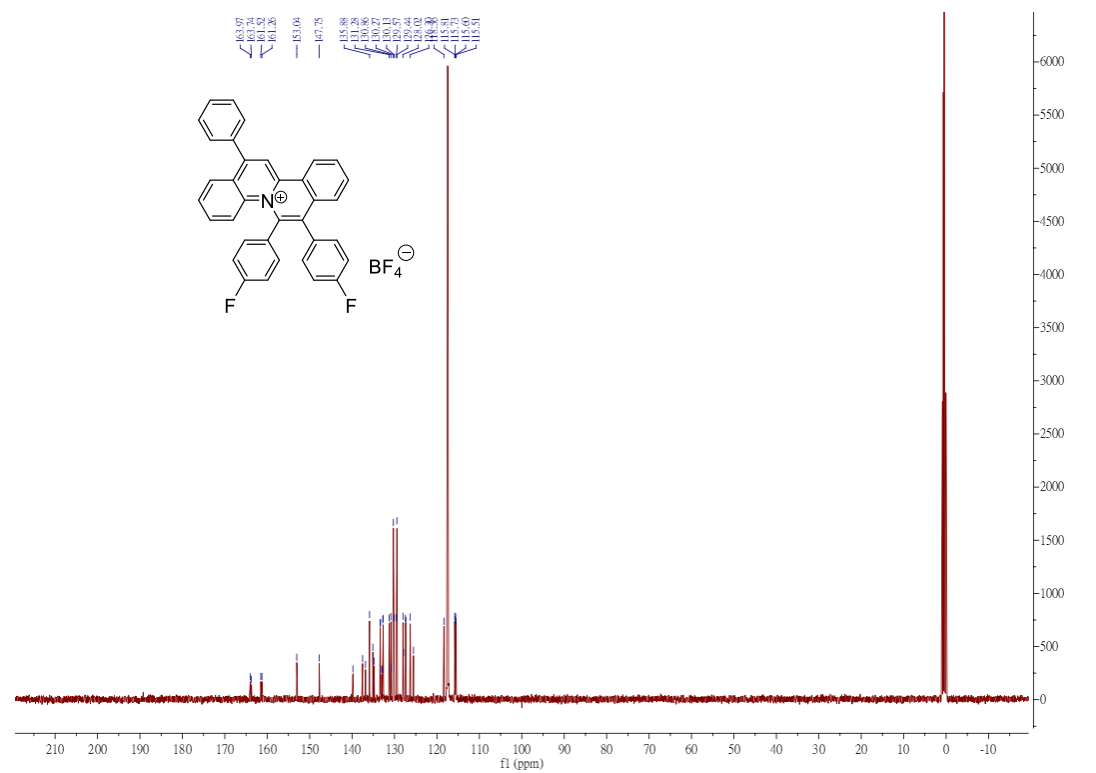

# <sup>19</sup>F NMR

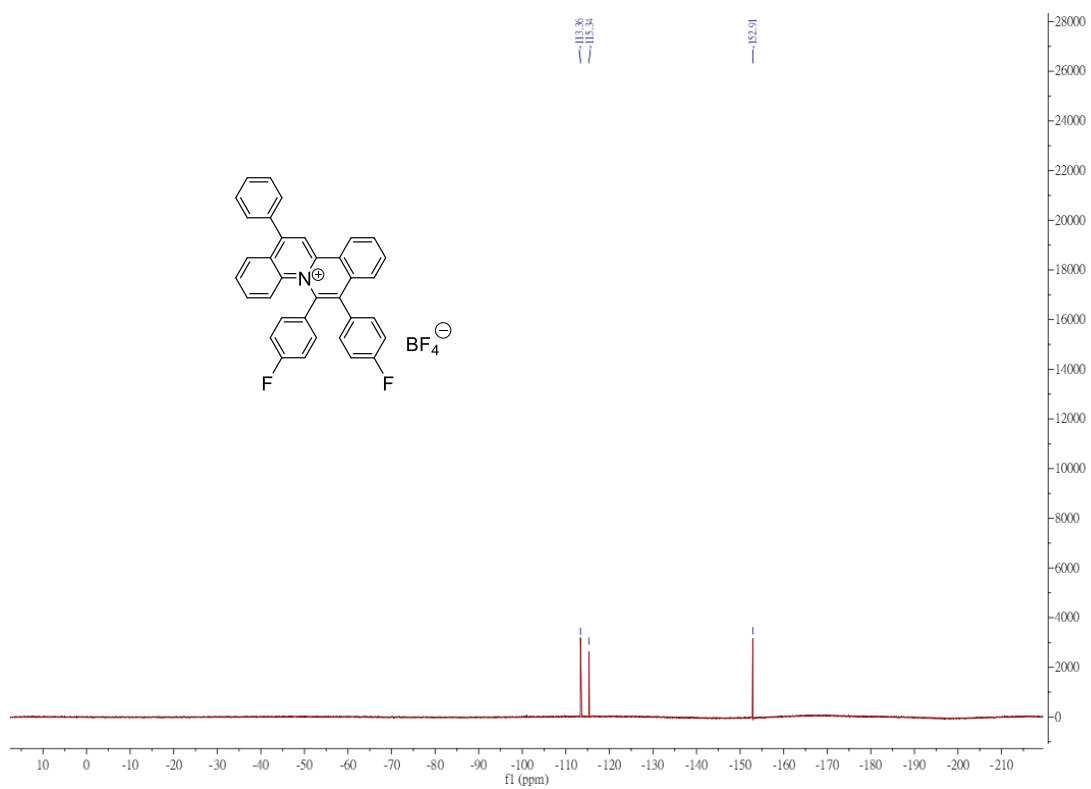

# <sup>1</sup>H NMR 1p

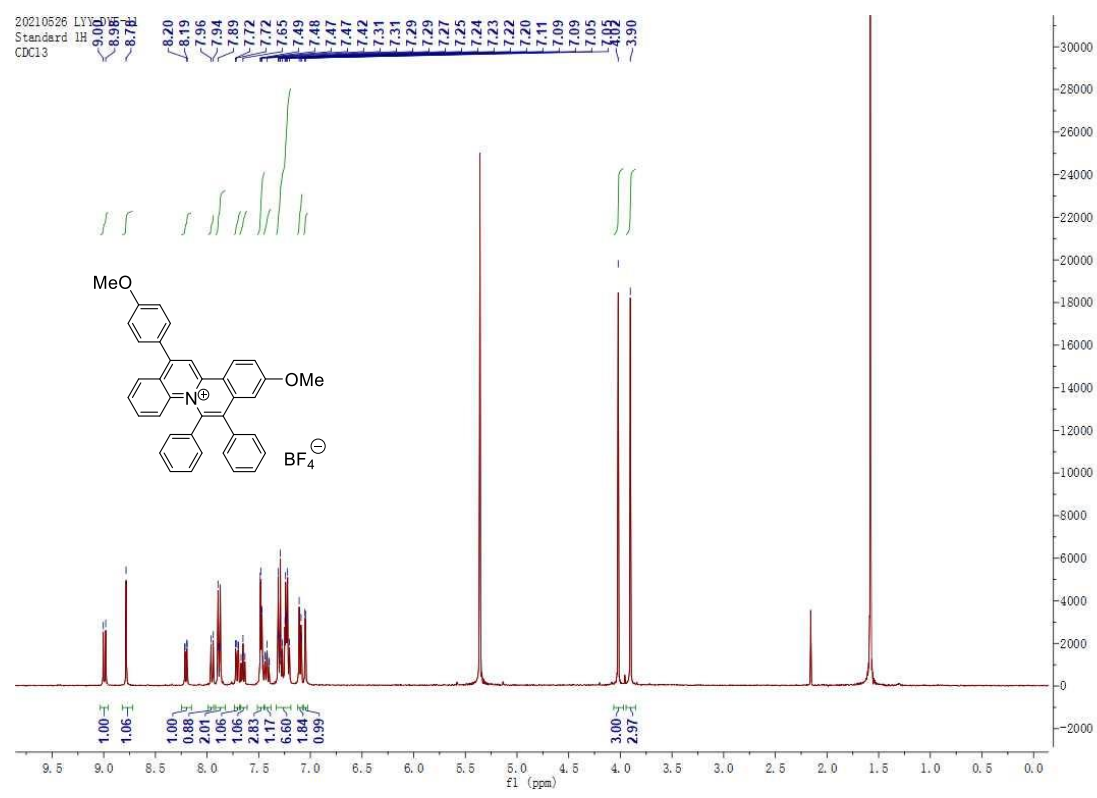

# <sup>13</sup>C NMR

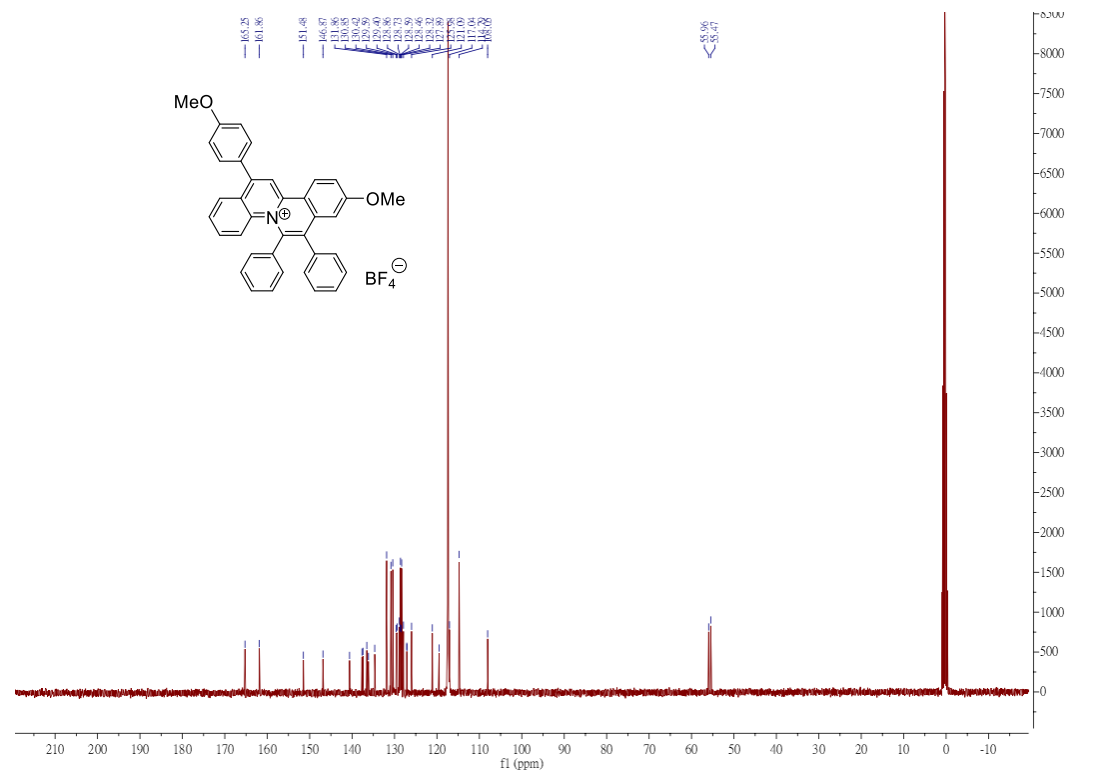



# <sup>1</sup>H NMR 1q

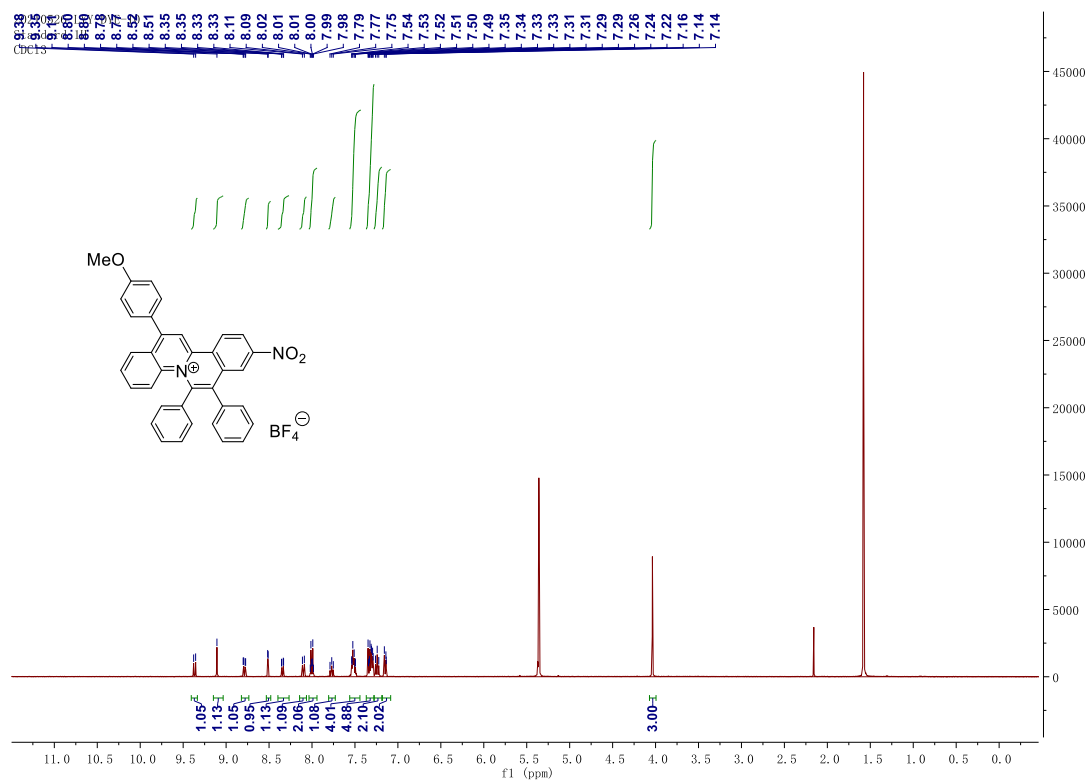

# <sup>13</sup>C NMR

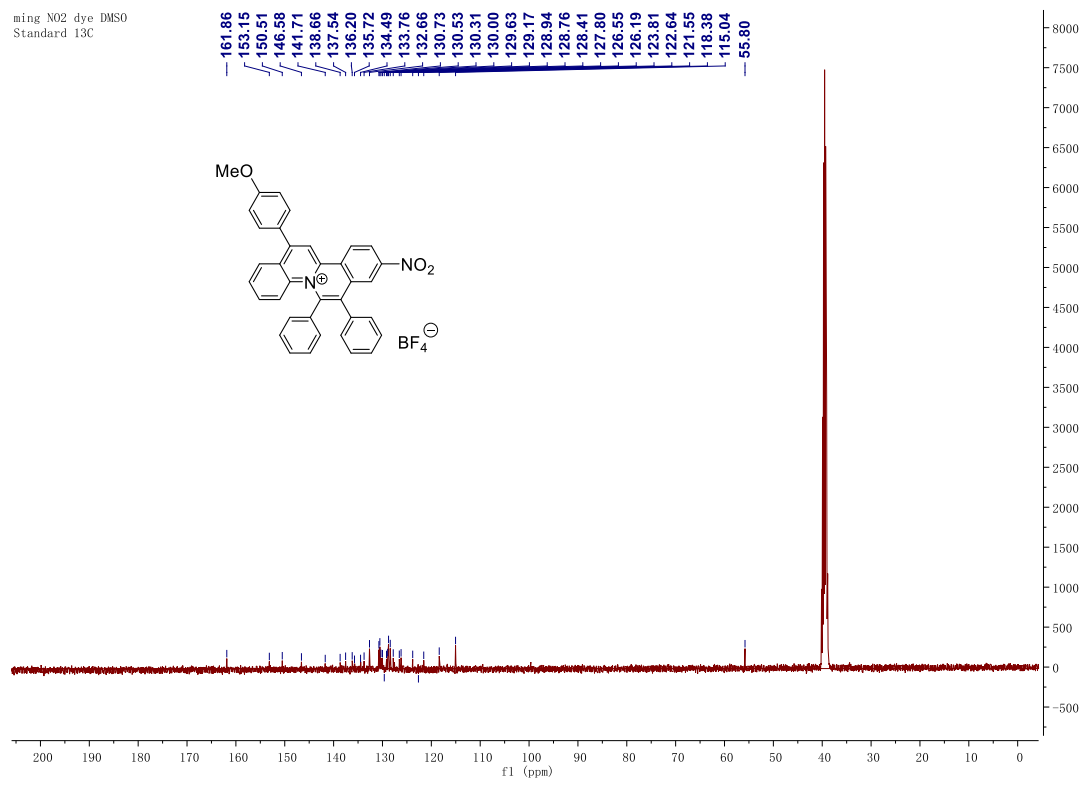

# <sup>1</sup>H NMR 1r

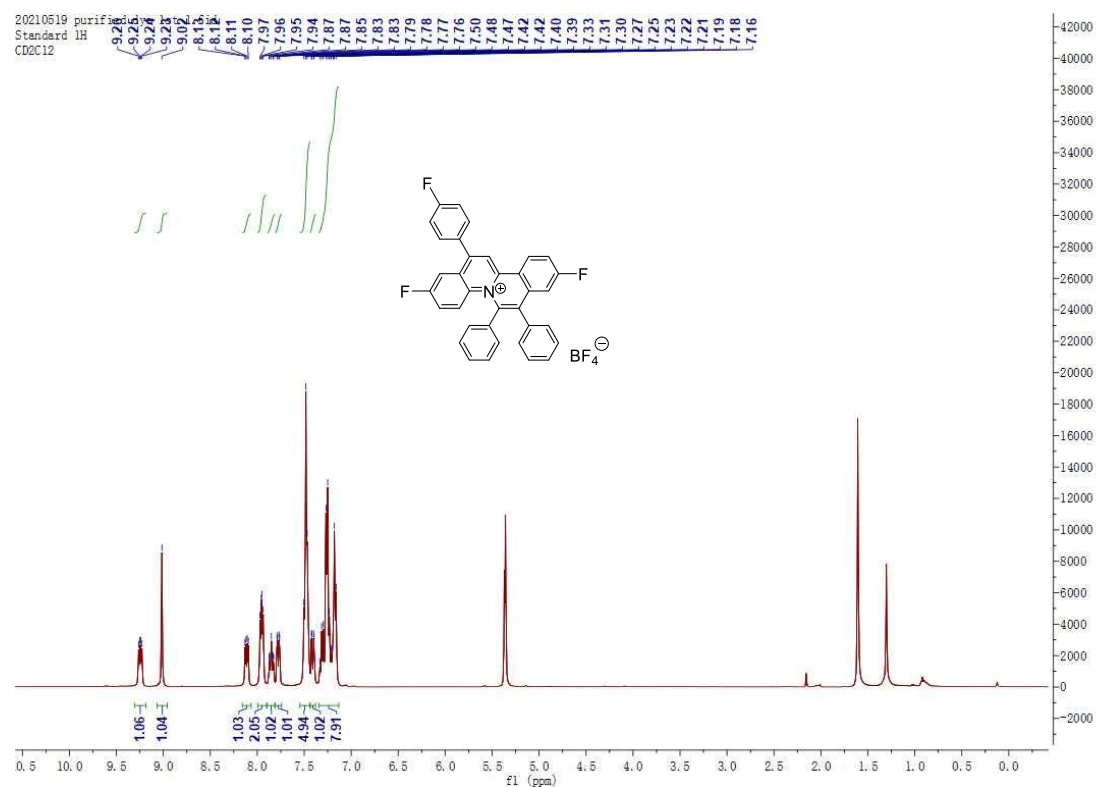

# <sup>13</sup>C NMR

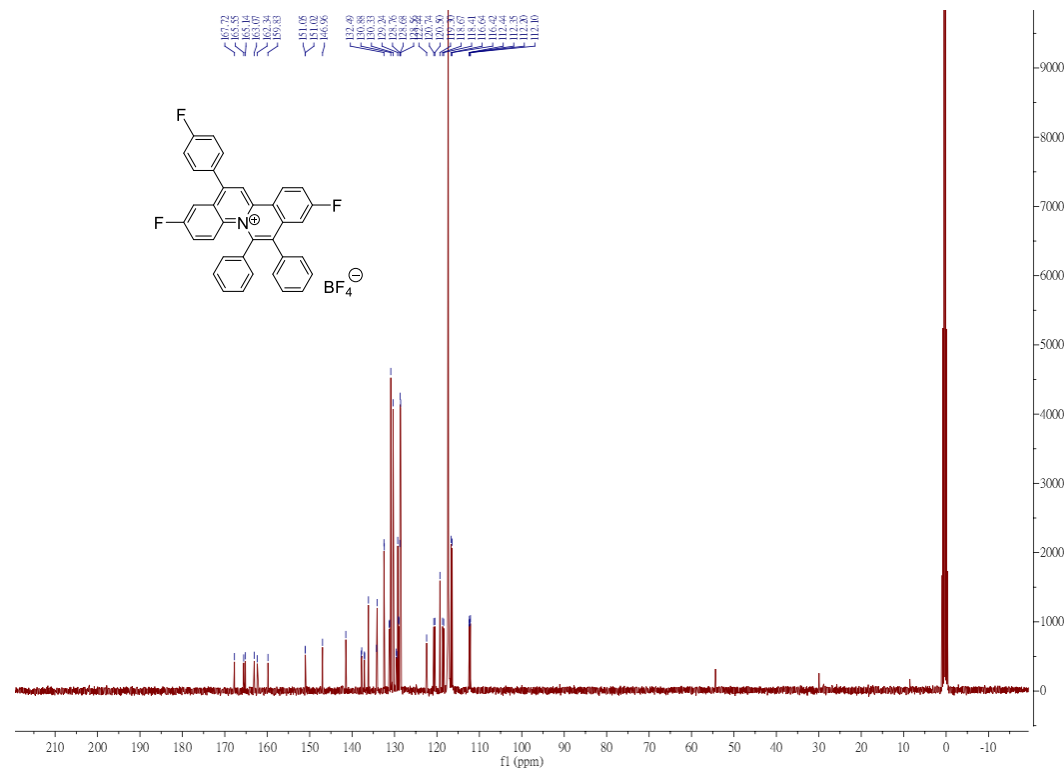

# <sup>19</sup>F NMR

Ming dye-YQ

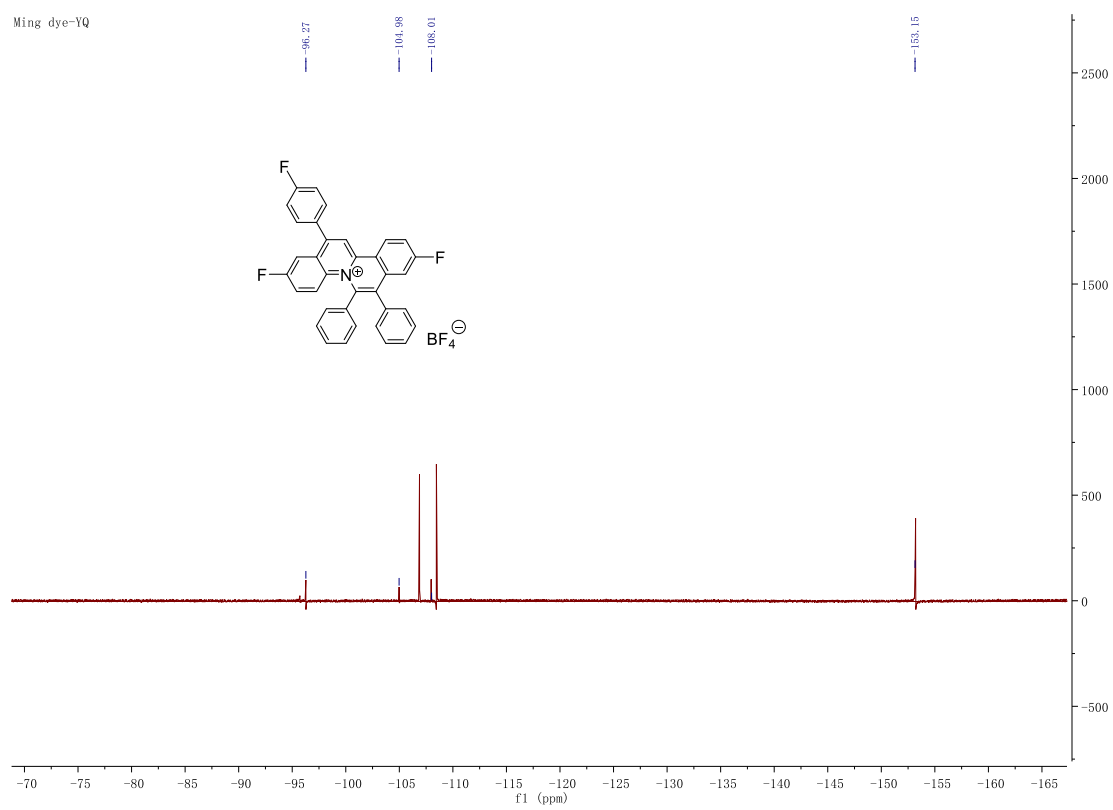

# <sup>1</sup>H NMR 1s

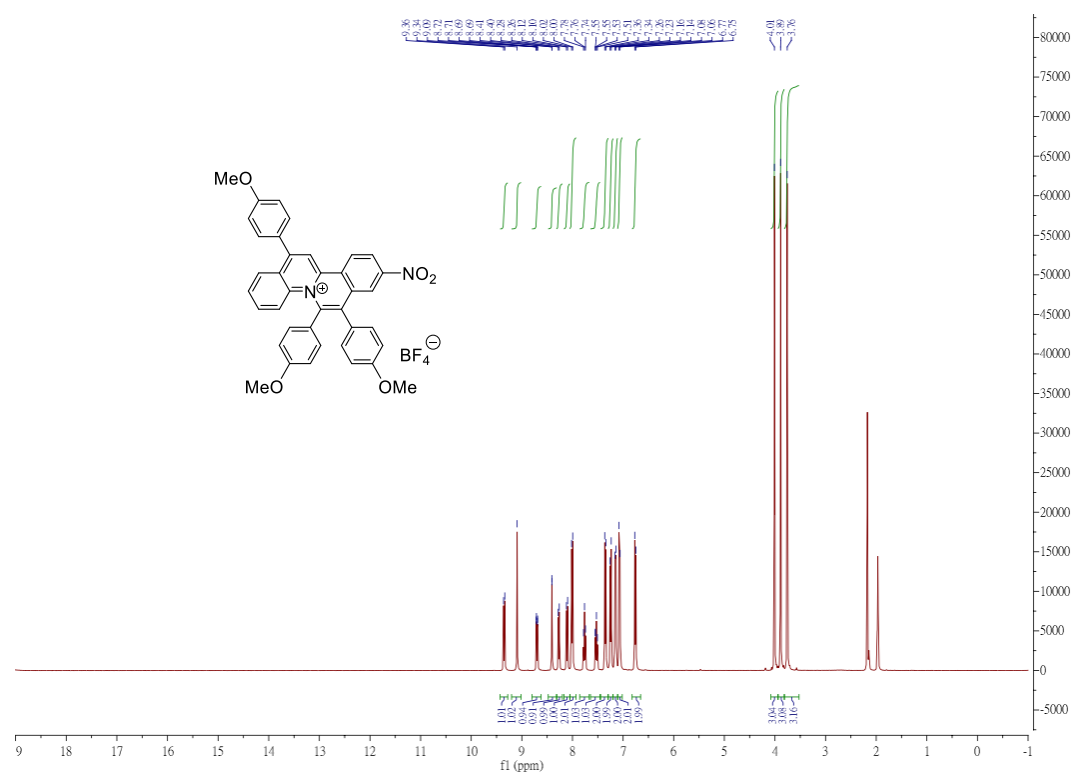

# <sup>13</sup>C NMR

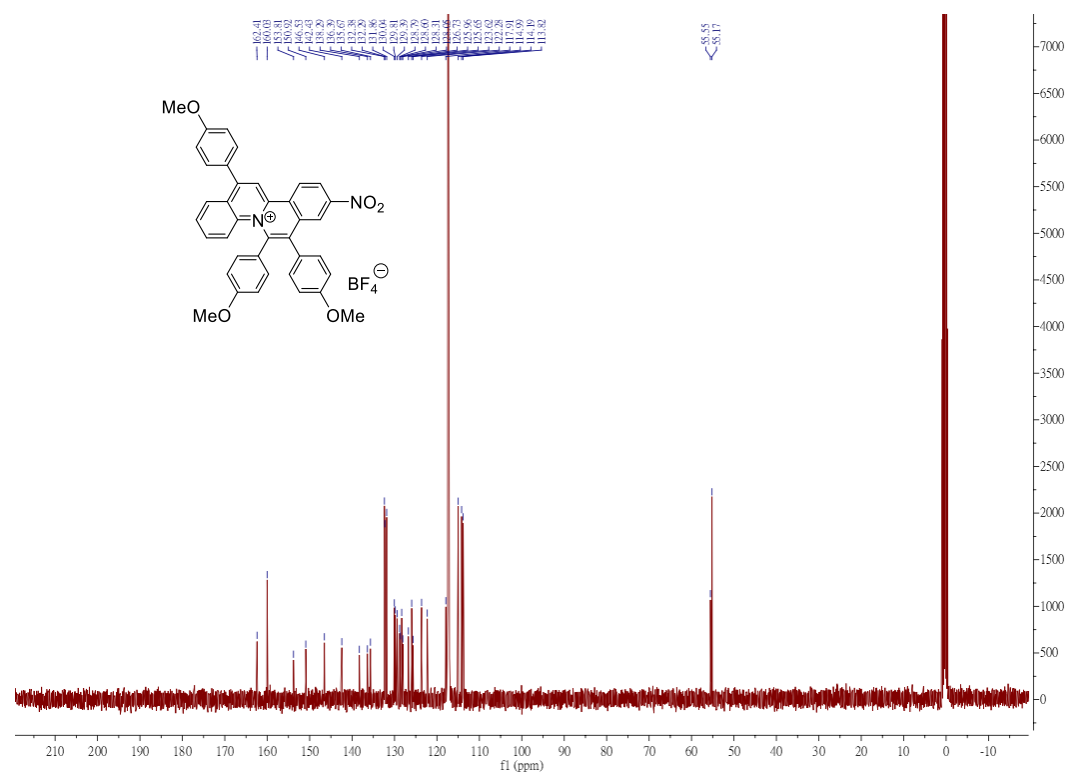

# <sup>1</sup>H NMR 1t

Bipure-2/1

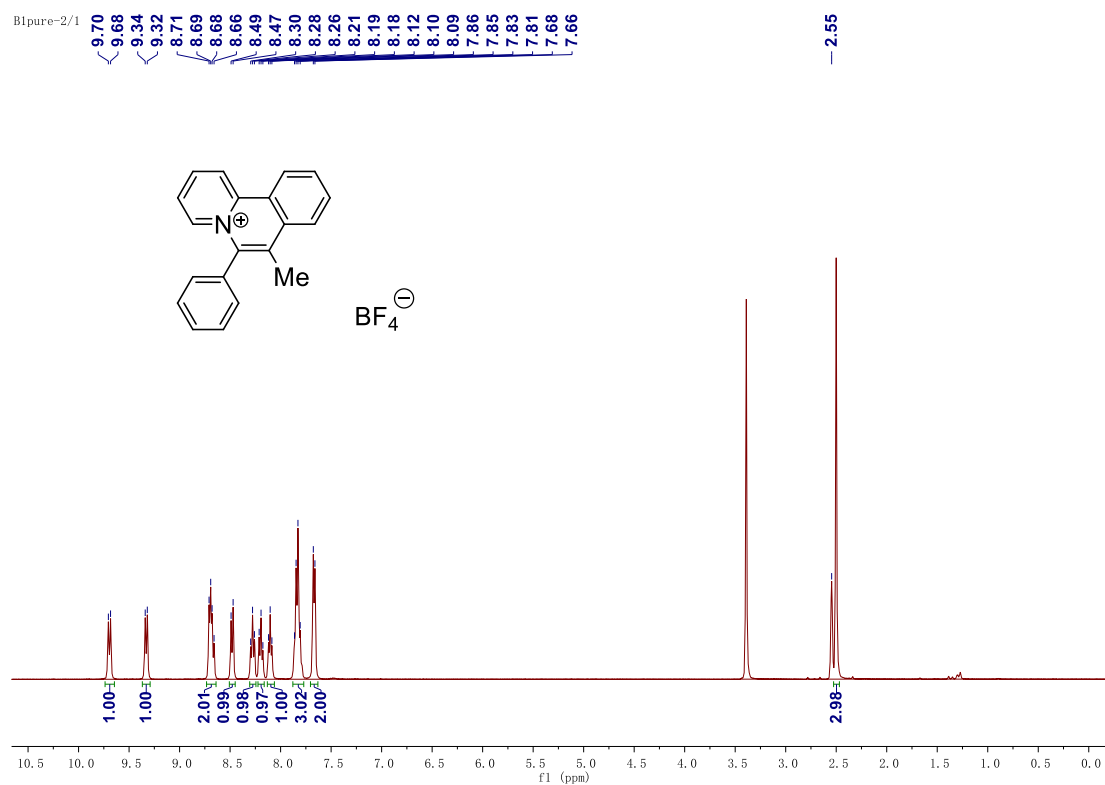

Supplement: d1ob00716e1.pdf [file d1ob00716e1.pdf]
